# Supplementary material for: Extant and extinct bilby genomes combined with Indigenous knowledge improve conservation of a unique Australian marsupial
Source: PubMed Central journal article supplement (PMC11239497; doi:10.1038/s41559-024-02436-2), 2024-07-01
Supplement: 41559_2024_2436_MOESM1_ESM.pdf [file 41559_2024_2436_MOESM1_ESM.pdf]

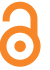

---

# **Extant and extinct bilby genomes combined with Indigenous knowledge improve conservation of a unique Australian marsupial**

---

In the format provided by the authors and unedited

---

## **Extant and extinct bilby genomes combined with Indigenous knowledge improve conservation of a unique Australian marsupial**

Carolyn J. Hogg<sup>1,2\*#</sup>, Richard J. Edwards<sup>3,4\*</sup>, Katherine A. Farquharson<sup>1,2\*</sup>, Luke W. Silver<sup>1</sup>, Parice Brandies<sup>1</sup>, Emma Peel<sup>1,2</sup>, Merly Escalona<sup>5</sup>, Frederick R. Jaya<sup>1</sup>, Rujiporn Thavornkanlapachai<sup>6</sup>, Kimberley Batley<sup>1</sup>, Tessa M. Bradford<sup>7,8</sup>, J King Chang<sup>4</sup>, Zhiliang Chen<sup>9</sup>, Nandan Deshpande<sup>4,10</sup>, Martin Dziminski<sup>6</sup>, Kyle M. Ewart<sup>1</sup>, Oliver W. Griffith<sup>11</sup>, Laia Marin-Gual<sup>12,13</sup>, Katherine L. Moon<sup>5,14</sup>, Kenny J. Travouillon<sup>15</sup>, Paul Waters<sup>4</sup>, Camilla M. Whittington<sup>1</sup>, Marc R. Wilkins<sup>4,10</sup>, Kristofer M. Helgen<sup>16</sup>, Nathan Lo<sup>1</sup>, Simon Y. W. Ho<sup>1</sup>, Aurora Ruiz Herrera<sup>12,13</sup>, Rachel Paltridge<sup>17</sup>, Jennifer A. Marshall Graves<sup>18</sup>, Marilyn Renfree<sup>19</sup>, Beth Shapiro<sup>5,14</sup>, Kym Ottewell<sup>6</sup>, Kiwirrkurra Rangers<sup>20</sup>, Katherine Belov<sup>1,2</sup>

<sup>1</sup> School of Life and Environmental Sciences, The University of Sydney, NSW, Australia

<sup>2</sup> ARC Centre of Excellence for Innovations in Peptide and Protein Science, The University of Sydney, NSW, Australia

<sup>3</sup> Minderoo OceanOmics Centre at UWA Oceans Institute, The University of Western Australia, Perth, WA, Australia

<sup>4</sup> School of Biotechnology and Biomolecular Sciences, UNSW Sydney, Sydney, NSW, Australia

<sup>5</sup> Department of Ecology and Evolutionary Biology, University of California Santa Cruz, Santa Cruz, CA, USA

<sup>6</sup> Biodiversity and Conservation Science, Department of Biodiversity, Conservation and Attractions, Kensington, WA 6151, Australia

<sup>7</sup> Evolutionary Biology Unit, South Australian Museum, Adelaide, SA, Australia

<sup>8</sup> School of Biological Sciences, The University of Adelaide, Adelaide, SA, Australia

<sup>9</sup> Illumina, Melbourne, VIC, Australia

<sup>10</sup> Ramaciotti Centre for Genomics and School of Biotechnology and Biomolecular Science, UNSW Sydney

<sup>11</sup> School of Natural Sciences, Macquarie University, Sydney, NSW, Australia

<sup>12</sup> Departament de Biologia Cel·lular, Fisiologia i Immunologia, Universitat Autònoma de Barcelona, Cerdanyola del Vallès, Spain.

<sup>13</sup> Genome Integrity and Instability Group, Institut de Biotecnologia i Biomedicina, Universitat Autònoma de Barcelona, Cerdanyola del Vallès, Spain.

<sup>14</sup> Howard Hughes Medical Institute, University of California Santa Cruz, Santa Cruz, CA, USA

<sup>15</sup> Collections and Research, Western Australian Museum, Welshpool, WA, Australia

<sup>16</sup> Australian Museum Research Institute, Australian Museum, Sydney, NSW, Australia

<sup>17</sup> Indigenous Desert Alliance, Alice Springs, NT, Australia

<sup>18</sup> Department of Environment and Genetics, La Trobe University, Melbourne, Victoria, Australia

<sup>19</sup> School of BioSciences, University of Melbourne, Melbourne, Victoria, Australia

<sup>20</sup> Kiwirrkurra Community, Gibson Desert, WA, Australia

\* contributed equally; # corresponding author

Corresponding author: Carolyn Hogg ([carolyn.hogg@sydney.edu.au](mailto:carolyn.hogg@sydney.edu.au))

## Table of Contents

|                                                                 |    |
|-----------------------------------------------------------------|----|
| Supplementary Tables.....                                       | 4  |
| Supplementary Figures .....                                     | 24 |
| Supplementary Notes .....                                       | 28 |
| 1 Ninu Genome Sequencing, Assembly and Analysis .....           | 28 |
| 1.1 Sample Collection and DNA extraction .....                  | 28 |
| 1.2 Genome library preparation and sequencing .....             | 28 |
| 1.3 Genome assembly .....                                       | 28 |
| 1.4 Mitochondrial genome assembly .....                         | 30 |
| 1.5 Manual curation of nuclear genome assembly.....             | 30 |
| 1.6 Assembly quality assessment.....                            | 30 |
| 1.7 Resequenced genomes .....                                   | 31 |
| 1.8 Genome-wide association study .....                         | 34 |
| 2 Bilby population genomics .....                               | 35 |
| 2.1 Historical population size .....                            | 35 |
| 2.2 Runs of Homozygosity (ROH) analysis .....                   | 37 |
| 2.3 Managed Metapopulation History and Study Sites .....        | 40 |
| 2.4 Metapopulation Sample Collection and Analyses .....         | 42 |
| 2.5 MassARRAY SNP Panel Design.....                             | 46 |
| 2.6 Management Recommendations .....                            | 52 |
| 3 Ninu Genome Annotation and Gene Family Investigation.....     | 53 |
| 3.1 RNA extractions and transcriptome sequencing .....          | 53 |
| 3.2 Transcriptome assembly .....                                | 53 |
| 3.3 Genome annotation .....                                     | 54 |
| 3.4 Chromosome synteny plots.....                               | 56 |
| 3.5 X-chromosome read depth and meiotic immunofluorescence..... | 56 |
| 3.6 Gene family investigation .....                             | 56 |
| 3.7 Olfactory receptor genes .....                              | 59 |
| 3.8 Characterisation of Ninu immune genes.....                  | 60 |
| 4 Supplementary References.....                                 | 62 |

## Supplementary Tables

**Table S1:** Individuals used for the Ninu and Yallara resequenced genomes including Sample ID, sex, collection location and date, sample type, tissue preservation and subspecies. Coverage in brackets is the coverage per sample when combined with the Yallara data for the Yallara phylogenetic analyses.

| Species                           | Location sampled                            | Sample ID                           | Sex | Tissue Type         | Collection Year | Coverage                                                 | No. Variants |
|-----------------------------------|---------------------------------------------|-------------------------------------|-----|---------------------|-----------------|----------------------------------------------------------|--------------|
| <i>Macrotis lagotis</i>           | Temperate                                   | 956000004913012                     | F   | ear biopsy          | 1/10/2019       | 23.7                                                     | 16313234     |
| <i>Macrotis lagotis</i>           | Temperate                                   | 0007C7B153                          | F   | ear biopsy          | 1/10/2019       | 21.4                                                     | 15751276     |
| <i>Macrotis lagotis</i>           | Temperate                                   | 0007C7B720                          | F   | ear biopsy          | 1/10/2019       | 22.9                                                     | 16648688     |
| <i>Macrotis lagotis</i> *         | Temperate                                   | 0007C7C1A6                          | M   | ear biopsy          | 30/09/2019      | 13.8 (10.39)                                             | 16156427     |
| <i>Macrotis lagotis</i> *         | Temperate                                   | 0007C7AFE8                          | M   | ear biopsy          | 1/10/2019       | 26.4 (20.99)                                             | 15989712     |
| <i>Macrotis lagotis</i> *         | Temperate                                   | 7C7B6DB                             | M   | ear biopsy          | 30/09/2019      | 28 (22.25)                                               | 16251843     |
| <i>Macrotis lagotis</i>           | Semi-arid                                   | 000786C0A7                          | F   | ear biopsy          | 11/10/2019      | 22.6                                                     | 17815109     |
| <i>Macrotis lagotis</i>           | Semi-arid                                   | 0007DE091B                          | F   | ear biopsy          | 9/12/2019       | 22.8                                                     | 17719028     |
| <i>Macrotis lagotis</i>           | Semi-arid                                   | 2530351                             | F   | ear biopsy          | 15/01/2020      | 24                                                       | 17449262     |
| <i>Macrotis lagotis</i> *         | Semi-arid                                   | 10002530249                         | M   | ear biopsy          | 15/01/2020      | 26.2 (19.88)                                             | 17554347     |
| <i>Macrotis lagotis</i> *         | Semi-arid                                   | 0007B116F9                          | M   | ear biopsy          | 10/10/2019      | 29.6 (23.20)                                             | 17525424     |
| <i>Macrotis lagotis</i> *         | Semi-arid                                   | 0007B11508                          | M   | ear biopsy          | 2019            | 25.4 (19.18)                                             | 17405821     |
| <i>Macrotis leucura</i> *         | Unknown (British Museum of Natural History) | NHMU1883.10.19.17 (Sequence ID: A1) | M   | skin                | Unknown         | 2.2 (1 <sup>st</sup> run)<br>9.28 (2 <sup>nd</sup> run)  |              |
| <i>Macrotis leucura minor</i> *,# | Northern Territory (Museums Victoria)       | NMVC7087 (Sequence ID: A2)          | M   | skull scraping bone | 1898            | 7.9 (1 <sup>st</sup> run)<br>12.82 (2 <sup>nd</sup> run) |              |
| <i>Macrotis leucura minor</i>     | Northern Territory (Museums Victoria)       | NMVC7091 (Sequence ID: A3)          | M   | preserved in spirit | 1895            | Failed QC                                                |              |

| Species                          | Location sampled                          | Sample ID                   | Sex | Tissue Type            | Collection Year | Coverage | No. Variants |
|----------------------------------|-------------------------------------------|-----------------------------|-----|------------------------|-----------------|----------|--------------|
| <i>Macrotis leucura</i>          | Northern Territory (Museums Victoria)     | NMVC7295 (Sequence ID: A7)  | F   | liver sample in spirit | 1895            | 0.73     |              |
| <i>Macrotis leucura miselius</i> | South Australia (South Australian Museum) | SAMAM3465 (Sequence ID: A9) | U   | skin sample            | 1931            | 0.99     |              |

\* Ninu and Yallara used in Yallara phylogenetic analyses

# Individual used to generate the Yallara reference genome

**Table S2:** Runs of homozygosity (ROH) statistics for the 12 re-sequenced Ninu, based on 29,266,950 SNPs (all missing data were removed).  $F_{ROH}$  WGS was based on the total ROH length divided by the total possible length of ROH (i.e. >98% of the genome length). Observed heterozygosity ( $H_o$ ) and inbreeding coefficients were colour-coded from most diverse (blue) to least diverse (red).

| Animal ID       | Source pop | $H_o$  | # of ROH | Total length of ROHs (kb) | Average ROH length (kb) | Length class (in Mb) |         |         |         |      | $F_{ROH}$ for ROHs >100 kb | $F_{ROH}$ for ROHs >500 kb | $F_{ROH}$ for ROHs >1 Mb |
|-----------------|------------|--------|----------|---------------------------|-------------------------|----------------------|---------|---------|---------|------|----------------------------|----------------------------|--------------------------|
|                 |            |        |          |                           |                         | 0-0.2                | 0.2-0.4 | 0.4-0.8 | 0.8-1.6 | >1.6 |                            |                            |                          |
| 000786C0A7      | Semi-arid  | 0.3095 | 45       | 5897.07                   | 131.046                 | 43                   | 2       | 0       | 0       | 0    | 0.0017                     | 0                          | 0                        |
| 0007B11508      | Semi-arid  | 0.2646 | 1806     | 381389                    | 211.179                 | 1110                 | 547     | 140     | 9       | 0    | 0.1072                     | 0.0113                     | 0.0007                   |
| 0007B116F9      | Semi-arid  | 0.2673 | 1708     | 389476                    | 228.03                  | 996                  | 534     | 157     | 20      | 1    | 0.1095                     | 0.0184                     | 0.0027                   |
| 0007DE091B      | Semi-arid  | 0.3084 | 52       | 6619.33                   | 127.295                 | 50                   | 2       | 0       | 0       | 0    | 0.0019                     | 0                          | 0                        |
| 10002530249     | Semi-arid  | 0.3016 | 329      | 54829                     | 166.653                 | 251                  | 72      | 6       | 0       | 0    | 0.0154                     | 0.0005                     | 0                        |
| 2530351         | Semi-arid  | 0.2704 | 1567     | 331214                    | 211.368                 | 974                  | 459     | 131     | 3       | 0    | 0.0931                     | 0.0114                     | 0                        |
| 0007C7AFE8      | Temperate  | 0.2306 | 2858     | 650189                    | 227.498                 | 1643                 | 933     | 253     | 29      | 0    | 0.1828                     | 0.0296                     | 0.0020                   |
| 0007C7B153      | Temperate  | 0.2305 | 3358     | 756725                    | 225.35                  | 1853                 | 1179    | 320     | 6       | 0    | 0.2128                     | 0.0249                     | 0                        |
| 0007C7B720      | Temperate  | 0.2658 | 1506     | 332785                    | 220.972                 | 905                  | 459     | 132     | 10      | 0    | 0.0936                     | 0.0137                     | 0                        |
| 0007C7C1A6      | Temperate  | 0.2475 | 2381     | 533696                    | 224.148                 | 1333                 | 820     | 223     | 5       | 0    | 0.1501                     | 0.0188                     | 0                        |
| 7C7B6DB         | Temperate  | 0.2442 | 2329     | 532387                    | 228.59                  | 1327                 | 753     | 231     | 18      | 0    | 0.1497                     | 0.0240                     | 0.0014                   |
| 956000004913012 | Temperate  | 0.2449 | 2740     | 605724                    | 221.067                 | 1529                 | 968     | 238     | 5       | 0    | 0.1703                     | 0.0172                     | 0                        |

**Table S3:** Ninu individuals identified by faecal DNA analysis in 2021 and 2022 and the numbers of scats successfully genotyped for each individual in each year. Feral cat management is implemented in areas south of the Kiwirrkurra community but not in the north-eastern Ninu colonies. \* indicates Ninu that were identified in both 2021 and 2022 (i.e. ‘recaptures’).

| Animal ID              | Sex          | # scats 2021 | # scats 2022 | Sub-population ID |
|------------------------|--------------|--------------|--------------|-------------------|
| Southern colonies      |              |              |              |                   |
| Ninu1                  | Male         | 3            |              | NAM               |
| Ninu2 *                | Female       | 2            | 2            | NAM               |
| Ninu5                  | Female       | 13           |              | NAM               |
| Ninu11                 | Male         | 4            |              | NAM               |
| Ninu12                 | Undetermined | 1            |              | NAM               |
| Ninu18                 | Undetermined |              | 1            | NAM               |
| Ninu19                 | Female       |              | 1            | NAM               |
| Ninu20                 | Female       |              | 1            | NAM               |
| Ninu21                 | Female       |              | 3            | NAM/NG            |
| Ninu3                  | Male         | 5            |              | NG                |
| Ninu4 *                | Male         | 4            | 8            | NG                |
| Ninu6 *                | Female       | 12           | 2            | NG                |
| Ninu22                 | Male         |              | 2            | NG                |
| Ninu23                 | Female       |              | 2            | WR                |
| Ninu24                 | Female       |              | 1            | WW                |
| Ninu25                 | Male         |              | 8            | WW                |
| North-eastern colonies |              |              |              |                   |
| Ninu7                  | Female       | 20           |              | MU                |
| Ninu8                  | Male         | 3            |              | MU                |
| Ninu9                  | Male         | 9            |              | MU                |
| Ninu10 *               | Male         | 1            | 6            | MU                |
| Ninu13                 | Undetermined |              | 5            | MU                |
| Ninu14                 | Male         |              | 1            | MU                |
| Ninu15                 | Undetermined |              | 2            | MU                |
| Ninu16                 | Female       |              | 3            | MU                |
| Ninu17                 | Female       |              | 1            | MU                |



**Table S4:** GO terms and associated genes from association analysis of arid vs. temperate Ninu.

| GO term ID | GO term definition                           | No. of genes | Genes                                                                                                                                                                                                                                                                                                                                                                                                                                |
|------------|----------------------------------------------|--------------|--------------------------------------------------------------------------------------------------------------------------------------------------------------------------------------------------------------------------------------------------------------------------------------------------------------------------------------------------------------------------------------------------------------------------------------|
| GO:0048856 | anatomical structure development             | 71           | <i>ABLIM1 ACSBG1 ADGRL3 ARHGEF26 ARID1B ARNT2 ATP2C2 ATRNL1 BCHE BNIP3 BTRC CDH11 CHD2 CNTN5 COL11A1 CSMD3 DIXDC1 DYNC2H1 ECE1 EHD1 EHF EMX1 ETV1 EYS FARP1 FMR1 FRAS1 FZR1 GFRA1 GNAI3 GPRC5B HMGB1 IDE IDH2 INA IQCG KAZN KITLG LAMA3 LDB3 LPIN1 MAP2 MBNL3 MCTP2 MECOM MITF MYT1L NLGN1 NME8 NRAP OSTN PCSK5 PEAK1 PLD4 PRKN PRPS1 PTPN2 RBM20 RECK RXFP2 SLC1A2 ST8SIA2 SYNE1 SYNJ2 TCF7L2 TEX11 TIPARP TWF1 UTRN VAX2 ZMYM3</i> |
| GO:0006810 | transport                                    | 51           | <i>ABCG8 AGAP1 ARL14 ARMC8 ATP10B ATP2C2 ATP8A1 BNIP3 CACNA2D3 CDC42SE1 CP DENND2A DLG2 DYNC2H1 EHD1 ELMO1 ERC2 FMR1 FRAS1 GNAI3 GRID1 HMGB1 HTR3B IDE IPCEF1 KCNB1 KIF15 LDLRAD3 LRP1B NHLRC2 NLGN1 OSBPL10 PCSK5 PLD4 PLIN3 PPFIA2 PRKN RANBP1 RPH3AL RPSA SCIN SLC15A2 SLC1A2 SLC28A3 SLC9A9 SLCO3A1 SV2B TBC1D21 TMC5 TMEM266 ZDHHC14</i>                                                                                        |
| GO:0030154 | cell differentiation                         | 48           | <i>ADGRL3 ARHGEF26 ARID1B BCHE BNIP3 CDH11 CHD2 COL11A1 CSMD3 DIXDC1 DYNC2H1 EHD1 EHF EMX1 ETV1 FARP1 FMR1 FZR1 GFRA1 GPRC5B HMGB1 IDH2 INA IQCG KAZN KITLG LAMA3 LDB3 MAP2 MECOM MITF MYT1L NLGN1 NME8 NRAP OSTN PEAK1 PLD4 PRKN PTPN2 RXFP2 SPEF2 SYNE1 TBC1D21 TCF7L2 TIPARP TWF1 VAX2</i>                                                                                                                                        |
| GO:0007165 | signal transduction                          | 46           | <i>ADGRL3 ARHGEF26 ATRNL1 BNIP3 BTRC CDC42SE1 COPS8 CRHR2 DIXDC1 DLG2 ELMO1 FHIT FMR1 FZR1 GFRA1 GNAI4 GNAI3 GPRC5B GRID1 GRM7 HMGB1 HTR3B IDE INSYN1 KCNB1 KITLG LAMA3 LILRA2 LRRFIP2 MAML3 MCTP2 MITF MUC19 NLGN1 OR4C12 OSTN PRKAR1B PTPN2 RANBP1 RECK RXFP2 SORCS3 TCF7L2 TIAM2 TIPARP VAX2</i>                                                                                                                                  |
| GO:0034641 | cellular nitrogen compound metabolic process | 29           | <i>ACSBG1 AGPAT4 BBOX1 BTRC COPS8 DLG2 ECE1 EHF ETV1 FHIT FMR1 FZR1 GNAI3 HMGB1 IDE IDH2 MAML3 MBNL3 MITF NEU4 PCSK5 PRCC PRPS1 RBM20 RPSA ST8SIA2 TCF7L2 TERF2IP TEX11</i>                                                                                                                                                                                                                                                          |

| GO term ID | GO term definition                    | No. of genes | Genes                                                                                                                                                                       |
|------------|---------------------------------------|--------------|-----------------------------------------------------------------------------------------------------------------------------------------------------------------------------|
| GO:0022607 | cellular component assembly           | 27           | <i>ABLIM1/ADGRL3/ARHGEF26/ARID1B/CDH11/CNTN5/COPS8/DYNC2H1/EHD1/ERC2/FARP1/IDE/IQCG/KCNB1/LAMA3/LDB3/MITF/NLGN1/NME8/NRAP/PEAK1/PRKN/RPSA/SLC1A2/SYNPO2/TCF7L2/TEX11</i>    |
| GO:0006464 | cellular protein modification process | 27           | <i>AGBL1/AGBL4/B3GALNT1/B3GAT1/BTRC/COPS8/CP/DLG2/FZR1/GALNT18/GCSH/GFRA1/KITLG/MECOM/MINDY4/MUC19/PEAK1/PRKAR1B/PRKN/PTPN2/RFFL/SIRT3/ST8SIA2/TIPARP/TWF1/VRK3/ZDHHC14</i> |
| GO:0006950 | response to stress                    | 23           | <i>AGBL4/ARID1B/ARNT2/ARPP21/B3GAT1/BNIP3/BTRC/CHD2/COPS8/EHD1/EYS/FMR1/FZR1/GNA14/GRM7/HMGB1/IPCEF1/LILRA2/NME8/PRKAR1B/PRKN/SLC1A2/TERF2IP</i>                            |
| GO:0016192 | vesicle-mediated transport            | 21           | <i>ARL14/ARMC8/ATP8A1/CDC42SE1/DENND2A/EHD1/ELMO1/ERC2/GNAI3/HMGB1/KCNB1/KIF15/LDLRAD3/LRP1B/NHLRC2/NLGN1/PLD4/PLIN3/PRKN/RPH3AL/SCIN</i>                                   |
| GO:0007267 | cell-cell signaling                   | 20           | <i>ARID1B/BTRC/DIXDC1/DLG2/ERC2/GRID1/GRM7/HTR3B/INSYNI/LRRFIP2/MITF/NLGN1/PCSK5/PPFIA2/PRKN/RECK/SLC1A2/SV2B/TCF7L2/VAX2</i>                                               |
| GO:0009058 | biosynthetic process                  | 20           | <i>ACSBG1/AGPAT4/B3GALNT1/B3GAT1/BBOX1/EHF/ETV1/GALNT18/IDH2/LPIN1/MAML3/MITF/MUC19/PCSK5/PRPS1/RPSA/ST8SIA2/SYNJ2/TERF2IP/ZDHHC14</i>                                      |
| GO:0042592 | homeostatic process                   | 19           | <i>ABCG8/ATP2C2/BNIP3/CP/EHD1/EMX1/HMGB1/IDE/KCNB1/NHLRC2/NME8/OIT3/PRKAR1B/PRKN/PTPN2/RPH3AL/SLC9A9/TCF7L2/TERF2IP</i>                                                     |
| GO:0002376 | immune system process                 | 19           | <i>AGBL4/ARMC8/ATP8A1/BANK1/BNIP3/BTRC/CHD2/ELMO1/HMGB1/IDE/KIF15/KITLG/LILRA2/MECOM/MITF/MUC19/PLD4/PTPN2/TIPARP</i>                                                       |
| GO:0050877 | nervous system process                | 18           | <i>ABLIM1/ATP8A1/BCHE/CNTN5/COL11A1/DLG2/EYS/GRM7/HTR3B/INSYNI/NLGN1/OR4C12/PNKD/PRKAR1B/PRKN/RLBP1/SORCS3/VAX2</i>                                                         |
| GO:0009056 | catabolic process                     | 18           | <i>ADAMTS7/ARMC8/BNIP3/BTRC/ECE1/FZR1/GCSH/HMGB1/IDE/LPIN1/NEU4/PLD4/PNKD/PRKN/RFFL/RPSA/SYNJ2/SYNPO2</i>                                                                   |

| GO term ID | GO term definition                  | No. of genes | Genes                                                                                                              |
|------------|-------------------------------------|--------------|--------------------------------------------------------------------------------------------------------------------|
| GO:0015031 | protein transport                   | 17           | <i>AGAP1/ARL14/DENND2A/DLG2/DYNC2H1/EHD1/FRAS1/HMGB1/IDE/LRP1B/NLGN1/PCSK5/RPH3AL/RPSA/SLC15A2/TBC1D21/ZDHHC14</i> |
| GO:0055085 | transmembrane transport             | 15           | <i>ABCG8/ATP2C2/ATP8A1/CACNA2D3/GRID1/HTR3B/KCNB1/SLC15A2/SLC1A2/SLC28A3/SLC9A9/SLCO3A1/SV2B/TMC5/TMEM266</i>      |
| GO:0007155 | cell adhesion                       | 14           | <i>ADGRL3/CDH11/CNTN5/CNTNAP5/DLG2/DPT/HABP2/KITLG/LAMA3/NLGN1/PCDH9/PEAK1/PPFIA2/RPSA</i>                         |
| GO:0007010 | cytoskeleton organization           | 13           | <i>ABLIM1/ELMO1/INA/IQCG/LDB3/MAP2/NLGN1/NRAP/SCIN/SPECC1/SYNE1/TWF1/ZMYM3</i>                                     |
| GO:0006629 | lipid metabolic process             | 13           | <i>ACSBG1/AGPAT4/B3GALNT1/DGAT2L6/LPIN1/NEU4/OSBPL10/PLD4/PNLIPRP1/RLBP1/ST8SIA2/SYNJ2/TIPARP</i>                  |
| GO:0044281 | small molecule metabolic process    | 13           | <i>ACSBG1/AGPAT4/DLG2/FHIT/GCSH/GNAI3/IDH2/LPIN1/PLD4/PNKD/PRPS1/RLBP1/SYNJ2</i>                                   |
| GO:0000003 | reproduction                        | 12           | <i>FETUB/IQCG/KITLG/NME8/PCSK5/RECK/RXFP2/SPEF2/SYNE1/TBC1D21/TEX11/TIPARP</i>                                     |
| GO:0040011 | locomotion                          | 11           | <i>ADGRL3/DIXDC1/ELMO1/ETV1/GFRA1/HMGB1/IQCG/KITLG/LAMA3/NME8/PEAK1</i>                                            |
| GO:0065003 | protein-containing complex assembly | 11           | <i>COPS8/EHD1/ERC2/IDE/KCNB1/MITF/NLGN1/PRKN/RPSA/SLC1A2/TCF7L2</i>                                                |
| GO:0009790 | embryo development                  | 11           | <i>ARNT2/COL11A1/DYNC2H1/ECE1/EMX1/FRAS1/KITLG/LAMA3/PCSK5/RECK/VAX2</i>                                           |
| GO:0000902 | cell morphogenesis                  | 10           | <i>ARHGEF26/CDH11/EMX1/ETV1/FARP1/GFRA1/MAP2/NLGN1/PEAK1/VAX2</i>                                                  |
| GO:0007049 | cell cycle                          | 9            | <i>BTRC/FZR1/GNAI3/KIF15/LPIN1/PRCC/SEPTIN8/TCF7L2/TEX11</i>                                                       |
| GO:0008219 | cell death                          | 9            | <i>BNIP3/ELMO1/FHIT/HMGB1/KAZN/KITLG/MECOM/RELT/RFFL</i>                                                           |

| GO term ID | GO term definition                                       | No. of genes | Genes                                                           |
|------------|----------------------------------------------------------|--------------|-----------------------------------------------------------------|
| GO:0044403 | symbiotic process                                        | 9            | <i>BNIP3/BTRC/ELMO1/FMR1/IDE/PCSK5/PRKN/RANBP1/RPSA</i>         |
| GO:0048870 | cell motility                                            | 9            | <i>ADGRL3/DIXDC1/ELMO1/HMGB1/IQCG/KITLG/LAMA3/NME8/PEAK1</i>    |
| GO:0051276 | chromosome organization                                  | 9            | <i>ARID1B/CHD2/COPS8/HMGB1/MECOM/SIRT3/TCF7L2/TERF2IP/TEX11</i> |
| GO:0061024 | membrane organization                                    | 8            | <i>ATP10B/ATP8A1/BNIP3/ELMO1/GNAI3/LPIN1/NLGNI/SYNJ2</i>        |
| GO:0005975 | carbohydrate metabolic process                           | 7            | <i>B3GALNT1/B3GAT1/IDH2/NEU4/PGGHG/ST8SIA2/SYNJ2</i>            |
| GO:0006259 | DNA metabolic process                                    | 6            | <i>COPS8/FZR1/HMGB1/TCF7L2/TERF2IP/TEX11</i>                    |
| GO:0048646 | anatomical structure formation involved in morphogenesis | 5            | <i>COL11A1/LAMA3/LDB3/NRAP/RECK</i>                             |
| GO:0030198 | extracellular matrix organization                        | 5            | <i>ABI3BP/COL11A1/DPT/LAMA3/RECK</i>                            |
| GO:0040007 | growth                                                   | 4            | <i>EMX1/EYS/OSTN/SLC1A2</i>                                     |
| GO:0008283 | cell population proliferation                            | 4            | <i>BTRC/DIXDC1/EHF/MECOM</i>                                    |
| GO:0006397 | mRNA processing                                          | 4            | <i>FMR1/MBNL3/PRCC/RBM20</i>                                    |
| GO:0006605 | protein targeting                                        | 4            | <i>IDE/NLGNI/RPSA/ZDHHC14</i>                                   |
| GO:0051301 | cell division                                            | 4            | <i>DIXDC1/FZR1/GNAI3/SEPTIN8</i>                                |
| GO:0051604 | protein maturation                                       | 4            | <i>DYNC2H1/ECE1/GCSH/PCSK5</i>                                  |
| GO:0000278 | mitotic cell cycle                                       | 4            | <i>BTRC/KIF15/LPIN1/PRCC</i>                                    |
| GO:0006914 | autophagy                                                | 4            | <i>BNIP3/HMGB1/PRKN/SYNPO2</i>                                  |

| GO term ID | GO term definition                               | No. of genes | Genes                    |
|------------|--------------------------------------------------|--------------|--------------------------|
| GO:0007005 | mitochondrion organization                       | 3            | <i>BNIP3/PRKN/SIRT3</i>  |
| GO:0030705 | cytoskeleton-dependent intracellular transport   | 3            | <i>DLG2/DYNC2H1/FMR1</i> |
| GO:0006091 | generation of precursor metabolites and energy   | 3            | <i>FAHD1/IDH2/SIRT3</i>  |
| GO:0034330 | cell junction organization                       | 3            | <i>CDH11/LAMA3/PEAK1</i> |
| GO:0007568 | aging                                            | 3            | <i>IDE/SIRT3/SLC1A2</i>  |
| GO:0021700 | developmental maturation                         | 2            | <i>RECK/RXFP2</i>        |
| GO:0051186 | cofactor metabolic process                       | 2            | <i>ACSBG1/IDH2</i>       |
| GO:0034655 | nucleobase-containing compound catabolic process | 2            | <i>HMGB1/RPSA</i>        |
| GO:0003013 | circulatory system process                       | 2            | <i>ECE1/PCSK5</i>        |
| GO:0042254 | ribosome biogenesis                              | 2            | <i>BTRC/RPSA</i>         |
| GO:0006412 | translation                                      | 1            | <i>RPSA</i>              |
| GO:0043473 | pigmentation                                     | 1            | <i>MITF</i>              |
| GO:0007059 | chromosome segregation                           | 1            | <i>TEX11</i>             |
| GO:0006457 | protein folding                                  | 1            | <i>GNAI3</i>             |
| GO:0022618 | ribonucleoprotein complex assembly               | 1            | <i>RPSA</i>              |
| GO:0006520 | cellular amino acid metabolic process            | 1            | <i>GCSH</i>              |

| GO term ID | GO term definition                   | No. of genes | Genes         |
|------------|--------------------------------------|--------------|---------------|
| GO:0006790 | sulfur compound metabolic process    | 1            | <i>ACSBG1</i> |
| GO:0007034 | vacuolar transport                   | 1            | <i>PRKN</i>   |
| GO:0006399 | tRNA metabolic process               | 0            |               |
| GO:0032196 | transposition                        | 0            |               |
| GO:0019748 | secondary metabolic process          | 0            |               |
| GO:0015979 | photosynthesis                       | 0            |               |
| GO:0006913 | nucleocytoplasmic transport          | 0            |               |
| GO:0007009 | plasma membrane organization         | 0            |               |
| GO:0071554 | cell wall organization or biogenesis | 0            |               |
| GO:0071941 | nitrogen cycle metabolic process     | 0            |               |
| GO:0140014 | mitotic nuclear division             | 0            |               |

**Table S5.** Gene ontology (GO) term annotation of gene families significantly expanded, as determined by the CAFE analysis, in the Ninu.

| GO term ID | GO term definition                           | Number of genes | Genes                                                                                                                                                                                                                                                                                                                                                                                                                                                                                                                                                                                                                                                                                                                                                                                                                                                                                                                                                                                                                   |
|------------|----------------------------------------------|-----------------|-------------------------------------------------------------------------------------------------------------------------------------------------------------------------------------------------------------------------------------------------------------------------------------------------------------------------------------------------------------------------------------------------------------------------------------------------------------------------------------------------------------------------------------------------------------------------------------------------------------------------------------------------------------------------------------------------------------------------------------------------------------------------------------------------------------------------------------------------------------------------------------------------------------------------------------------------------------------------------------------------------------------------|
| GO:0006810 | transport                                    | 155             | <i>AAGAB/ABCG2/ACAP2/ADA/ALOX15/AP2S1/APOOL/ARF1/ATP5F1B/ATP5F1D/ATP5MC2/ATP5ME/ATP5MF/ATP5MG/ATP5PB/ATP6V0C/ATP6V1C1/ATP6V1E1/ATP6V1G2/B2M/CALM1/CAPZA1/CCDC91/CT5/CD59/CDD/CES1/CHP1/CLNS1A/COX10/COX5B/COX6A1/COX6C/COX7A1/COX7B/COX7C/CRAT/CST3/DNAJA1/DNAJC19/DYNC1I2/EBP1/EIF2S2/EIF2S3/EIF4A3/ENDOU/FABP5/FAM3C/FFAR1/FKBP1A/FKBP4/FXN/GDI1/GLUL/GOT2/HMGA1/HMGB1/HNRNPA1/HSPA8/IL1RN/IMMP2L/LAMTOR1/LAMTOR3/LAPT4B/LMBRD1/MAGED2/MPC2/MPV17L/MTX2/NDUFA4/NLRP3/NME2/NME4/NMT1/OSBP/P2RX2/PDXK/PHB2/PRDX6/PRELID3B/RAN/RNPS1/RPL12/RPL13/RPL14/RPL17/RPL18/RPL21/RPL22/RPL23/RPL23A/RPL27/RPL27A/RPL28/RPL29/RPL32/RPL35/RPL35A/RPL38/RPL4/RPL5/RPL6/RPL8/RPL9/RPLP0/RPLP1/RPS10/RPS11/RPS12/RPS14/RPS15A/RPS19/RPS2/RPS21/RPS23/RPS24/RPS27/RPS27A/RPS29/RPS4X/RPSA/S100A7/SELENOK/SFTPD/SLC11A1/SLC15A2/SLC19A3/SLC25A21/SLC25A40/SLC25A42/SLC25A6/SLC2A3/SLC3A2/SLPI/SNRPD1/SNRPE/SQSTM1/SRP14/SYP/TAF7/TIMM23/TMEM129/TMEM14A/TMEM14C/TMSB4/TOMM40/TPT1/UBE2D2/UBE2D3/UCP2/UPRT/VDAC1/VDAC3/WASHC3/YWHAQ</i> |
| GO:0034641 | cellular nitrogen compound metabolic process | 147             | <i>ABCG2/ADA/ADAD1/AHCY/AK2/AK3/AK4/AK6/ATIC/ATP5F1B/ATP5F1D/ATP5MC2/ATP5ME/ATP5MF/ATP5MG/ATP5PB/C1QBP/CACTIN/CDD/CES1/CINP/CLNS1A/COX10/COX5B/CPSF6/CRAT/DBI/DIMT1/DPH3/DUT/EBP1/EEF1B/EIF1AX/EIF2S2/EIF2S3/EIF3F/EIF3M/EIF4A3/EIF4H/ENDOU/ENO1/FCF1/FRG1/FXN/GAPDH/GINS2/GNPDA1/HMGA1/HMGB1/HNRNPA1/HSPA8/IMMP2L/LSM4/LSM6/MDC1/MED7/METTL15/MPC2/MRPL22/MRPL30/MRPL35/MRPS18B/NAXD/NIFK/NME2/NME4/NPM3/NRBF2/ODC1/PARP1/PDXK/PLAAT3/POU5F1/PRORS1P/PRPS2/PTS/RAMAC/RAN/RNASE1/RNPS1/RPA2/RPL12/RPL13/RPL14/RPL17/RPL18/RPL21/RPL22/RPL23/RPL23A/RPL27/RPL27A/RPL28/RPL29/RPL32/RPL35/RPL35A/RPL38/RPL4/RPL5/RPL6/RPL7L1/RPL8/RPL9/RPLP0/RPLP1/RPS10/RPS11/RPS12/RPS14/RPS15A/RPS19/RPS2/RPS21/RPS23/RPS24/RPS27/RPS27A/RPS29/RPS4X/RPSA/RSL1D1/SCD/SLC19A3/SMNDC1/SNRPA/SNRPD1/SNRPE/SPTLC1/SRD5A1/SULT1A1/TAF7/TARDBP/TFAM/TMEM14C/TPI1/TSR2/UBE2D3/UBE2N/UGDH/UNG/UPRT/WDR4/WDR77/YBX1/ZNF326</i>                                                                                                                  |
| GO:0009058 | biosynthetic process                         | 132             | <i>ABHD17C/ADA/AK2/AK3/AK4/AK6/ALOX15/ARF1/ATIC/ATP5F1B/ATP5F1D/ATP5MC2/ATP5ME/ATP5MF/ATP5MG/ATP5PB/C1GALT1/CDD/CDK2AP1/CES1/CINP/CKB/CNBP/COX10/COX5B/DBF4/DBI/DPH3/DUT/EEF1B/EIF1AX/EIF2S2/EIF2S3/EIF3F/EIF3M/EIF4H/ENO1/ESD/FABP5/FUT9/FXN/GAPDH/GATM/GINS2/GLUL/GNPDA1/GOT2/HAS1/HMGA1/HSD11B2/MDH1/ME1/MED7/MPC2/MRPL22/MRPL30/MRPL35/MRPS18B/NAP1L1/NAXD/NDUFAB1/NIFK/NME2/NME4/NMT1/NPM3/NRBF2/ODC1/OSBP/PARP1/PDXK/PIGP/PLAAT3/POU5F1/PRPS2/PTS/RNPS1/RPA2/RPL12/RPL13/RPL14/RPL17/RPL18/RPL21/RPL22/RPL23/RPL23A/RPL27/RPL27A/RPL28/RPL29/RPL32/RPL35/RPL35A/RPL38/RPL4/RPL5/RP</i>                                                                                                                                                                                                                                                                                                                                                                                                                            |

| GO term ID | GO term definition               | Number of genes | Genes                                                                                                                                                                                                                                                                                                                                                                                                                                                                                                                                                  |
|------------|----------------------------------|-----------------|--------------------------------------------------------------------------------------------------------------------------------------------------------------------------------------------------------------------------------------------------------------------------------------------------------------------------------------------------------------------------------------------------------------------------------------------------------------------------------------------------------------------------------------------------------|
|            |                                  |                 | <i>L6/RPL8/RPL9/RPLP0/RPLP1/RPS10/RPS11/RPS12/RPS14/RPS15A/RPS19/RPS2/RPS21/RPS23/RPS24/RPS27/RPS27A/RPS29/RPS4X/RPSA/SCD/SELENOK/SLC11A1/SNRPE/SPTLC1/SRD5A1/TAF7/TARDBP/TFAM/TMEM14C/TPI1/UGDH/UNG/UPRT/YBX1</i>                                                                                                                                                                                                                                                                                                                                     |
| GO:0009056 | catabolic process                | 89              | <i>ABHD17C/ADA/AHCY/AP2S1/CALM1/CDD/CES1/CHP1/CRAT/CUL1/DUT/EIF4A3/ENO1/ESD/FABP5/FBXO27/FUNDC2/FUT9/GALM/GAPDH/GLUL/GNPDA1/GOT2/HMGB1/HSPA8/LSM4/LSM6/LYPLA1/NRBF2/PLAAT3/PRDX3/PRDX6/RNF13/RNF34/RNPS1/RPL12/RPL13/RPL14/RPL17/RPL18/RPL21/RPL22/RPL23/RPL23A/RPL27/RPL27A/RPL28/RPL29/RPL32/RPL35/RPL35A/RPL38/RPL4/RPL5/RPL6/RPL8/RPL9/RPLP0/RPLP1/RPS10/RPS11/RPS12/RPS14/RPS15A/RPS19/RPS2/RPS21/RPS23/RPS24/RPS27/RPS27A/RPS29/RPS4X/RPSA/SKP1/SLC25A21/SQSTM1/SRD5A1/SULT1A1/TMEM129/TOMM40/TPI1/UBE2C/UBE2D2/UBE2D3/UBE2N/UCHL3/UNG/VDAC1</i> |
| GO:0048856 | anatomical structure development | 84              | <i>ABITRAM/ADA/ADAD1/AK4/ALOX15/ARF1/ATIC/ATP5F1B/ATP5PB/B2M/BMP2/BSG/C1GALT1/CACTIN/CACYBP/CALM1/CCNA2/CCR4/CES1/CKB/COX7B/CUL1/DAZL/DNAJB6/DNAJC19/E2F4/EIF2S2/EIF4A3/ELF5/FABP5/FAM3C/FKBP1A/FKBP4/FMN1/FOXH1/FRG1/FUT9/FXN/GATM/GDI1/GLUL/GOT2/HMGB1/IMMP2L/KCTD15/KRTAP11-1/LLPH/MAD1L1/MAPK6/MEA1/MOG/MYADM/NANOG/NAP1L1/NDRG2/NDUFV2/NME2/NMT1/ODC1/P2RX2/PARP1/PHB2/POU5F1/PRDX3/PTS/RPL22/RPL29/RPL38/RPL7L1/RPS14/RPS19/RPS4X/S100A7/SFTPD/SRD5A1/TMEM14C/TPI1/TWF1/UGDH/UNG/UPRT/VDAC1/WDR77/YWHAQ</i>                                      |
| GO:0022607 | cellular component assembly      | 81              | <i>AIF1L/AP2S1/ARF1/ATP5F1D/B2M/BIRC5/C1QBP/CAPZA1/CD59/CDD/CENPA/CHP1/CLNS1A/COX10/COX7A1/CPSF6/CUL1/DYNC1I2/E2F4/EIF2S2/EIF2S3/EIF3F/EIF3M/EIF4H/EPPIN/FKBP1A/FKBP4/FXN/GATAD1/GBP1/GLUL/HAS1/HMGA1/IMMP2L/KCTD15/LSM4/ME1/MRPL22/MT-ND6/NAP1L1/NDUFA11/NDUFA12/NDUFA3/NDUFAB1/NDUFAB4/NDUFB4/NDUFB5/NDUFV2/NIFK/NLRP3/NME2/OCLN/P2RX2/PARP1/POMP/RAMAC/RPA2/RPL12/RPL23A/RPL38/RPL5/RPL6/RPLP0/RPS10/RPS14/RPS19/RPS23/RPS27/RPS27A/RPSA/SKP1/SNRPD1/SNRPE/SQSTM1/TAF7/TFAM/UBE2C/UGDH/UQCRB/WASHC3/WDR77</i>                                       |
| GO:0006950 | response to stress               | 80              | <i>ADA/ADGRE2/AHCY/AK3/AK4/ALOX15/B2M/BMP2/C1QBP/CACTIN/CAPZA1/CCL4/CCNA2/CCR4/CD59/CINP/CST3/CUL1/CYCS/DNAJA1/E2F4/EPPIN/FBXO27/FXN/GAPDH/GBP1/GINS2/GLUL/HIGD1A/HLA-A/HLA-DQB1/HMGA1/HMGB1/HNRNPA1/HSD11B2/HSPA8/IL1RN/IMMP2L/MDC1/MT-ND6/MYL12A/NDUFA12/NDUFB4/NLRP3/NME2/NRBF2/OAS1/OSER1/P2RX2/PARP1/PDK4/PHB2/POU5F1/PRDX3/PRDX6/RNASE1/RNF34/RPA2/RPS19/RPS27A/S100A7/SD/SELENOK/SFTPD/SHISA5/SKP1/SLC11A1/SLPI/SQSTM1/SRD5A1/SUV39H2/TARDBP/TIPRL/TMEM129/UBE2D3/UBE2N/UCP2/UNG/VDAC1/VDAC3</i>                                                |



| GO term ID | GO term definition                  | Number of genes | Genes                                                                                                                                                                                                                                                                                                                                                                                                                                                                                                 |
|------------|-------------------------------------|-----------------|-------------------------------------------------------------------------------------------------------------------------------------------------------------------------------------------------------------------------------------------------------------------------------------------------------------------------------------------------------------------------------------------------------------------------------------------------------------------------------------------------------|
| GO:0007165 | signal transduction                 | 79              | <i>ADGRE2 ALOX15 AP2S1 APH1B ARF1 ARHGAP32 ARL2BP ATP6V0C ATP6V1C1 ATP6V1E1 ATP6V1G2 B2M BIRC5 BMP2 BSG CIQBP CALM1 CAPZA1 CCL4 CCNA2 CCR4 CD59 CDD CHP1 CUL1 DNAJA1 E2F4 ENDOU FAM3C FFAR1 FKBP1A FKBP4 FOXH1 GBP1 GDI1 GNG5 HLA-A HLA-DQB1 HMGB1 HNRNPA1 HSPA8 IL1RN IRAK1BP1 LAMTOR3 MAPK6 MOG NANOG NDRG2 NLRP3 NME2 OAS1 OR1D2 OR1D5 P2RX2 PARP1 PKD4 PEBP1 PKIG RAN RNF34 RPLP0 RPS19 RPS27A SD SELENOK SFTPD SHISA5 SKP1 SQSTM1 SUB1 TAF7 TIPRL TMSB4 UBE2D2 UBE2D3 UBE2N VN1R4 YBX1 YWHAQ</i> |
| GO:0065003 | protein-containing complex assembly | 74              | <i>AP2S1 ARF1 ATP5F1D B2M CIQBP CAPZA1 CD59 CDD CENPA CHP1 CLNS1A COX10 COX7A1 CPSF6 CUL1 EIF2S2 EIF2S3 EIF3F EIF3M EIF4H EPPIN FKBP1A FKBP4 GBP1 GLUL HMGA1 IMMP2L KCTD15 LSM4 ME1 MRPL22 MT-ND6 NAP1L1 NDUFA11 NDUFA12 NDUFA3 NDUFAB1 NDUFAB4 NDUFB4 NDUFB5 NDUFV2 NIFK NLRP3 NME2 OCLN P2RX2 PARP1 POMP RAMAC RPA2 RPL12 RPL23A RPL38 RPL5 RPL6 RPLP0 RPS10 RPS14 RPS19 RPS23 RPS27 RPS27A RPSA SKP1 SNRPD1 SNRPE SQSTM1 TAF7 TFAM UBE2C UGDH UQCRB WASHC3 WDR77</i>                               |
| GO:0044281 | small molecule metabolic process    | 73              | <i>ABCG2 ADA AHCY AK2 AK3 AK4 AK6 ALOX15 ATIC ATP5F1B ATP5F1D ATP5MC2 ATP5ME ATP5MF ATP5MG ATP5PB BSG CALM1 CDD CES1 CHP1 CKB CNBP COX5B CRAT DBI DUT ENO1 ESD FABP5 FUT9 FXN GALM GAPDH GATM GLUL GNPDA1 GOT2 HAS1 IDH3A LMBRD1 LYPLA1 MDH1 ME1 MPC2 NAXD NDUFAB1 NME2 NME4 NMT1 OAS1 ODC1 OSBP PDK4 PDXX PLAAT3 PRPS2 PTS RAN RPIA SCD SLC19A3 SLC25A21 SLC2A3 SPTLC1 SRD5A1 SULT1A1 TP11 TXN UGDH UNG UPRT VDAC1</i>                                                                               |
| GO:0015031 | protein transport                   | 72              | <i>AAGAB AP2S1 ARF1 ATP6V0C ATP6V1C1 ATP6V1E1 ATP6V1G2 CCDC91 CHP1 CRAT DNAJC19 EIF4A3 FFAR1 GDI1 HMGB1 HSPA8 IL1RN IMMP2L MTX2 NLRP3 PHB2 RAN RNPS1 RPL12 RPL13 RPL14 RPL17 RPL18 RPL21 RPL22 RPL23 RPL23A RPL27 RPL27A RPL28 RPL29 RPL32 RPL35 RPL35A RPL38 RPL4 RPL5 RPL6 RPL8 RPL9 RPLP0 RPLP1 RPS10 RPS11 RPS12 RPS14 RPS15A RPS19 RPS2 RPS21 RPS23 RPS24 RPS27 RPS27A RPS29 RPS4X RPSA SLC15A2 SLC25A6 SRP14 TIMM23 TMEM129 TOMM40 UBE2D2 UBE2D3 WASHC3 YWHAQ</i>                               |
| GO:0044403 | symbiotic process                   | 67              | <i>AP2S1 ARF1 ATP6V0C B2M CIQBP CALM1 CCL4 CCNA2 CENPA CUL1 DYNC112 EIF3F EIF4H GAPDH HAVCR1 HMGA1 HNRNPA1 HSPA8 LAMTOR5 LMBRD1 MOG RAN RPL12 RPL13 RPL14 RPL17 RPL18 RPL21 RPL22 RPL23 RPL23A RPL27 RPL27A RPL28 RPL29 RPL32 RPL35 RPL35A RPL38 RPL4 RPL5 RPL6 RPL8 RPL9 RPLP0 RPLP1 RPS10 RPS11 RPS12 RPS14 RPS15A RPS19 RPS2 RPS21 RPS23 RPS24 RPS27 RPS27A RPS29 RPS4X RPSA SFTPD SKP1 SLC25A6 TARDBP UNG VDAC1</i>                                                                               |

| GO term ID | GO term definition                               | Number of genes | Genes                                                                                                                                                                                                                                                                                                                                                                                                            |
|------------|--------------------------------------------------|-----------------|------------------------------------------------------------------------------------------------------------------------------------------------------------------------------------------------------------------------------------------------------------------------------------------------------------------------------------------------------------------------------------------------------------------|
| GO:0002376 | immune system process                            | 64              | <i>ADA/ADGRE2/AHCY/AP2S1/ARF1/ATP6V0C/B2M/BSG/C1QBP/CACTIN/CAPZA1/CCL4/CCR4/CD59/CD D/CST3/CUL1/DYNC1I2/EBP1/ENDOU/EPPIN/FABP5/FKBP1A/GAPDH/GBP1/HLA-A/HLA-DQB1/HMGB1/HMGN2/HSPA8/IL1RN/IRAK1BP1/LAMTOR1/LAMTOR3/MAD1L1/MOG/NLRP3/NME2/O AS1/PARP1/PDXK/PRDX3/PRDX6/RNASE1/RPL22/RPS14/RPS19/RPS24/RPS27A/S100A7/SELENOK/SFT PD/SKP1/SLC11A1/SLC2A3/SLC3A2/SLPI/SQSTM1/SRP14/TMEM14C/UBE2D2/UBE2D3/UBE2N/UNG</i> |
| GO:0006464 | cellular protein modification process            | 54              | <i>ABHD17C/ACP1/BIRC5/BMP2/C1GALT1/CALM1/CCNA2/CCNG1/CST3/CUL1/CYCS/DBI/DPH3/EIF3F/FBXO27/FKBP1A/FKBP4/FUT9/FXN/GAPDH/GLUL/HECTD2/LAMTOR3/LYPLA1/MAPK6/MED7/NDU FAB1/NLRP3/NME2/NMT1/PARP1/PDK4/PEBP1/PIGP/PIN4/PRDX3/RNF13/RNF34/RNFT1/RPS27A/SD/ SELENOK/SHISA5/SKP1/SQSTM1/SUMO2/SUV39H2/TMEM129/TWF1/UBE2C/UBE2D2/UBE2D3/UBE2 N/UCHL3</i>                                                                    |
| GO:0006605 | protein targeting                                | 50              | <i>CRAT/DNAJC19/HSPA8/IMMP2L/RPL12/RPL13/RPL14/RPL17/RPL18/RPL21/RPL22/RPL23/RPL23A/RP L27/RPL27A/RPL28/RPL29/RPL32/RPL35/RPL35A/RPL38/RPL4/RPL5/RPL6/RPL8/RPL9/RPLP0/RPLP1/ RPS10/RPS11/RPS12/RPS14/RPS15A/RPS19/RPS2/RPS21/RPS23/RPS24/RPS27/RPS27A/RPS29/RPS4X/R PSA/SLC25A6/SRP14/TIMM23/TOMM40/UBE2D2/UBE2D3/YWHAQ</i>                                                                                      |
| GO:0006412 | translation                                      | 50              | <i>EEF1B/EIF1AX/EIF2S2/EIF2S3/EIF3F/EIF3M/EIF4H/MRPL22/MRPL30/MRPL35/MRPS18B/RPL12/RPL 13/RPL14/RPL17/RPL18/RPL21/RPL22/RPL23/RPL23A/RPL27/RPL27A/RPL28/RPL29/RPL32/RPL35/RP L35A/RPL38/RPL4/RPL5/RPL6/RPL8/RPL9/RPLP0/RPLP1/RPS10/RPS11/RPS12/RPS14/RPS15A/RPS19/R PS2/RPS21/RPS23/RPS24/RPS27/RPS27A/RPS29/RPS4X/RPSA</i>                                                                                      |
| GO:0034655 | nucleobase-containing compound catabolic process | 49              | <i>ADA/AHCY/CDD/DUT/EIF4A3/HMGB1/LSM4/LSM6/RNPS1/RPL12/RPL13/RPL14/RPL17/RPL18/RPL21/ RPL22/RPL23/RPL23A/RPL27/RPL27A/RPL28/RPL29/RPL32/RPL35/RPL35A/RPL38/RPL4/RPL5/RPL6/R PL8/RPL9/RPLP0/RPLP1/RPS10/RPS11/RPS12/RPS14/RPS15A/RPS19/RPS2/RPS21/RPS23/RPS24/RPS27 /RPS27A/RPS29/RPS4X/RPSA/UNG</i>                                                                                                              |
| GO:0030154 | cell differentiation                             | 46              | <i>ABITRAM/ADA/ADAD1/ARF1/ATP5F1B/B2M/BMP2/BSG/C1GALT1/CACYBP/CCR4/CES1/DAZL/DNAJB 6/E2F4/ELF5/FKBP4/GDI1/HMGB1/KRTAP11- 1/LLPH/MAPK6/MEA1/MYADM/NANOG/NAP1L1/NDRG2/NME2/P2RX2/PARP1/POU5F1/PRDX3/RPL22 /RPS14/RPS19/RSL1D1/S100A7/SELENOK/SQSTM1/SRD5A1/SUV39H2/TMEM14C/TPM4/TWF1/VDAC1/ WDR77</i>                                                                                                              |
| GO:0055085 | transmembrane                                    | 43              | <i>ABCG2/ATP5F1B/ATP5F1D/ATP5MC2/ATP5ME/ATP5MF/ATP5MG/ATP5PB/ATP6V0C/ATP6V1C1/ATP</i>                                                                                                                                                                                                                                                                                                                            |

| GO term ID | GO term definition                             | Number of genes | Genes                                                                                                                                                                                                                                                             |
|------------|------------------------------------------------|-----------------|-------------------------------------------------------------------------------------------------------------------------------------------------------------------------------------------------------------------------------------------------------------------|
|            | transport                                      |                 | <i>6V1E1 ATP6V1G2 COX10 COX5B COX6A1 COX6C COX7A1 COX7B COX7C DNAJC19 EIF2S2 EIF2S3 FKBP1A HSPA8 MPC2 NDUFA4 P2RX2 PHB2 RPS27A SLC11A1 SLC15A2 SLC19A3 SLC25A21 SLC25A40 SLC25A42 SLC25A6 SLC2A3 SLC3A2 TIMM23 TOMM40 UCP2 VDAC1 VDAC3</i>                        |
| GO:0016192 | vesicle-mediated transport                     | 41              | <i>ACAP2 ALOX15 AP2S1 APOOL ARF1 ATP6V0C B2M CALM1 CAPZA1 CCDC91 CD59 CDD CES1 CHP1 CST3 DYNC1I2 EBP1 ENDOU FABP5 FAM3C GDI1 HMGB1 HSPA8 LAMTOR1 LAMTOR3 LAPTM4B MAGED2 NME2 PDXK PRDX6 RPS27A S100A7 SFTPD SLC11A1 SLC2A3 SLPI SQSTM1 SRP14 SYP TMSB4 WASHC3</i> |
| GO:0042592 | homeostatic process                            | 39              | <i>ABCG2 ARF1 ATP5F1B ATP6V0C ATP6V1C1 ATP6V1E1 ATP6V1G2 B2M CALM1 CCR4 CHP1 CKB CLNS1A CUL1 E2F4 FABP5 FFAR1 FXN HMGB1 LAMTOR1 NME2 OAS1 P2RX2 PARP1 PDK4 PRDX3 PRDX6 RPA2 RPS14 RPS19 RPS24 SELENOK SFTPD SKP1 SLC11A1 TMEM14C TPT1 TXN UBE2C</i>               |
| GO:0006091 | generation of precursor metabolites and energy | 38              | <i>ATP5F1B ATP5F1D ATP5MC2 ATP5ME ATP5MF ATP5MG ATP5PB CALM1 COX10 COX5B COX6A1 COX6C COX7A1 COX7B COX7C CYCS ENO1 FXN GAPDH GNPDA1 IDH3A IMMP2L MDH1 ME1 MTND6 NDUFA11 NDUFA12 NDUFA3 NDUFA4 NDUFAB1 NDUFB4 NDUFB5 NDUFV2 RPIA SDHD SRD5A1 TPI1 UQCRB</i>        |
| GO:0007005 | mitochondrion organization                     | 37              | <i>APOOL ATP5F1B ATP5F1D ATP5MC2 ATP5ME ATP5MF ATP5MG ATP5PB COX10 COX7A1 CYCS DNAJC19 FUNDC2 FXN IMMP2L MPV17L MTND6 NDUFA11 NDUFA12 NDUFA3 NDUFAB1 NDUFAB4 NDUFB4 NDUFB5 NDUFV2 NMT1 PARP1 PHB2 PRDX3 SLC25A6 SQSTM1 TFAM TIMM23 TMEM14A TOMM40 UQCRB YWHAQ</i> |
| GO:0042254 | ribosome biogenesis                            | 34              | <i>C1QBP DIMIT1 EBP1 EIF4A3 FCF1 FRG1 GLUL LSM6 METTL15 MRPL22 NPM3 RAN RIOX2 RPL12 RPL14 RPL23A RPL27 RPL35 RPL35A RPL38 RPL5 RPL6 RPL7L1 RPLP0 RPS10 RPS14 RPS19 RPS2 RPS21 RPS24 RPS27 RPSA RSL1D1 TSR2</i>                                                    |
| GO:0007049 | cell cycle                                     | 28              | <i>ARF1 BIRC5 CCNA2 CCNG1 CDK2AP1 CENPA CINP CKS2 CUL1 DAZL DBF4 DYNC1I2 DYNLT3 E2F4 LAMTOR1 LAMTOR3 LAMTOR5 MAD1L1 MAPK6 MDC1 PHB2 RAN RPA2 SKA2 SKP1 SPC24 SUV39H2 UBE2C</i>                                                                                    |
| GO:0000003 | reproduction                                   | 27              | <i>ADA ADAD1 BSG CCT5 CKS2 DAZL DNAJA1 DNAJB6 DNAJC19 EIF2S2 EIF4H ENDOU FKBP4 GNPDA1 GOT2 HAS1 HSD11B2 IMMP2L MAGED2 MEA1 OR1D2 PHB2 PRDX3 RPL29 SRD5A1 UPRT WDR77</i>                                                                                           |
| GO:0022618 | ribonucleoprotein complex                      | 26              | <i>C1QBP CLNS1A CPSF6 EIF2S2 EIF2S3 EIF3F EIF3M EIF4H LSM4 MRPL22 RAMAC RPL12 RPL23A RPL38 RPL5 RPL6 RPLP0 RPS10 RPS14 RPS19 RPS23 RPS27 RPSA SNRPD1 SNRPE WDR77</i>                                                                                              |

| GO term ID | GO term definition             | Number of genes | Genes                                                                                                                                                 |
|------------|--------------------------------|-----------------|-------------------------------------------------------------------------------------------------------------------------------------------------------|
|            | assembly                       |                 |                                                                                                                                                       |
| GO:0061024 | membrane organization          | 22              | <i>AP2S1/APOOL/ARF1/ATP5F1B/ATP5F1D/ATP5MC2/ATP5ME/ATP5MF/ATP5MG/ATP5PB/CD59/CHP1/HSPA8/LAPTM4B/MPV17L/MYADM/NMT1/RPS27A/SYP/TARDBP/TMEM14A/YWHAQ</i> |
| GO:0008219 | cell death                     | 21              | <i>API5/BIRC5/C1QBP/CASP7/CUL1/CYCS/GAPDH/HMGB1/NLRP3/PARP1/PDCD5/PRDX3/RNF34/SELE NOK/SHISA5/SLC25A6/SMNDC1/SQSTM1/TMEM14A/UBE2D3/VDAC1</i>          |
| GO:0006629 | lipid metabolic process        | 20              | <i>ALOX15/ARF1/ATP5F1B/CES1/CNBP/CRAT/DBI/FABP5/HSD11B2/IL1RN/LYPLA1/NDUFAB1/OSBP/PI GP/PLAAT3/PRDX6/SCD/SPTLC1/SRD5A1/SULT1A1</i>                    |
| GO:0006397 | mRNA processing                | 20              | <i>C1QBP/CACTIN/CLNS1A/CPSF6/EIF4A3/FRG1/HNRNPA1/HSPA8/LSM4/LSM6/RAMAC/RNPS1/SMNDC 1/SNRPA/SNRPD1/SNRPE/TARDBP/WDR77/YBX1/ZNF326</i>                  |
| GO:0005975 | carbohydrate metabolic process | 20              | <i>CALM1/ENO1/FABP5/FUT9/GALM/GAPDH/GNPDA1/GOT2/HAS1/IDH3A/MDH1/ME1/OAS1/PDK4/RPI A/SI/SLC2A3/SLC3A2/TPI1/UGDH</i>                                    |
| GO:0051186 | cofactor metabolic process     | 17              | <i>AHCY/ATIC/CALM1/COX10/DBI/FXN/GOT2/LMBRD1/MPC2/NAXD/PDXK/PRDX3/PRDX6/PTS/SCD/SL C2A3/TMEM14C</i>                                                   |
| GO:0051276 | chromosome organization        | 17              | <i>CCNA2/CENPA/GATAD1/GINS2/HMGA1/HMGB1/MAD1L1/NAP1L1/NPM3/PARP1/PHB2/RAN/RPA2/RP S27A/SKP1/SUV39H2/UBE2N</i>                                         |
| GO:0000278 | mitotic cell cycle             | 17              | <i>ARF1/BIRC5/CCNA2/CCNG1/CENPA/CKS2/CUL1/DBF4/DYNC1I2/E2F4/MAD1L1/MDC1/RAN/RPA2/SK A2/SKP1/UBE2C</i>                                                 |
| GO:0007010 | cytoskeleton organization      | 15              | <i>AIF1L/ARF1/BIRC5/CAPZA1/CENPA/CHP1/DNAJB6/E2F4/FMN1/GAPDH/RAN/TMSB4/TPM4/TWF1/W ASHC3</i>                                                          |
| GO:0009790 | embryo development             | 14              | <i>ADA/BMP2/DNAJB6/EIF2S2/EIF4A3/ELF5/FOXH1/FXN/NANOG/NMT1/POU5F1/RPL38/RPL7L1/UGDH</i>                                                               |
| GO:0007267 | cell-cell signalling           | 14              | <i>AP2S1/BMP2/CALM1/CCL4/CUL1/FFAR1/HSPA8/IL1RN/NDRG2/P2RX2/RPS27A/SKP1/VDAC1/VDAC3</i>                                                               |

| GO term ID | GO term definition                                       | Number of genes | Genes                                                                             |
|------------|----------------------------------------------------------|-----------------|-----------------------------------------------------------------------------------|
| GO:0051301 | cell division                                            | 13              | <i>ARF1 BIRC5 CCNA2 CCNG1 CENPA CINP CKS2 DYNLT3 MAD1L1 RAN SKA2 SPC24 UBE2C</i>  |
| GO:0040011 | locomotion                                               | 12              | <i>ADGRE2 ATP5F1B BSG CCL4 CCR4 DNAJA1 HMGB1 IL1RN OR1D2 RPS19 SFTPD SLC3A2</i>   |
| GO:0050877 | nervous system process                                   | 12              | <i>B2M BIRC5 DNAJC19 EIF4A3 FXN GATM OR1D2 OR1D5 P2RX2 RPL38 VDAC1 VDAC3</i>      |
| GO:0048646 | anatomical structure formation involved in morphogenesis | 12              | <i>ADA ATP5F1B C1GALT1 ELF5 FKBP1A FMN1 FOXH1 GLUL NANOG POU5F1 RPL7L1 S100A7</i> |
| GO:0006259 | DNA metabolic process                                    | 12              | <i>CINP GINS2 HMGA1 HMGB1 MDC1 PARP1 RAN RPA2 RPS27A UBE2D3 UBE2N UNG</i>         |
| GO:0007155 | cell adhesion                                            | 11              | <i>ADA ADGRE2 BSG CCL4 DNAJB6 HAS1 MOG MYL12A NME2 PCDH11X RPSA</i>               |
| GO:0048870 | cell motility                                            | 11              | <i>ADGRE2 ATP5F1B BSG CCL4 CCR4 DNAJA1 HMGB1 IL1RN RPS19 SFTPD SLC3A2</i>         |
| GO:0006913 | nucleocytoplasmic transport                              | 9               | <i>CHP1 EIF4A3 HNRNPA1 PHB2 RAN RNPS1 RPL23 SNRPD1 SNRPE</i>                      |
| GO:0006457 | protein folding                                          | 9               | <i>B2M CCT5 CHORDC1 DNAJA1 DNAJB6 DNAJC19 FKBP1A FKBP4 HSPA8</i>                  |
| GO:0006790 | sulfur compound metabolic process                        | 9               | <i>AHCY DBI ESD FXN MPC2 SCD SLC19A3 SULT1A1 UGDH</i>                             |
| GO:0008283 | cell population proliferation                            | 9               | <i>BMP2 CKS2 CUL1 EIF2S2 GLUL PDXK RPL23A RPS27 SLC11A1</i>                       |
| GO:0051604 | protein maturation                                       | 7               | <i>APH1B CES1 FKBP1A FXN IMMP2L NDUFAB1 PARP1</i>                                 |

| GO term ID | GO term definition                    | Number of genes | Genes                                               |
|------------|---------------------------------------|-----------------|-----------------------------------------------------|
| GO:0006914 | autophagy                             | 7               | <i>FUNDC2/HMGB1/HSPA8/NRBF2/SQSTM1/TOMM40/VDAC1</i> |
| GO:0006520 | cellular amino acid metabolic process | 6               | <i>AHCY/GLUL/GOT2/ODC1/PTS/SLC25A21</i>             |
| GO:0003013 | circulatory system process            | 5               | <i>CES1/E2F4/HSD11B2/IMMP2L/P2RX2</i>               |
| GO:0007059 | chromosome segregation                | 5               | <i>BIRC5/MAD1L1/PHB2/RAN/SKA2</i>                   |
| GO:0007568 | aging                                 | 4               | <i>ADA/B2M/CACYBP/HMGAI</i>                         |
| GO:0006399 | tRNA metabolic process                | 4               | <i>DPH3/LSM6/PRORS1P/WDR4</i>                       |
| GO:0140014 | mitotic nuclear division              | 4               | <i>BIRC5/MAD1L1/RAN/UBE2C</i>                       |
| GO:0040007 | growth                                | 3               | <i>EIF4H/FMN1/LLPH</i>                              |
| GO:0034330 | cell junction organization            | 3               | <i>CAPZA1/MYADM/OCN</i>                             |
| GO:0021700 | developmental maturation              | 3               | <i>BMP2/DAZL/SYP</i>                                |
| GO:0030198 | extracellular matrix organization     | 3               | <i>BSG/DNAJB6/HAS1</i>                              |
| GO:0000902 | cell morphogenesis                    | 3               | <i>ABITRAM/BSG/LLPH</i>                             |
| GO:0007034 | vacuolar transport                    | 2               | <i>CCDC91/HSPA8</i>                                 |

| GO term ID | GO term definition                             | Number of genes | Genes        |
|------------|------------------------------------------------|-----------------|--------------|
| GO:0030705 | cytoskeleton-dependent intracellular transport | 1               | <i>HSPA8</i> |

**Table S6.** Pair-wise sequence similarity (%) between the seven Ninu MHC-I coding sequences.

| Seq     | Mala-UM | Mala-UD | Mala-UB | Mala-UE | Mala-UC | Mala-UA |
|---------|---------|---------|---------|---------|---------|---------|
| Mala-UM |         | 45.2    | 48.7    | 43.6    | 45.1    | 48.5    |
| Mala-UD | 61.8    |         | 63.9    | 76      | 98.3    | 63.3    |
| Mala-UB | 64      | 79.1    |         | 61      | 62.6    | 98.8    |
| Mala-UE | 60.1    | 85.5    | 75.3    |         | 76.8    | 60.7    |
| Mala-UC | 61.4    | 99      | 78.7    | 85.9    |         | 62.1    |
| Mala-UA | 63.8    | 78.9    | 99.3    | 75.1    | 78.4    |         |

\*Above diagonal: amino acid sequence identity; below diagonal: nucleotide sequence identity



## Supplementary Figures

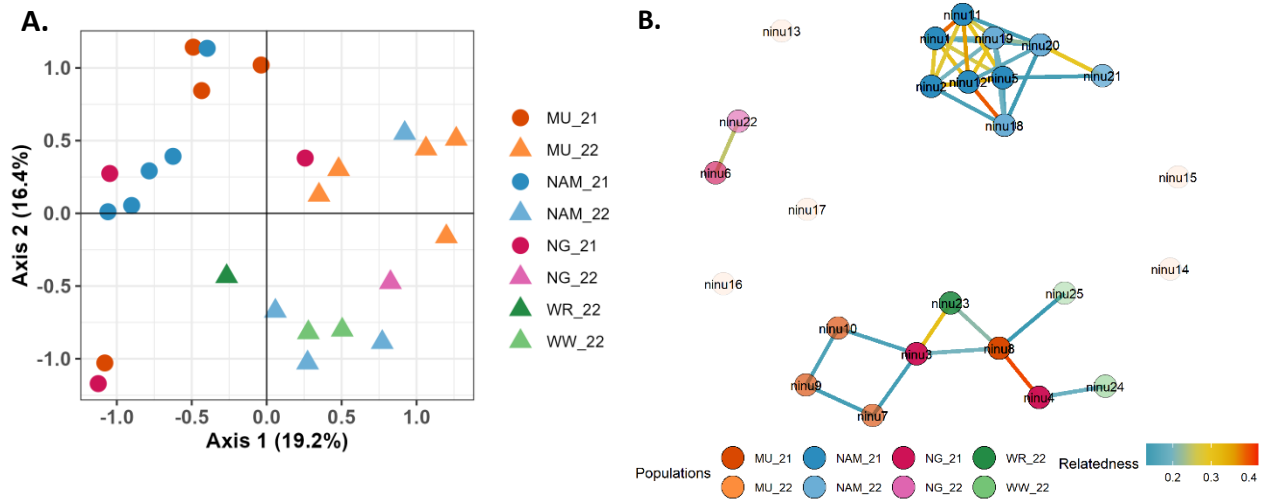

**Fig. S1.** (A) Principal Coordinates Analysis (PCoA) of all Ninu individuals detected at Kiwirrkurra (2021 – 2022) coloured by sub-population and year of first detection. Circles and triangles indicate Ninu identified in 2021 and 2022, respectively. Note that the MU sub-population is located northeast of the Kiwirrkurra community and remaining subpopulations (NAM, NG, WR and WW) are located south. (B) genetic relatedness matrix amongst all Ninu individuals. Nodes indicate individuals coloured by sub-population and year of first detection. Linkages indicate related individuals (half-sibs and above) coloured by relatedness value.

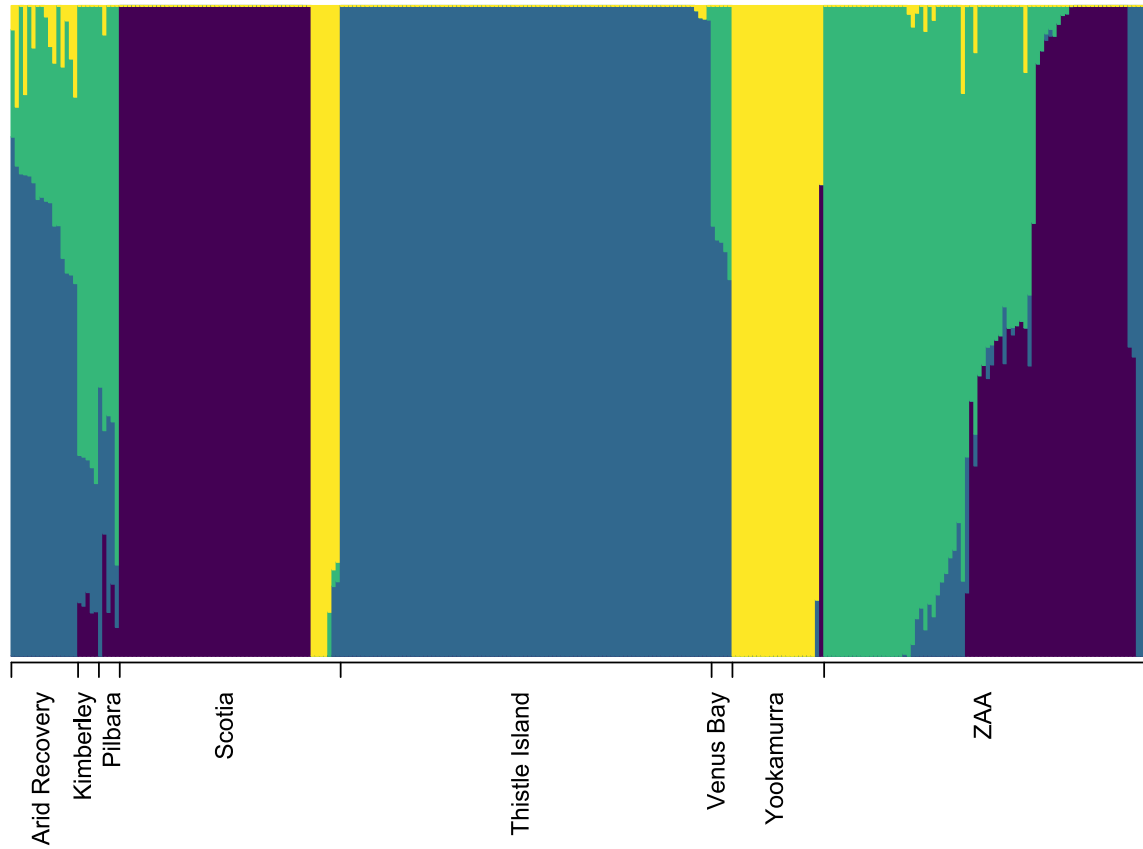

**Fig. S2.** *fastSTRUCTURE* analysis of the Group 1 source populations resulted in an optimum of  $k = 4$  clusters.

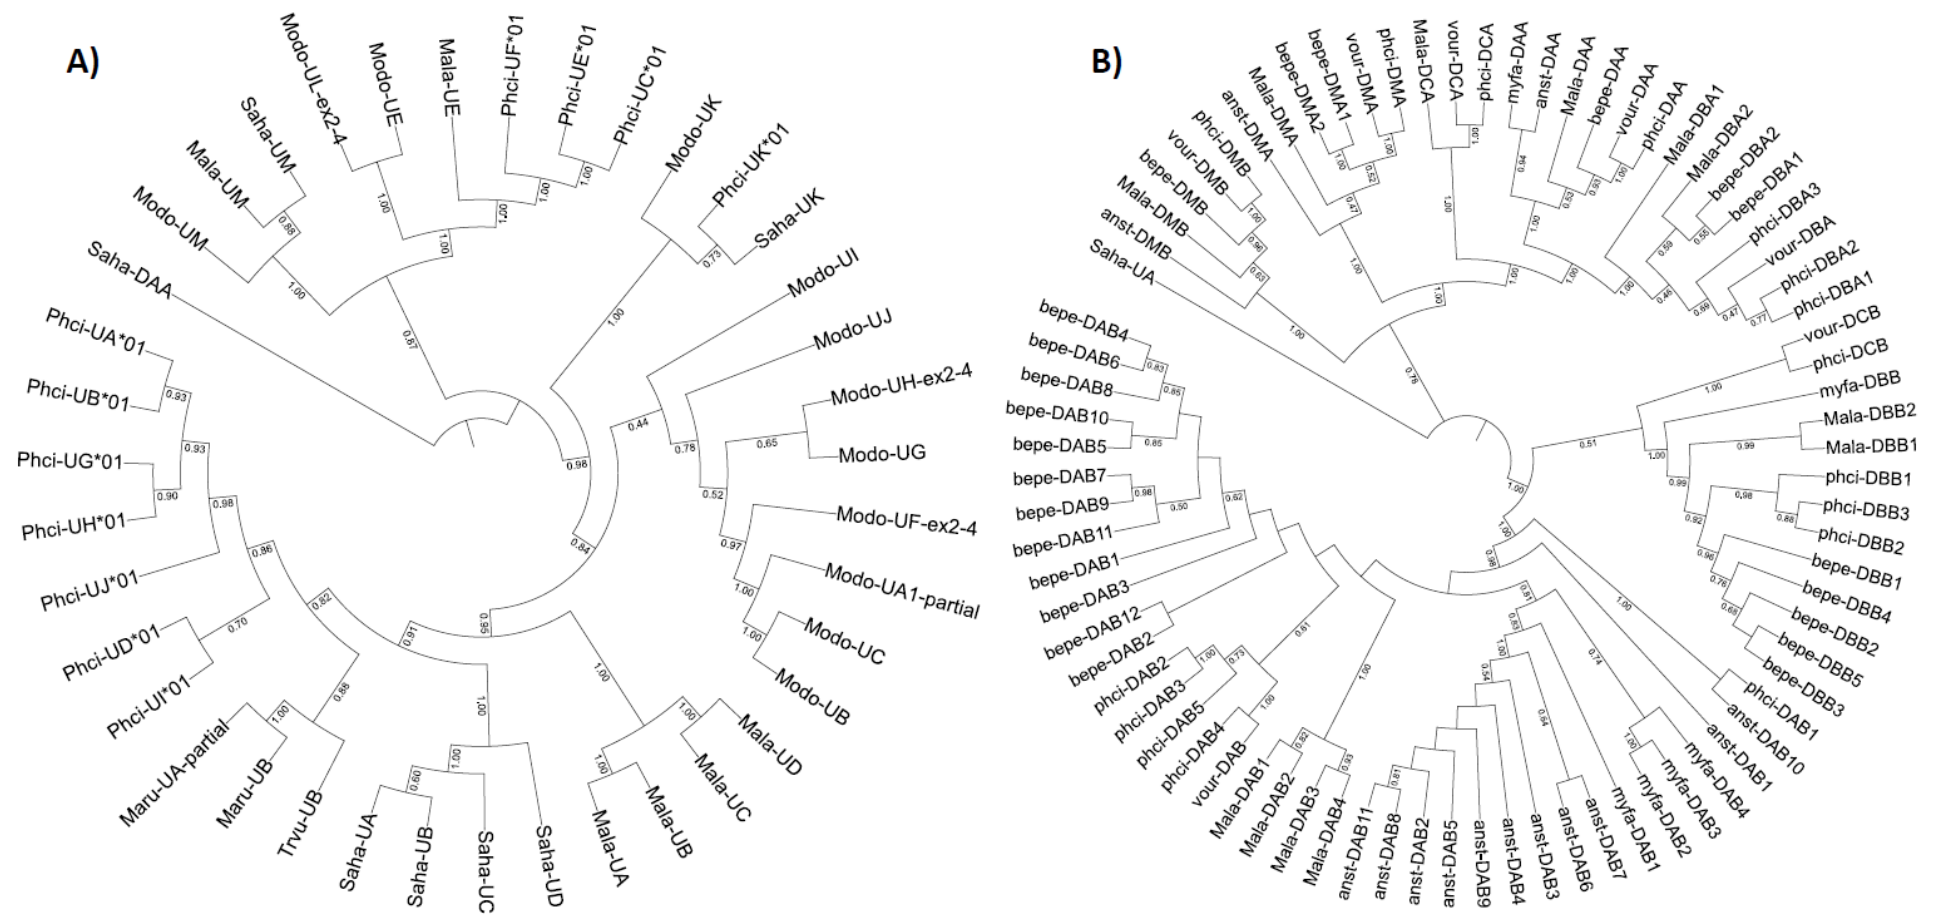

**Fig. S3:** Phylogenomic analysis of marsupial MHC class I and II genes. Genes were classified into (A) classical (DA, DB and DC) and non-classical (DM) MHC class II and (B) classical (-UA, -UB) and non-classical (-UC, -UE, -UF) MHC-I genes using coding sequences. Gene name prefix denotes species: *Anst* antechinus, *Bepe* Woylie, *Mala* Ninu, *Saha* Tasmanian devil, *Phci* koala, *Vour* wombat.

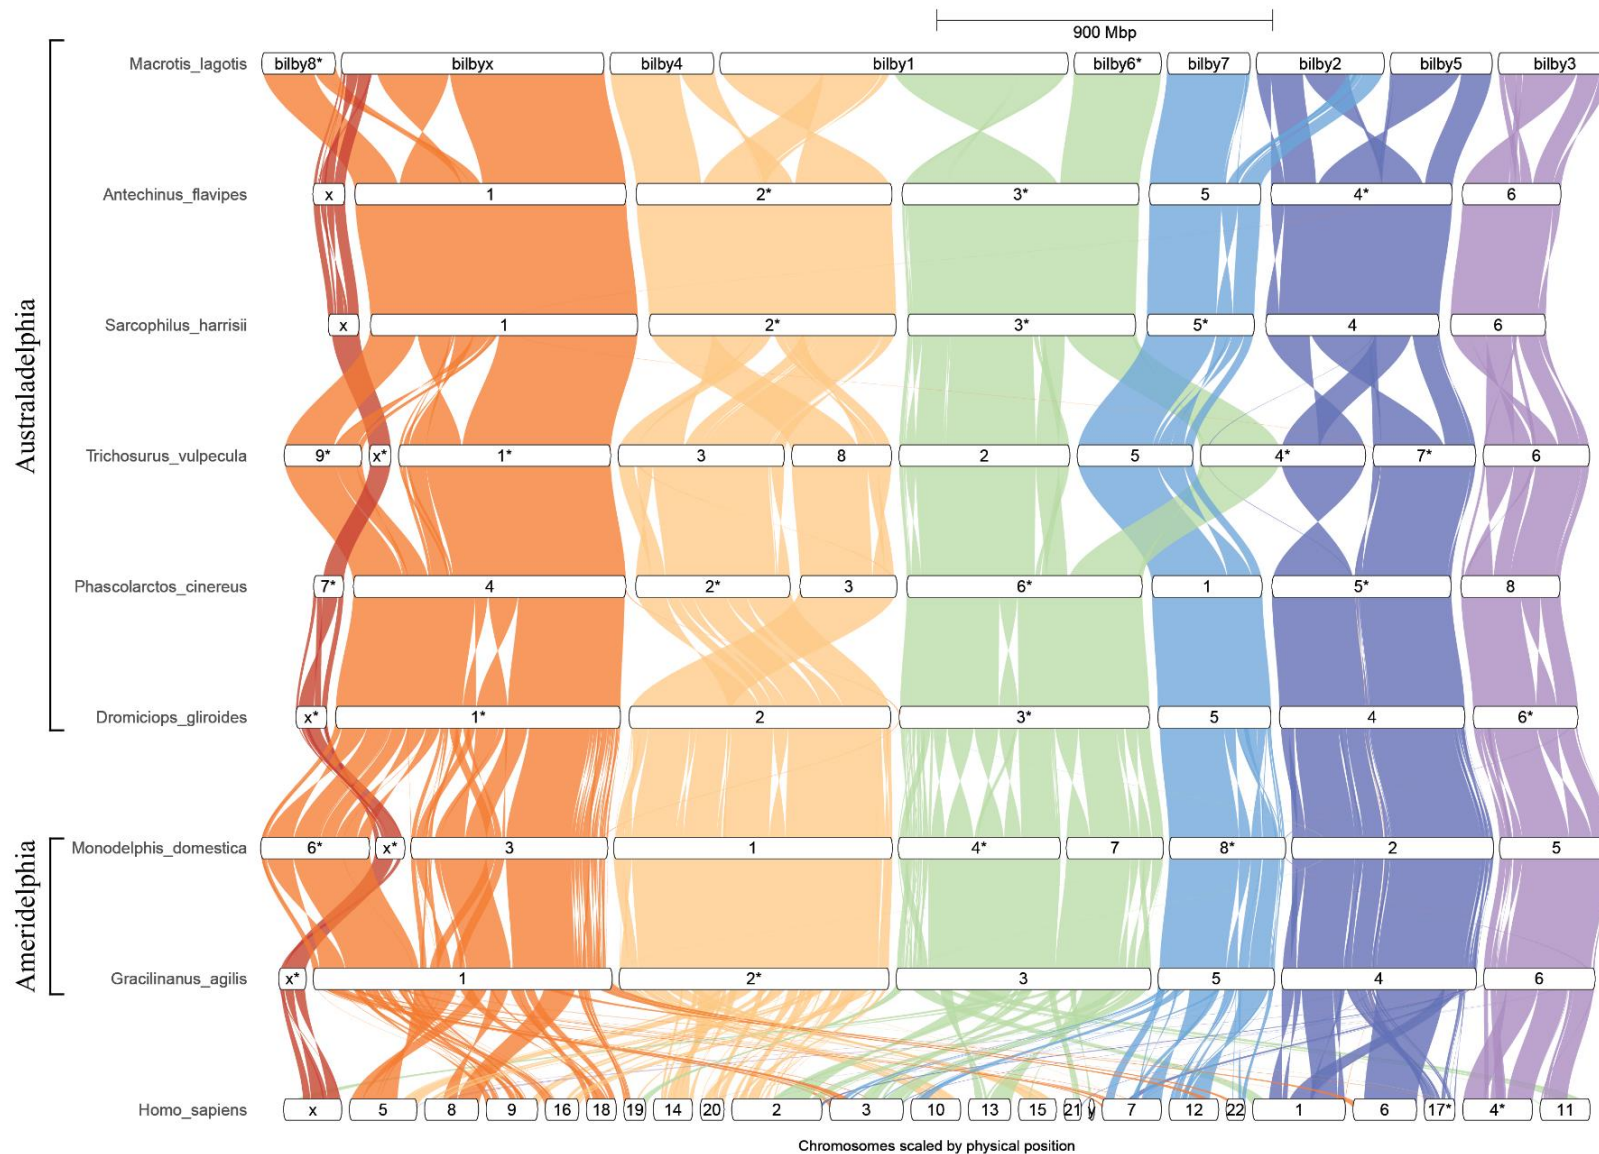

**Fig. S4.** Genespace synteny plots of the Australadelphia and Ameridelphia marsupials and *Homo sapiens*. Coloured blocks represent chromosome scaffolds for each species. Chromosomes are ordered to maximise visual synteny relative to neighbouring genomes, with the Ninu chromosomes defining the starting order and orientation. Each chromosome is labelled with the species and chromosome number (or X), with an “\*” suffix when reversed to minimise inversions.

## Supplementary Notes

### 1 Ninu Genome Sequencing, Assembly and Analysis

#### 1.1 Sample Collection and DNA extraction

Tissue samples (spleen, liver, lymph node, kidney, heart, tongue, ovary, uterus, pouch skin, mammary gland and salivary gland) were harvested from a female captive Ninu at Perth Zoo that was euthanised due to medical reasons in 2018. This individual was 7 years and 11 months of age at death. Tissue samples were collected during post-mortem examination and stored both with and without RNAlater (ThermoFisher, Catalogue AM7020) at -80°C for DNA and RNA extraction respectively. Testis tissue from a single male Ninu at Taronga Zoo that was euthanised for medical reasons in 2021, was flash frozen and stored at -80°C. This individual was 6 years and 7 months of age at death. Additionally, 500uL of peripheral blood from a single male Ninu housed at Dreamworld QLD was collected into RNAProtect animal blood tube (Qiagen, Catalogue 76544) during routine veterinary health checks and stored at -80°C. All samples were collected under opportunistic sampling permits from Perth Zoo and Taronga Zoo, and held under NSW Scientific Licence (SL101204) at the University of Sydney.

#### 1.2 Genome library preparation and sequencing

A high-quality reference genome was produced using a hybrid approach of 10x Genomics linked-read sequencing<sup>1</sup>, Pacific Biosciences (PacBio) HiFi sequencing<sup>2</sup> and Dovetail Omni-C™. For the 10x Genomics linked-read sequencing, sample quality control (QC) was assessed by Nanodrop 1000 Spectrophotometer (Thermo Fisher Scientific, USA), Qubit 2.0 Fluorimeter (Thermo Fisher Scientific, USA) and analysed on an 0.75% KBB agarose gel using the Pippin Pulse™, pulse field electrophoresis gel system (Sage Science) at the Ramaciotti Centre for Genomics (RCG; University of New South Wales, Australia). Library preparation was performed by RCG using the 10x Genomics v2 library preparation kit, prior to the 10x Genomics linked-read sequencing on a NovaSeq 6000 S1 flowcell (Illumina) using 150 bp PE reads and obtaining ~57× coverage. Long read sequencing was performed using PacBio HiFi Sequencing with sample QC assessed by confirming DNA fragment size was greater than 40kb with a Femtopulse (Agilent Technologies) and sample purity assessed by absorbance spectrophotometry with a Nanodrop 1000 (Thermo Fisher Scientific) at the Australian Genome Research Facility (AGRF; University of Queensland, Australia). AGRF performed the PacBio HiFi library preparation using the SMRTbell™ Express Template Prep Kit 2.0 (PacBio Catalogue 101-853-100). Sequencing was performed on the Pacific Biosciences Sequel II system across two SMRT Cells in circular consensus sequencing (CCS) mode obtaining ~10× coverage. For Dovetail Omni-C™, the RCG undertook the library preparation and sequencing; 20mg of flash-frozen spleen tissue was ground to a fine powder using a mortar and pestle in liquid nitrogen. This ground tissue was input into the Dovetail Genomics Omni-C™ proximity ligation assay (version 1.3), with a modified 1:10 dilution to the digestion enzyme. The proximity ligated DNA was split at the end of stage 3 into two 150ng aliquots and taken through the final library prep stages. The library size distribution and concentration were assessed using TapeStation™ (Agilent Technologies, California, USA) and Qubit™ (Thermo Fisher Scientific, Massachusetts, USA). The two libraries were pooled and sequenced on the NovaSeq 6000™ (Illumina, California, USA), SP 150bp PE format (RCG).

#### 1.3 Genome assembly

HiFi reads were generated using the CCS algorithm in SMRT Link v9.0.0.92188 and assembled using PacBio's Improved Phased Assembler (IPA) v1.1.2. Purge\_dups v1.2.3<sup>3</sup> was used to remove haplotigs and contig overlaps from both the primary and alternate assemblies (Fig. S5). An interleaved linked reads file was created from the raw 10x Genomics reads using

Long Ranger v2.2.2<sup>4</sup> and aligned to the draft assembly with Burrows–Wheeler Aligner (BWA) mem v0.7.17-r1188<sup>5</sup>. The output was sorted using samtools v1.9<sup>6</sup> and scaffolding was performed using ARCS v1.1.1<sup>7</sup> and LINKS v1.8.7<sup>8</sup> with the *-D* option to estimate gap sizes. PBjelly v15.8.24<sup>9</sup> was used for gap filling the scaffolded assembly with default parameters and Pilon v1.20<sup>10</sup> was used to polish the final assembly using the 10x reverse reads that were quality trimmed (trimming parameters: ftl=10 trimq=20 qtrim=rl) using BBDuk v37.98<sup>11</sup>. Vector contamination, low quality scaffolds and remaining false duplications were removed using Diploidocus “dipcycle”<sup>12</sup> with the HiFi reads used for depth analysis and the trimmed 10x PE reads used for kmer analysis. Scaffolds flagged as repeats were put aside and the core genome prepared for HiC scaffolding. First, GapSpanner v0.1.1<sup>13</sup> (<https://github.com/slimsuite/gapspanner>) was used to reassemble (Flye v2.8.2,<sup>14</sup>) and gap-fill core scaffolds using HiFi reads spanning assembly gaps. Gap-filled scaffolds were then subject to error correction with HyPo v1.0.3<sup>15</sup> (KMC v3.1.1,<sup>16</sup>). For this, HiFi long reads were mapped using minimap v2.17<sup>17</sup> and trimmed 10x short reads with (BWA) mem v0.7.17-r1188<sup>5</sup>, before running HyPo with 39X coverage and a 3.6 Gb genome size. Scaffolding based on OmniC data was carried out with HiRise [Version 2.1.6]<sup>18</sup>. The assembly was manually curated by iteratively generating and analysing the OmniC contact map. Contact maps were generated by aligning the OmniC data against the corresponding reference with bwa mem [v 0.7.17-r1188, options -5SP]<sup>19</sup>. Ligation junctions were identified and OmniC pairs generated using pairtools [v 0.3.0]<sup>20</sup>. Subsequently, we generated a multi-resolution OmniC matrix in binary form with cooler [v 0.8.10]<sup>21</sup> and balanced it with hicExplorer [v 3.6]<sup>22</sup>. We used HiGlass [v 2.1.11]<sup>23</sup> and PretextSuite to visualize the contact maps.

The two largest chromosome scaffolds were too big for some tools, so a version of the genome was also created with each of these scaffolds split into two sub-scaffolds. These splits were made at arbitrary assembly gaps approx. half-way along the chromosome. The repeat scaffolds previously isolated by Diploidocus were added back to the split assembly as additional “debris”, and subject to another round of gap-filling and cleanup. First, LR\_Gapcloser v20180904<sup>24</sup> was run using the HiFi reads, followed by another round of HyPo error-correction as described, above. Following error correction, all non-chromosome scaffolds were descaffolded into contigs to minimise the risk of misassemblies, and another round of Diploidocus “dipcycle” tidy was performed.

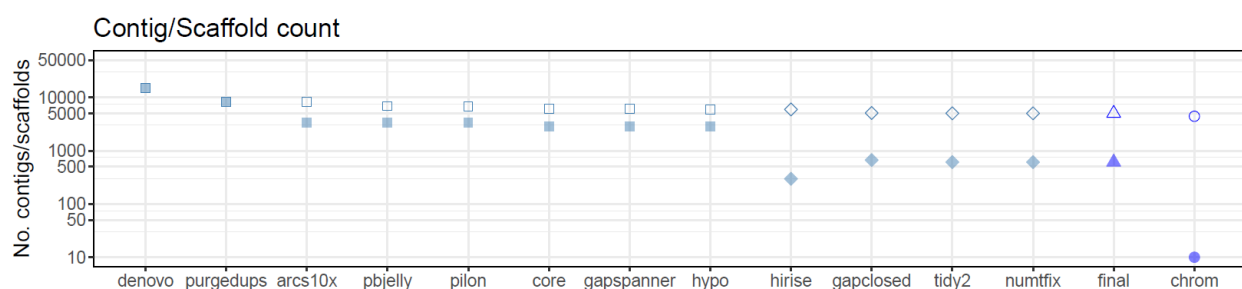

**Fig. S5:** The total number of scaffolds/contigs (filled symbols) and total number of contigs (outline symbols) per each assembly stage. See Supplementary Excel for full summary statistics on genome assembly versions.

## 1.4 Mitochondrial genome assembly

NUMTFinder v0.5.2<sup>25</sup> was run against the split HiC-scaffolded assembly using the published Ninu mitochondrial genome, NC\_006520.1. No mtDNA contig was identified, but a cluster of putative nuclear mitochondrial fragments (NUMTs) on SCAF\_002A was identified consisting of four NUMT fragments. An attempt to assemble the mtDNA was made by extracting mitochondrial reads from the raw HiFi data. GABLAM v2.30.5<sup>26</sup> was used to map NC\_006520.1 against the HiFi reads and extract reads that aligned across at least 95% of their length to the Ninu mtDNA. The 17 putative mitochondrial reads extracted were then assembled with Hifiasm v0.16.1<sup>27</sup>. Hifiasm failed to assemble any contigs, so the reads were assembled with Flye v2.9<sup>14</sup>, producing a 15,577 linear contig. This was longer than the 15,289 bp RefSeq genome but did not circularise. GABLAM analysis revealed that neither mtDNA sequence wholly contained the other, suggesting that both were partial sequences. The mtDNA Flye assembly was searched against the tidied assembly using NUMTFinder v0.5.2<sup>25</sup> to further characterise the SCAF\_002A NUMT region. This included a 15,573 bp NUMT fragment, flanked by simple sequence repeats. Read depth across the region was higher than expected and no mtDNA contig had been assembled, indicating that this was the misincorporation of the mtDNA into the nuclear assembly, as previously reported with long read assemblies<sup>25</sup>. Closer inspection of reads mapped to the NUMT region revealed a probable misassembly upstream of the NUMT, identified by clipping by the vast majority of reads within a few base pairs of the NUMT start and only a single HiFi read supporting the assembly. The remainder of the NUMT regions consisted of NUMT fragments, simple repeats, and assembly gaps with higher or lower than expected sequencing depth. The contig beyond the downstream assembly gap had normal (mean 10.5X) HiFi coverage. HiFi reads mapping to the full NUMT region from the upstream misassembly to the downstream assembly gap (position 61137977-61167704) were extracted with samtools v1.15<sup>6</sup> and reassembled using Hifiasm v0.16.1<sup>27</sup>. A 28,422 bp contig was selected, corresponding to 17,367 bp mtDNA sequence with the first 10,929 bp imperfectly repeated. This included the two simple repeats from the NUMT region (AATACTAT)n and (TAAATTATTA)n. The contig was reverse-complemented to match the RefSeq mtDNA orientation and HiFi reads mapped with minimap v2.22. Average coverage was 65.4X, and so the HiFi mapping was used for both long reads and high-accuracy reads for HyPo v1.0.3 correction. GABLAM v2.30.5 was used to identify overlapping ends and circularise the genome at a position corresponding to the first base of the RefSeq mtDNA. The mitochondrial scaffold, BILBYCHRMT, was annotated using the MitoHiFi pipeline v2 with MitoFinder<sup>28,29</sup> and visualised with MitoZ v2.3<sup>30</sup>.

## 1.5 Manual curation of nuclear genome assembly

Following mtDNA assembly, the NUMT cluster was removed from SCAF\_002. Analysis with NUMTFinder v0.5.2 and the assembled mtDNA genome, identified that mtDNA contigs had been misassembled into this scaffold. The 32,110 bp region from the misassembly point to the downstream assembly gap (positions 61137977 to 61170086) was manually excised. Finally, the two split chromosome scaffolds were rejoined into single scaffolds and the main chromosome scaffolds renamed, producing the final assembly (v1.9).

## 1.6 Assembly quality assessment

At each step of the assembly process, genome quality was assessed using BUSCO v3.0.2b (mammalia\_odb9; n=4104) or BUSCO v5.0.0/v5.2.2/v5.3.0/v5.4.4 (mammalia\_odb10; n=9226)<sup>31</sup> BUSCOMP v0.13.0<sup>32</sup>, DepthKopy v1.1.0<sup>12</sup> and Merqury v20200313<sup>33</sup> using the trimmed 10x PE reads. BUSCOMP and BBTools v38.73 (RRID:SCR\_016968)<sup>11</sup> were used to generate additional assembly statistics. The final 3.656 Gb assembly is comprised of 5,028 contigs (N50 = 1.22 Mb) in 609 scaffolds (N50 = 343.9 Mb), including 9 nuclear chromosomes and a complete mitogenome (Extended Data Table 3). The assembly showed high

completeness with 0.34% gaps, 92.2% Merqury kmer completeness and 93.5% complete mammalian BUSCOs (Extended Data Table 3) (5.1% missing). The BUSCO duplication rate remains quite high at 4.9%, possibly as a consequence of the low HiFi sequencing depth reducing the power of depth-based removal of false duplications. However, the DepthKopy copy number profile of Duplicated BUSCO genes is quite similar to single-copy BUSCO genes (Fig. S6), with a mean copy number of 1.13, suggesting that the majority of the Duplicated BUSCO genes are genuine gene duplications rather than false duplications. 95.6% of the assembly (3.495 Mb) has been assigned to chromosomes, including 8,623 of the 8,625 complete BUSCO genes. Overall sequence accuracy is good, with a Merqury QV score of 40.42 (less than one error per 10 kb across the genome).

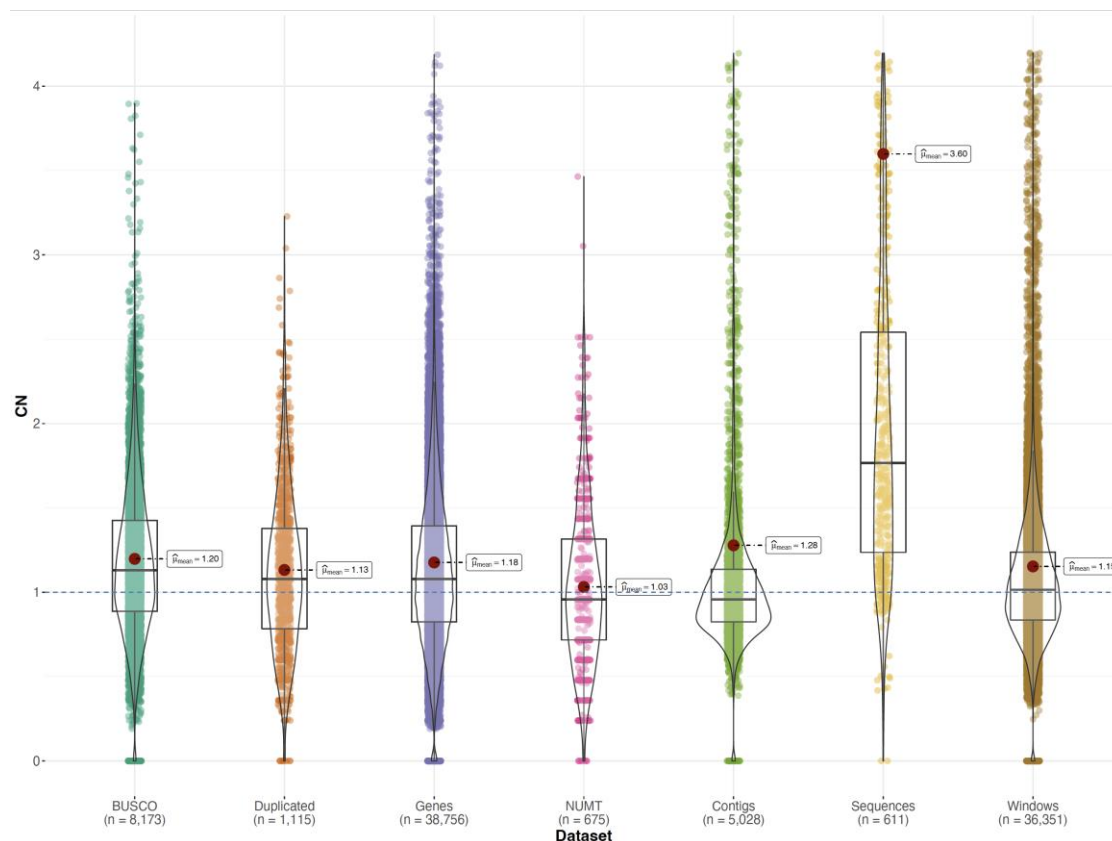

**Fig. S6.** DepthKopy predicted copy number distribution. Mapped Hi-Fi read depths have been converted into copy number distributions using the modal single-copy read depth from “Complete” BUSCO genes of 8.31X. Plots were generated with ggstatsplot<sup>34</sup> with box plots marking the median and quartiles. Whiskers extend to the most extreme values no further than 1.5 times the inter-quartile range. BUSCO: single-copy complete BUSCO genes; Duplicated: duplicated complete BUSCO genes; Genes: GeMoMa gene models; NUMT: Predicted NUMT fragments; Contigs: individual contigs; Sequences: individual scaffolds (two longest chromosomes split); Windows: 100 kb tiled windows.

### 1.7 Resequenced genomes

**Ninu.** Twelve Ninu genomes were resequenced, six individuals (3 males, 3 females; Table S1) were classified as coming from a temperate ancestry (35°S 136°E; island population off the coast of South Australia), and six individuals (3 males, 3 females) were classified as coming from a semi-arid ancestry (26°S 146°E; captive free-range population in south-central Queensland). DNA was extracted from ear biopsy samples that had been stored in 70% ethanol using MagAttract HMW DNA Kit (Qiagen, Catalogue 67563). Sample QC including flurometric assays with Quant-iT (Thermo Fisher Scientific), Qubit (Thermo Fisher Scientific) and Picogreen (Thermo Fisher Scientific) as well as spectrophotometric analysis with a



Nanodrop (Thermo Fisher Scientific), a TruSeq DNA PCR free library prep (Illumina, San Diego, CA, USA) and WGR was undertaken by the RCG. Samples were sequenced as 150 bp PE reads across a single S2 flowcell on the Illumina NovaSeq 6000 obtaining ~30× coverage per sample.

**Yallara.** Five Yallara collected between 1895-1931 were sampled (Table S1). All five samples were extracted with a modified protocol from Fulton, Wagner [35] and the DNeasy Blood and Tissue kit (Qiagen Catalogue 69504). DNA extraction was done in a Trace DNA laboratory, taking appropriate precautions to reduce the risk of contamination. One sample (NMVC7091) failed QC and so the remaining four had ThruPLEX DNA (Takara Bio, San Jose, CA) library prep and were sequenced on an Illumina NovaSeq 6000 S1 as 2 x 150 bp paired end reads. Due to low coverage in many of the Yallara samples (Table S1), the two best coverage samples (NHMU1883.10.19.17 and NMVC7087) underwent a Meyer Kircher library prep<sup>36</sup> without sonication due to degraded DNA and Illumina adapter ligation with a dual 8bp index to obtain higher coverage (Table S1).

#### *WGR alignment and variant calling*

Resequencing data from the 12 Ninu and 4 Yallara genomes were aligned to version 1.5 (see Supplementary Excel) of the reference genome and variants were called using the DRAGEN Germline platform v3.8.4 (Illumina)<sup>37</sup>. Joint genotyping across all Ninu samples was also performed with DRAGEN Joint Genotyping v3.8.4. Bcftools v1.11<sup>38,39</sup> was used to split multi-allelic variant calls and to left-normalise the variants prior to variant annotation with ANNOVAR v20180416<sup>40</sup>. Genotyping rates were calculated using PLINK v1.90<sup>41</sup>. MultiQC reports for the WGR alignment and variant calling revealed that an average of 1% of reads for the Ninu genomes were unmapped, and 7% were duplicated. Coverage depth ranged from 13.8x to 29.6x (mean = 23.9x, SD = 3.99; Table S1). Joint genotyping of the 12 Ninu WGR samples resulted in 50,177,808 variants with an average genotyping rate of 93.4% (Table S1). Variant annotation identified 114,741 (0.23%) nonsynonymous SNPs across 19,376 genes. Further alignment and variant calling metrics are available in Table S1. The first sequencing run of Yallara genomes had an average of 23% of reads were unmapped and 58% of reads duplicated, with coverage ranging from 0.4x to 7.9x (mean = 2.75x, SD = 3.53; Table S1).

Using SeqPrep2 (<https://github.com/jeizenga/SeqPrep2>), raw reads from the four Yallara individuals (8 lanes of data in total) were trimmed of their adapters, filtered if they were shorter than 30 bp, and remaining paired-end reads were merged with a minimum overlap of 15 bp (and quality score cutoff for mismatches to be counted in the overlap of 15). The bwa aln algorithm from the Burrows-Wheeler Aligner (BWA) v.0.7.17-r1188<sup>5</sup> was then used to map merged and unmerged reads from the Yallara samples to version 1.9 of the Ninu reference genome. Six male Ninu samples (see Table S1) were also mapped to the Ninu reference genome (v1.9) using bwa aln with default parameters. Resulting BAM files from the same sample but separate runs were merged into one file using samtools merge, and average depth was calculated for each sample using a custom script. BAM files for each sample were separated by chromosome, and HaplotypeCaller from GATK4 v. 4.1.8.1<sup>42</sup> was used to call variants separately. The resulting variant files were filtered individually to remove variants less than a third of the average depth, and more than 3 times the average depth of coverage for that sample. GenomicsDBImport from GATK4 v.4.1.8.1 was used to create a GenomicsDB datastore for each chromosome, before GenotypeGVCFs was used to joint genotype each chromosome separately. Variants were removed in each sample individually if they had less than 1/3 or over 3 times the average depth of coverage for that sample. The samples were merged into a single variant file (containing 1,544,266,668 variants), which was filtered to remove any indels, any sites with map quality of less than 20, all transitions (to account for any DNA damage from the

historic Yallara samples), and any variants called in less than 90% of samples, leaving 511,723 variants remaining.

Given two of the Yallara samples had low mean coverage (see Table S1), two separate PCA analyses were performed. The first PCA was performed on the high coverage samples only which included the two high coverage Yallara samples (9.28× and 12.82× mean coverage) and all six Ninu samples (all over 10× mean coverage). The second PCA was performed on the full dataset which included all Yallara and Ninu samples but with the two low coverage Yallara samples (0.73× and 0.99× mean coverage) projected. Analyses were performed in plink2 v.2.00a2.3LM following linkage pruning and removal of any variants with a minor allele frequency below 0.005 or above 0.99 (leaving 2787 variants) and confirmed the Yallara and Ninu are two separate species. In both PCAs, PC1 splits the Yallara and Ninu explaining 61.6% of the variance in the high coverage dataset and 74.4% in the full dataset with low coverage samples projected (Fig. 1D; Fig. S7). In both analyses PC2 splits the Ninu samples into semi-arid and temperate samples, explaining a further 11% of the variance for the high coverage dataset and 6.92% for the full dataset.

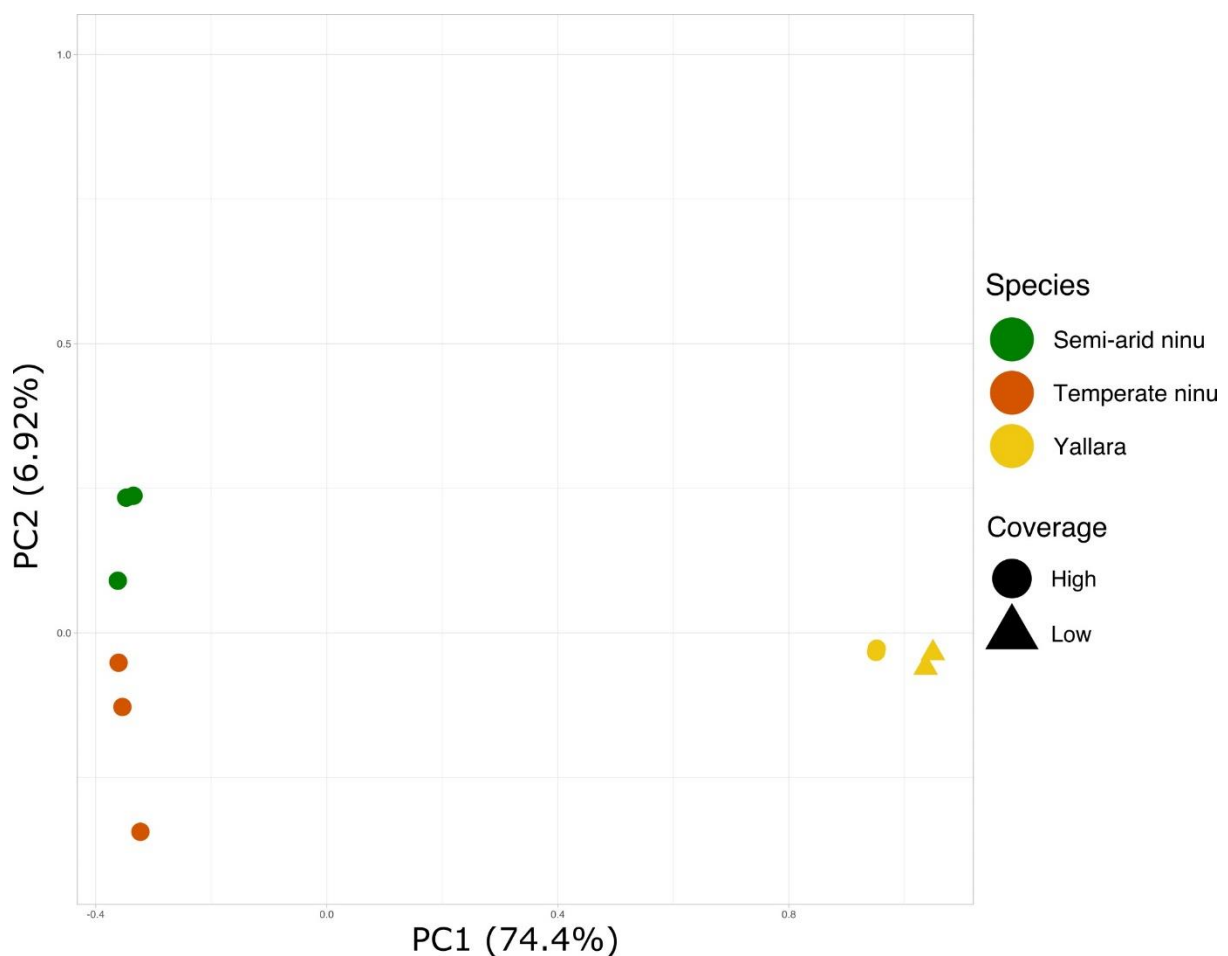

**Fig S7.** PCA where the low coverage Yallara are projected on to the high coverage individuals.

To confirm the phylogenetic relationships between the Ninu and Yallara, all reads mapping to the mitogenome were extracted from the final BAM files of the high coverage individuals, and a consensus sequence was generated for each sample using a minimum depth of coverage of 3. An alignment was made including all Ninu and Yallara samples, Ninu reference mitogenome (v1.9), and the northern brown bandicoot (*Isoodon macrourus* - NCBI Accession #NC\_002746.1) that was used as an outgroup. Maximum Likelihood (ML) phylogenetic analyses were conducted in RAxML v.8.2.12<sup>43</sup>, using the GTR+I+G nucleotide substitution model as selected by the Akaike information criteria (AIC) in JModelTest v.2.1.6

(<https://github.com/ddarriba/jmodeltest2>). Three different ML trees are firstly generated, before branch supports were evaluated on the best scoring tree based on 500 bootstraps of the data. Bayesian analyses were conducted in MrBayes v.3.2.6<sup>44</sup> based on 10 million generations of the data, sampling every 1000 and with the first 10,000 discarded as burn-in. Branch support values from the ML analyses are given in black on major branches as bootstrap support values (as a percentage), while Bayesian posterior probabilities are given in blue (see Fig. 1).

### *Yallara Reference Genome*

We used data from the Yallara with the highest sequencing coverage (NMVC7087) to generate a reference genome. We used the bwa aln algorithm<sup>5</sup> as described above to align reads to the Ninu genome (version 1.9) before obtaining a consensus sequence by using the mpileup function of samtools v.0.1.9 with parameters -I, -B and -u, piping the output to bcftools view v.0.1.19 and finally using the vcf2fq function in vcfutils<sup>6,45</sup>. Following this we used the raw reads to polish the genome assembly using pilon v.1.24<sup>10</sup>, we obtained the assembly metrics using stats.sh script within bbmap v.37.98<sup>46</sup>. We then checked the completeness of the Yallara assembly by running BUSCO v.5.4.6 with the vertebrata lineage<sup>31</sup>.

### **1.8 Genome-wide association study**

A genome-wide association analysis (GWAS) was performed on the 12 Ninu resequenced genomes to identify allele frequency differences between the six semi-arid and six temperate samples. The reference genome was indexed with Picard v.2.21.9<sup>47</sup> and SAMtools v.1.6<sup>6,38</sup>. The joint-genotyping VCF containing genotype calls for all 12 Ninu was filtered using GATK v.4.2.0.0<sup>48</sup> and VCFtools v.0.1.14<sup>49</sup> to retain only bi-allelic SNPs, with no missing data and a minor allele frequency > 0.05. To mitigate for the small sample size GWAS, we performed three association tests and only retained SNPs that were significant across all three tests, as per Batley *et al.*<sup>50</sup>. Association tests were performed in PLINK v.1.90<sup>41</sup> with either the Chi-square test or Fisher's exact test with a significance level  $\alpha = 0.0001$ . Weir and Cockerham's  $F_{ST}$  outlier test was performed in VCFtools, and SNPs that were > 5 SD away from the mean were retained as candidate SNPs. BEDtools v.2.29.2<sup>51</sup> was used to identify genes containing candidate SNPs using the annotated genome. Unique genes were identified and run through GONet<sup>52</sup> to obtain a network of biological processes with GO term annotation using generic GO slim. GO terms were summarised and visualised with Revigo<sup>53</sup>.

Joint genotyping of the 12 Ninu WGR samples resulted in 50,177,808 variants with an average genotyping rate of 93.4%. Variant annotation identified 114,741 (0.23%) nonsynonymous SNPs across 19,376 genes. After filtering we retained a total of 22,299,136 biallelic SNPs for use in our association tests. The Chi-square association test returned 63,868 SNPs, the Fisher's test returned 52,003 SNPs and the  $F_{ST}$  outlier test returned 3,858 SNPs. A total of 3,858 SNPs that met our criteria were common across all three association analyses. We identified 339 unique genes. The full list of GO terms and associated genes are provided in Table S4. A summary of GO terms, ranked by their uniqueness is shown in Extended Data Fig. 2.

## 2 Bilby population genomics

### 2.1 Historical population size

The mean sequencing coverage for all 296 scaffolds of was estimated for each Ninu and Yallara (first run) resequenced genomes using Mosdepth v0.2.9<sup>54</sup> with `-n --fast-mode`. We compared the average depth of each scaffold between resequenced Ninu males and females to identify scaffolds putatively belonging to the X chromosome. X chromosome scaffolds are expected to have approximately 50% lower coverage in males than in females when mapping to a female reference genome, as females possess two X chromosomes and males possess one. To ensure sex chromosomes were not included in downstream analyses, we considered scaffolds as belonging to the X chromosome when the average sequencing coverage was 75% lower in males compared to females (Table S7).

**Table S7.** Scaffolds putatively belonging to the X chromosome (v1.5) determined by the average male scaffold depth being 75% less than the average female scaffold.

| Scaffold | Average Depth (Male) /<br>Average Depth (Female) |
|----------|--------------------------------------------------|
| SCAF_284 | 0.58                                             |
| SCAF_180 | 0.66                                             |
| SCAF_276 | 0.68                                             |
| SCAF_283 | 0.70                                             |
| SCAF_139 | 0.72                                             |
| SCAF_265 | 0.73                                             |
| SCAF_273 | 0.74                                             |
| SCAF_255 | 0.74                                             |

Due to the low coverage of the Yallara genomes, we only inferred the historical effective population size of Ninu ( $n = 12$ ) and Yallara ( $n = 2$ ) using MSMC and PSMC' models in MSMC2<sup>55</sup>. Input files were prepared according to the authors' guidelines (<https://github.com/stschiff/msmc/blob/master/guide.md>) for 14 unphased, diploid genomes. Variant and mask files were generated for each scaffold, per individual, using bcftools v.1.8<sup>39</sup>, msmc-tools (<https://github.com/stschiff/msmc-tools>), and the mean scaffold coverage estimated with Mosdepth.

Five separate analyses were conducted to observe differences across bilby species and populations. These include the combined MSMC analyses for (1) Ninu, (2) Yallara, and subsets of Ninu sampled from (3) temperate and (4) semi-arid regions (Table S8). Additionally, (5) PSMC' analyses were performed on all 14 individual bilbies. Due to the computational limitations of MSMC, four individuals (eight haplotypes) with the highest mean sequencing coverage were selected for all three Ninu MSMC analyses (Table S8). Two Yallara individuals (four haplotypes) were used as they had sufficient sequencing coverage. Twenty bootstrap replicates were run for each of the two species-level MSMC analyses to provide confidence intervals around the combined estimate.

All demographic analyses used a time interval of  $-p \ 1*3+10*1+1*3$  to prevent overfitting of most recent and ancestral estimations. Additionally, the composite likelihood approach was used to run on all pairs of haplotypes, but not across them (-I), as the genomes were unphased<sup>55</sup>. We scaled the demographic plots using the estimated mutation rate of the Tasmanian devil ( $1.17 \times 10^{-9}$  mutations per site per generation)<sup>45</sup> given the lack of an estimated rate for *Macrotis* spp. We assumed a generation time of two years, based on an average of reported generation times for captive and wild populations of Ninu<sup>56-59</sup>. A parameter sweep was conducted using different mammalian mutation rates and Ninu generation times to evaluate the impact of scaling on demographic estimations.

**Table S8.** The four individuals with the highest mean sequencing coverage selected for combined MSMC analyses.

| Combined MSMC analyses | Individuals used                               |
|------------------------|------------------------------------------------|
| All Ninu               | 0007B116F9, 7C7B6DB, 0007C7AFE8, 10002530249   |
| Semi-arid Ninu         | 0007B11508, 0007B116F9, 10002530249, 2530351   |
| Temperate Ninu         | 0007C7AFE8, 0007C7B153, 0007C7B720, 0007C7C1A6 |
| Yallara                | BMNH1883101917, NMVC7087                       |

Scaling the MSMC plots with the thylacine mutation rate ( $1.88 \times 10^{-9}$  mutations per site per generation) estimated the most recent population expansion to have occurred after the onset of the last glacial period (Fig. S8), whereas the same expansion occurred prior to the last glacial period when scaled with the Tasmanian devil mutation rate ( $1.17 \times 10^{-9}$  mutations per site per generation; Fig. S6). A direct estimate of the per-generation mutation rate of Ninu would improve the accuracy of demographic inference.

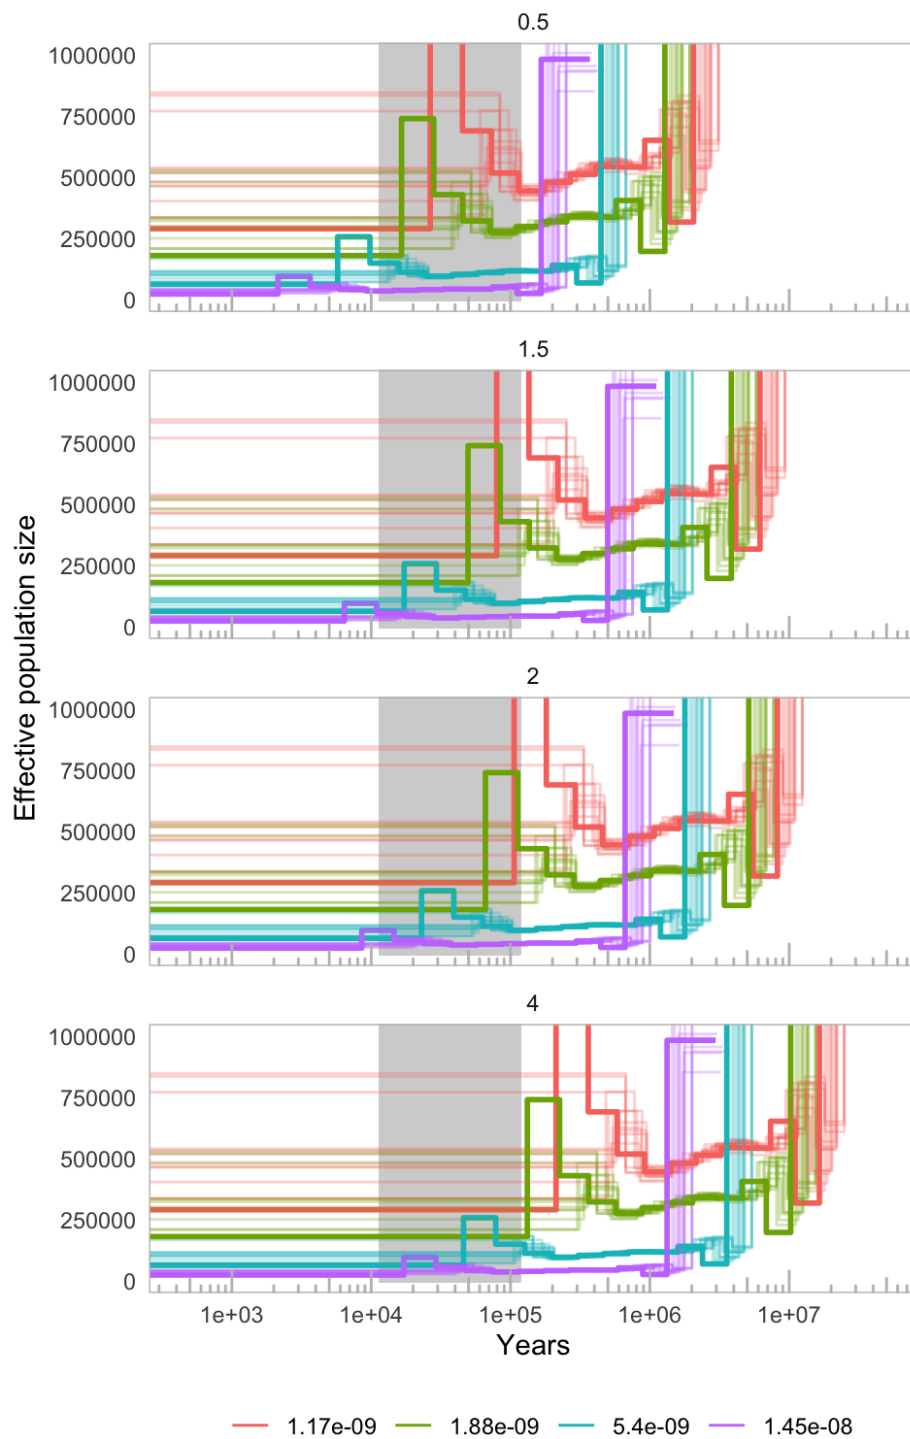

**Fig. S8.** MSMC of Ninu over mutation rates (coloured lines) and generation times (panels). Bold lines indicate a combined analysis of four Ninu with the highest mean sequencing coverage. Thin lines indicate individual Ninu. Mutation rates are the estimated mutations per site per generation for humans ( $1.45 \times 10^{-8}$ )<sup>60</sup>, mice ( $5.4 \times 10^{-9}$ )<sup>61</sup>, Tasmanian devil ( $1.17 \times 10^{-9}$ )<sup>45</sup>, and thylacine ( $1.88 \times 10^{-9}$ )<sup>45</sup>.

## 2.2 Runs of Homozygosity (ROH) analysis

To investigate levels of inbreeding in the 12 resequenced Ninu we characterized runs of homozygosity (ROH) using PLINK v.1.9<sup>41</sup>. Putatively sex-linked scaffolds were removed as

the male heterosomes will affect ROH results. Further, as missing data can have large effects on ROH analyses<sup>62</sup>, all missing data were removed from the SNP dataset. After filtering, 29,266,950 SNP remained for the ROH analysis. We ran PLINK using a sliding window size set to 50 SNPs (i.e. *homozyg-window-snp*). Homozygous regions were considered a ROH if they comprised at least 100 kb (i.e. *homozyg-kb*) and comprise at least 100 SNPs (i.e. *homozyg-snp*). To account for genotyping errors, one heterozygous SNP was allowed per window (i.e. *homozyg-window-het*), and five per ROH (i.e. *homozyg-het*; though this is already limited with the previous parameter). To ensure variable SNP coverage across the genome did not bias the detection of ROH, a minimum of one SNP per 50 kb was required to call a ROH (i.e. *homozyg-density*), and the maximum gap allowed between two SNPs (to be considered adjacent) was 200 kb (i.e. *homozyg-gap*). At least 5% of windows were required to contain a given homozygous SNP for it to be considered within a ROH (i.e. *homozyg-window-threshold*).

To check the robustness of our results, we increased the sliding window size and the number of heterozygous SNPs allowed per window to 100 and 2 respectively in separate analyses (i.e. 4 parameter combinations altogether; Table S9). Altering many of the other PLINK parameters (e.g. SNP density; *homozyg-density*) are unlikely to affect the results due to our high SNP-density<sup>62</sup>.

ROH were characterized into size classes, whereby longer ROH putatively represent relatively recent instances of inbreeding, while smaller ROH putatively represent inbreeding in the distant past, reflective of the demographic history of the individuals examined<sup>63</sup>. ROH-based inbreeding coefficients ( $F_{ROH}$ ) were calculated based on the proportion of the genome present in ROH. As not all of the genome is considered in the ROH analysis (e.g. scaffolds shorter than the minimum ROH length are not considered), we calculated the maximal ROH length that the analysis is able to discover (i.e. the genome coverage) using a simulated individual with a completely homozygous genotype following Meyermans, Gorssen [64].  $F_{ROH}$  was calculated for all ROH > 100 kb ( $F_{ROH>100kb}$ ), 500 kb ( $F_{ROH>500kb}$ ), and 1 Mb ( $F_{ROH>1Mb}$ ) to assist comparisons of inbreeding coefficients across studies. Observed heterozygosity was calculated for each individual based on the same SNP dataset using VCFtools.

The six Ninu from the temperate population had lower heterozygosity and generally higher  $F_{ROH}$  than those from the semi-arid population (Table S2; Fig. 2C). Three temperate individuals had the highest  $F_{ROH}$  (except for  $F_{ROH>1Mb}$ ) and the lowest heterozygosity. Results were similar when altering the parameters to identify ROH. These results are likely a consequence of the population's relatively small founder size and limited gene flow with other populations (see 2.3 Managed population history). Twenty bilbies were first introduced to the temperate site (Thistle Island) in 1997, with subsequent introductions of 20 bilbies in 1998 and 2000. Since 2000, there has been no gene flow to the island for 35-40 generations.

$F_{ROH}$  values in bilbies from the semi-arid population were relatively diverse, with generally fewer short ROH (e.g. <0.8 Mb) than most temperate individuals (Table S2; Fig. 2C). However, three individuals from the semi-arid population had similar numbers of short ROH to some individuals from the temperate one, as well as numerous long ROH (Fig. S9).

**Table S9.** ROH values using different PLINK parameter combinations. Changes to the PLINK parameters are specified in the header. FROH values were colour-coded from highest (red) to lowest (blue).

| Bilby ID       | Source pop | <i>homozyg-window-het = 2</i> |                            |                            | <i>homozyg-window-snp = 100</i> |          |                            | <i>homozyg-window-het = 2<br/>homozyg-window-snp = 100</i> |                          |          |                            |                            |                          |
|----------------|------------|-------------------------------|----------------------------|----------------------------|---------------------------------|----------|----------------------------|------------------------------------------------------------|--------------------------|----------|----------------------------|----------------------------|--------------------------|
|                |            | # of ROH                      | $F_{ROH > 100 \text{ kb}}$ | $F_{ROH > 500 \text{ kb}}$ | $F_{ROH > 1 \text{ Mb}}$        | # of ROH | $F_{ROH > 100 \text{ kb}}$ | $F_{ROH > 500 \text{ kb}}$                                 | $F_{ROH > 1 \text{ Mb}}$ | # of ROH | $F_{ROH > 100 \text{ kb}}$ | $F_{ROH > 500 \text{ kb}}$ | $F_{ROH > 1 \text{ Mb}}$ |
| 000786C0A7     | Semi-arid  | 54                            | 0.0019                     | 0                          | 0                               | 37       | 0.0013                     | 0                                                          | 0                        | 50       | 0.0018                     | 0                          | 0                        |
| 0007B11508     | Semi-arid  | 1847                          | 0.1130                     | 0.0130                     | 0.0007                          | 1753     | 0.1046                     | 0.0113                                                     | 0.0007                   | 1843     | 0.1123                     | 0.0127                     | 0.0007                   |
| 0007B116F9     | Semi-arid  | 1722                          | 0.1144                     | 0.0210                     | 0.0034                          | 1682     | 0.1075                     | 0.0180                                                     | 0.0027                   | 1705     | 0.1136                     | 0.0214                     | 0.0031                   |
| 0007DE091B     | Semi-arid  | 63                            | 0.0022                     | 0                          | 0                               | 37       | 0.0014                     | 0                                                          | 0                        | 58       | 0.0021                     | 0                          | 0                        |
| 10002530249    | Semi-arid  | 351                           | 0.0167                     | 0.0005                     | 0                               | 293      | 0.0138                     | 0.0005                                                     | 0                        | 340      | 0.0163                     | 0.0005                     | 0                        |
| 2530351        | Semi-arid  | 1609                          | 0.0967                     | 0.0109                     | 0                               | 1527     | 0.0908                     | 0.0113                                                     | 0                        | 1591     | 0.0960                     | 0.0120                     | 0                        |
| 0007C7AFE8     | Temperate  | 2888                          | 0.1910                     | 0.0338                     | 0.0028                          | 2825     | 0.1804                     | 0.0286                                                     | 0.0020                   | 2863     | 0.1894                     | 0.0334                     | 0.0028                   |
| 0007C7B153     | Temperate  | 3442                          | 0.2210                     | 0.0262                     | 0                               | 3302     | 0.2090                     | 0.0244                                                     | 0.0003                   | 3396     | 0.2197                     | 0.0268                     | 0.0003                   |
| 0007C7B720     | Temperate  | 1537                          | 0.0978                     | 0.0146                     | 0                               | 1458     | 0.0914                     | 0.0134                                                     | 0                        | 1537     | 0.0974                     | 0.0151                     | 0                        |
| 0007C7C1A6     | Temperate  | 2467                          | 0.1580                     | 0.0190                     | 0                               | 2327     | 0.1469                     | 0.0184                                                     | 0                        | 2436     | 0.1571                     | 0.0190                     | 0                        |
| 7C7B6DB        | Temperate  | 2360                          | 0.1566                     | 0.0287                     | 0.0024                          | 2262     | 0.1463                     | 0.0233                                                     | 0.0014                   | 2324     | 0.1550                     | 0.0292                     | 0.0023                   |
| 95600004913012 | Temperate  | 2797                          | 0.1768                     | 0.0162                     | 0                               | 2686     | 0.1668                     | 0.0173                                                     | 0                        | 2770     | 0.1762                     | 0.0173                     | 0                        |



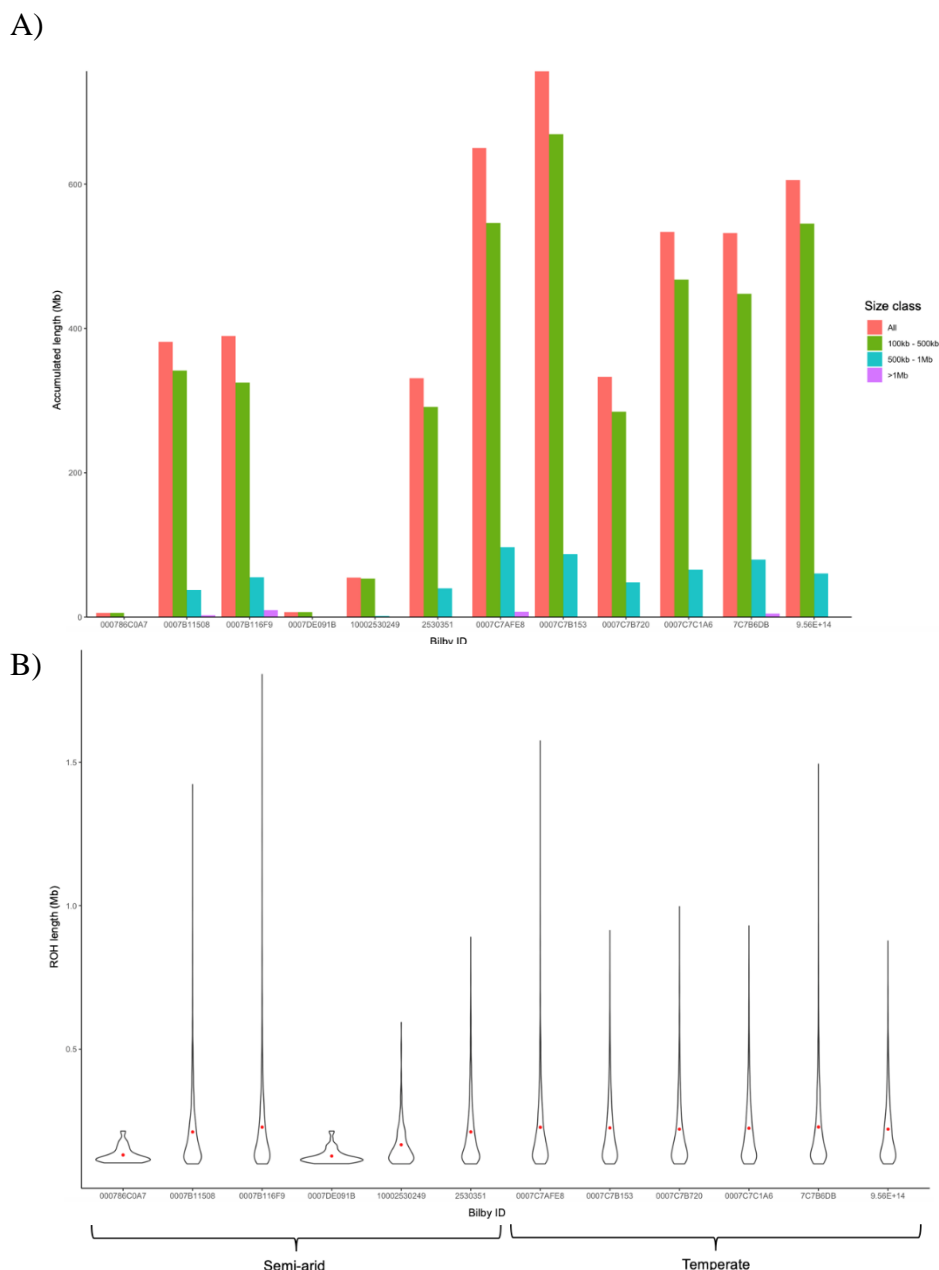

**Fig. S9.** A) ROH cumulative lengths for different ROH size classes for each of the 12 resequenced Ninu. B) Kernel density (violin) plots of the length of individual ROH in each genome. The red dot represents the mean ROH length.

### 2.3 Managed Metapopulation History and Study Sites

Ninu were periodically held in zoos for display purposes through the early part of the 20th century. In 1979, to help conserve the species a captive breeding colony was established from 19 founders at the Conservation Commission of the Northern Territory (CCNT), this colony grew to 294 individuals (114M; 111F; 69 unknowns) by 1991<sup>65</sup>. In 1985, Taronga Western Plains Zoo (TWPZ) acquired two pairs of bilbies from CCNT, however one pair escaped so another pair was acquired from CCNT in 1987<sup>65</sup>. Pairs were permitted to breed freely until mid-1989 when space constraints became an issue. Ninu were transferred from TWPZ to other institutions and in 1991 there were six zoos holding 62 captive Ninu representing 5 founders<sup>65</sup>. The Ninu studbook, documenting all records of captive Ninu since 1969, shows 110 Ninu have been sourced from the wild with only 43 individuals thought to be contributing to the population. As of August 2023, the zoo-based population consisted of 142 individuals representing 40 founder animals housed in 26 zoos and wildlife parks. Prior to 2016, captive

Ninu were managed as two separate management units, the WA/NT unit and the QLD unit. These were amalgamated in 2016 after it was agreed that the conservation needs for the species could be best met by ignoring previous taxonomic subdivisions and conserving them as a single taxonomic unit<sup>66</sup>. Ninu from the zoo-based population were intermittently released to fenced reserves, and non-fenced reserves, between 1998 and 2010 (Table S10). Individuals for these populations predominantly came from the WA/NT captive management unit, with 33% coming from Monarto and 47% from Kanyana (Table S10). After the 2015 Greater Bilby Summit<sup>67</sup>, a managed metapopulation strategy was developed with new fenced reserves established across the historical Ninu range using the zoo-population (ZAA) and the current reserves as source populations (Table S10).

**Table S10.** Release location, year, source population and number of individual bilbies released to fenced and non-fenced reserves between 1996 and 2021.

| Release location   | Fenced | Year | Source population     | Individuals released | Status of release location |
|--------------------|--------|------|-----------------------|----------------------|----------------------------|
| Perup (WA)         |        | 2010 | Peron CBC via Kanyana | 11                   | Extinct                    |
| Lorna Glen         |        | 2007 | Peron CBC via Kanyana | 21                   | Extinct                    |
| Lorna Glen         |        | 2009 | Peron CBC via Kanyana | 11                   |                            |
| Lorna Glen         |        | 2010 | Peron CBC via Kanyana | 14                   |                            |
| Dryandra Woodlands |        | 1998 | Kanyana               | 5                    | Extinct                    |
|                    |        | 1999 | Kanyana               | 11                   |                            |
|                    |        | 2000 | Kanyana               | 17                   |                            |
|                    |        | 2001 | Kanyana               | 8                    |                            |
|                    |        | 2002 | Kanyana               | 13                   |                            |
|                    |        | 2003 | Kanyana               | 13                   |                            |
|                    |        | 2008 | Monarto               | 8                    |                            |
|                    |        | 2009 | Monarto               | 2                    |                            |
|                    |        | 2013 | Peron CBC via Kanyana | 4                    |                            |
| Arid Recovery      | Y      | 2000 | Monarto/Yooka         | 9                    | Extant                     |
|                    |        | 2001 | Monarto               | 2                    |                            |
|                    |        | 2002 | Monarto               | 3                    |                            |
|                    |        | 2003 | Monarto               | 8                    |                            |
|                    |        | 2005 | Monarto               | 10                   |                            |
| Venus Bay          | N      | 2001 | Monarto               | 5                    | Extant                     |

| Release location        | Fenced | Year | Source population         | Individuals released | Status of release location |
|-------------------------|--------|------|---------------------------|----------------------|----------------------------|
|                         |        | 2002 | Monarto                   | 8                    |                            |
|                         |        | 2003 | Monarto                   | 6                    |                            |
|                         |        | 2005 | Monarto                   | 4                    |                            |
| Thistle Island          | N      | 1997 | Monarto                   | 5                    | Extant                     |
|                         |        | 1998 | Monarto                   | 6                    |                            |
|                         |        | 2000 | Monarto                   | 10                   |                            |
| Yookamurra Sanctuary    | Y      | 1996 | Winnellie                 | 3                    | Extant                     |
|                         |        | 1997 | Monarto                   | 2                    |                            |
|                         |        | 1998 | Monarto                   | 2                    |                            |
|                         |        | 1999 | Kanyana                   | 2                    |                            |
|                         |        | 2001 | Kanyana                   | 2                    |                            |
| Scotia Sanctuary        | Y      | 1997 | Yookamurra                | 2                    | Extant                     |
|                         |        | 1998 | Yookamurra                | 5                    |                            |
|                         |        | 2001 | Charleville               | 9                    |                            |
| Mt Gibson Sanctuary     | Y      | 2016 | Scotia                    | 21                   | Extant                     |
|                         |        | 2017 | ZAA /Yookamurra           | 8 / 7                |                            |
|                         |        | 2018 | Yookamurra / Thistle Is   | 5 / 20               |                            |
| Pilliga Sanctuary       | Y      | 2018 | Thistle Is / Scotia       | 30 / 30              | Extant                     |
| Mallee Cliffs Sanctuary | Y      | 2019 | Thistle Is / ZAA / Scotia | 30 / 10 / 10         | Extant                     |
| Dubbo Sanctuary         | Y      | 2019 | ZAA                       | 16                   | Extant                     |
|                         |        | 2020 | ZAA                       | 2                    |                            |
| Currawinya Sanctuary    | Y      | 2019 | ZAA / Thistle Is          | 17 / 3               | Extant                     |
|                         |        | 2020 | ZAA                       | 6                    |                            |
|                         |        | 2021 | ZAA                       | 10                   |                            |

## 2.4 Metapopulation Sample Collection and Analyses

A total of 363 Ninu sampled between 2011 and 2022 were included in the population genetics analysis. We utilised pre-existing reduced representation sequencing (RRS) (DArTseq, Diversity Arrays Technology, Canberra, Australia) data for 130 individuals<sup>56,68</sup>, in addition to

235 ear biopsy samples collected from pre-existing and newly established fenced reserves between 2016 and 2022 (Fig. 3A), including Arid Recovery Reserve (N = 16), Currawinya Sanctuary (N = 70; 35 founders + 35 subsequent generations), Dubbo Sanctuary (N = 64; 18 founders + 46 subsequent generations), Mallee Cliffs (N = 50; founders only), Mt Gibson (N = 26; founders only), Pilliga (N = 36; founders only), Scotia (N = 53), Thistle Island (N = 89), Venus Bay (N = 5), Yookamurra Wildlife Sanctuary breeding enclosure (Yooka1; N = 19) and main enclosure (Yooka2; N = 3). Wild ear biopsy samples were collected from Western Australia (Pilbara, N=5; Kimberley, N = 5)<sup>69</sup>, and from deceased individuals in Queensland (Birdsville, N = 1; Currawinya, N = 1).

Variants from the RRS data were called and filtered using previously published methods<sup>68,70</sup>. Briefly, reads were cleaned and demultiplexed using `process_radtags` in `Stacks v.2.61`<sup>71,72</sup> and truncated to 68-bp. `Trimomatic v.0.39`<sup>73</sup> was used to remove adapter contamination and trim low quality reads with the following parameters: `ILLUMINACLIP:Truseq3-SE.fa:2:30:10 SLIDINGWINDOW:4:5 LEADING:5`. Resulting reads were aligned to the Ninu reference genome (v1.9.fa) using `bowtie2 v.2.4.5`<sup>74</sup> with output converted and sorted using `samtools v.1.6`<sup>6</sup> `view` and `samtools sort`. Variants were called using `Stacks gstacks` and `populations`, outputting one random SNP per locus with a minimum minor allele frequency (MAF) of 0.01 and a minimum call rate across samples of 30%. Additional filtering for minimum average allelic depth (2.5x per allele), allelic coverage difference ( $\leq 80\%$ ), call rate ( $\geq 70\%$ ), locus heterozygosity ( $\leq 90\%$ ) and reproducibility ( $\geq 90\%$  matching genotypes between technical replicates) was performed in `R v.4.1.2`<sup>75</sup> following Wright *et al.*<sup>70</sup>. Putatively sex-linked SNPs were identified as loci with a heterozygous genotype in at least one female but homozygous in all males and removed. `Process radtags` and `Trimomatic` analyses were undertaken on a Pawsey Nimbus Supercomputer (64 vCPUs, 256GB RAM, 3TB attached storage) and all other analysis was on an Amazon Web Services r5.16xlarge cloud machine (65 vCPUs, 512GB RAM, 1TB attached storage, Ubuntu 20.04 LTS). Variant calling and filtering of the RRS data resulted in a total of 9,906 high-confidence SNPs retained for downstream analyses. Reproducibility was high, with an error rate between technical replicates of 1.16%.

To investigate the establishment of the current metapopulation, we separated the population genetic analyses into three groupings (Table 1). Group 1, individuals from the source populations in existence at the start of the 2016 metapopulation expansion (includes Arid Recovery, Scotia, Thistle Island, Venus Bay, Yookamurra1 and 2, ZAA and the wild Pilbara and Kimberley samples); Group 2, translocated individuals that founded the new metapopulation sites (includes Currawinya, Dubbo, Mallee Cliffs, Mt Gibson, Pilliga); and Group 3, offspring of the translocated individuals (includes Currawinya and Dubbo). Note that samples are included in both Group 1 and Group 2 analyses if they were translocated to a new site.

Observed heterozygosity, expected heterozygosity, and allelic richness were calculated using the `hierfstat` package v.0.5-10<sup>76</sup> in `R` for all three Groups. Genetic differentiation was visualised using principal coordinate analysis (PCoA) with the `dartR` package v.1.9.9.1<sup>77</sup>. The inbreeding coefficient  $F_{IS}$  was calculated for each population in Group 1 and Group 3 with the `diveRsity` package v1.9.90 and 1,000 bootstraps to estimate 95% confidence intervals<sup>78</sup>. We did not estimate  $F_{IS}$  for Group 2 translocated individuals as the Wahlund effect would likely influence results due to the mixing of diverse source populations at translocated sites<sup>79</sup>. For Groups 1-3, a subset of 5,000 randomly selected SNPs was used to estimate within population mean kinship (MK) by averaging pairwise comparisons estimated with `COANCESTRY v.1.0`<sup>80</sup> using the triodic maximum likelihood estimator (`TrioML`) to account for inbreeding.

For the Group 1 source populations, pairwise  $F_{ST}$  values (Table S11) were calculated with the `StAMPP` package v.1.6.3 and 2,000 bootstraps used to estimate the 95% confidence intervals<sup>81</sup>.

A subset of 5,000 randomly selected SNPs was used to estimate effective population size ( $N_E$ ) in NeEstimator v.2.1<sup>82</sup>, using the linkage disequilibrium method excluding singleton alleles with corrections<sup>83,84</sup> for bias and missing data. The 95% confidence intervals were taken from the jack-knifed estimate<sup>85</sup>. A fastSTRUCTURE analysis<sup>86</sup> was performed to estimate the number of genetic clusters,  $K$ , in the Group 1 source populations, testing  $K=1-10$  clusters with 10,000 iterations for each  $K$ . The “chooseK.py” script was used to select the optimum  $K$ .

1 **Table S11.** Genetic differentiation ( $F_{ST}$ ) and the 95% CIs between Group 1 source populations.

|                | Arid Recovery                 | Kimberley                     | Pilbara                       | Scotia                        | Thistle Island                | Venus Bay                     | Yookamurra 1                  | Yookamurra 2                  |
|----------------|-------------------------------|-------------------------------|-------------------------------|-------------------------------|-------------------------------|-------------------------------|-------------------------------|-------------------------------|
| Kimberley      | 0.1361<br>(0.1286;<br>0.1441) | NA                            |                               |                               |                               |                               |                               |                               |
| Pilbara        | 0.1167<br>(0.1087;<br>0.1253) | 0.0964<br>(0.0855;<br>0.1075) | NA                            |                               |                               |                               |                               |                               |
| Scotia         | 0.1737<br>(0.1673;<br>0.1803) | 0.1774<br>(0.1693;<br>0.1857) | 0.1606<br>(0.1516;<br>0.1696) | NA                            |                               |                               |                               |                               |
| Thistle Island | 0.0760<br>(0.0720;<br>0.0801) | 0.1155<br>(0.1078;<br>0.1236) | 0.1155<br>(0.1078;<br>0.1236) | 0.1712<br>(0.1653;<br>0.1770) | NA                            |                               |                               |                               |
| Venus Bay      | 0.2008<br>(0.1926;<br>0.2096) | 0.2901<br>(0.2783;<br>0.3012) | 0.2537<br>(0.2410;<br>0.2662) | 0.2735<br>(0.2637;<br>0.2830) | 0.1836<br>(0.1756;<br>0.1915) | NA                            |                               |                               |
| Yookamurra 1   | 0.2249<br>(0.2157;<br>0.2335) | 0.3067<br>(0.2946;<br>0.3189) | 0.3023<br>(0.2894;<br>0.3168) | 0.2390<br>(0.2302;<br>0.2477) | 0.1863<br>(0.1784;<br>0.1940) | 0.3943<br>(0.3818;<br>0.4064) | NA                            |                               |
| Yookamurra 2   | 0.1424<br>(0.1339;<br>0.1514) | 0.2204<br>(0.2089;<br>0.2319) | 0.1767<br>(0.1636;<br>0.1896) | 0.1916<br>(0.1828;<br>0.2002) | 0.1430<br>(0.1350;<br>0.1515) | 0.3252<br>(0.3129;<br>0.3373) | 0.1502<br>(0.1377;<br>0.1621) | NA                            |
| ZAA            | 0.0891<br>(0.0849;<br>0.0932) | 0.0863<br>(0.0805;<br>0.0922) | 0.0699<br>(0.0632;<br>0.0768) | 0.0791<br>(0.0756;<br>0.0825) | 0.0904<br>(0.0868;<br>0.0937) | 0.1881<br>(0.1800;<br>0.1961) | 0.1681<br>(0.1610;<br>0.1754) | 0.1319<br>(0.1240;<br>0.1400) |

2

The PCoAs showed evidence of population stratification in line with previous findings<sup>56</sup> and what would be expected based on the demographic and translocation history of the Ninu populations (Fig. S10). For example, two of the earliest established sites Yookamurra and Scotia are genetically distinct as shown in previous research, likely due to majority of the founding individuals of Scotia originally being of QLD descent<sup>56</sup>. fastSTRUCTURE analysis of the source populations resulted in four clusters, with all clusters represented to varying degrees in the ZAA metapopulation (Fig. S2). The ZAA metapopulation shows high within-population genetic variation due to the NT/WA and QLD population amalgamation in 2016 and the long-term management of multiple sites across Australia as a single metapopulation (Fig. 3A). ZAA also showed genetic similarity to most other populations due to ZAA being one of the main source populations for other populations nation-wide, and also due to the NT/WA and QLD population amalgamation in 2016 (Table S10 & S11). The wild Pilbara samples show lower within population genetic diversity than other sites and the Pilbara and Kimberley are most genetically similar to the ZAA population (Table S11). The Group 2 translocated sites show genetic structuring reflective of their respective source sites (Fig. S10B). The offspring (Group 3) show evidence of mixing of the translocated founders (Group 2; Fig. S10C).

## 2.5 MassARRAY SNP Panel Design

We used SNP loci identified from re-mapping raw DArTseq reads (63 – 72 bp) obtained from 12 Ninu populations (Table S12) to the Ninu reference genome (v.1.4.3). A total of 35,039 SNP loci were identified. Filtering of this SNP dataset used custom scripts (see Code Availability), and functions from dartR v.1.9.6<sup>77</sup> and SNPRelate v.0.9.19<sup>87</sup> to obtain high quality, informative SNP loci for the MassARRAY panel design. Data was cleaned by removing genotypes with a total read depth  $\leq 10$  to ensure high confidence in SNP calls and only selected reads containing a single SNP to ensure that DNA sequence flanking the SNP was stable for primer design. Reproducibility per SNP locus was calculated by comparing SNP genotypes obtained for replicate samples, after which technical replicates were removed from the dataset. A total of 283 tissue samples were used to identify potential SNP markers (Table S12).

Additional filters were applied to select SNP markers for individual identification: a minimum sequence length of  $\geq 50$  bp, SNP position between 25 and 45 bp, genotype quality score  $\geq 20$ , average read depth between 10 and 200, average genotyping rate per locus  $\geq 90\%$ , average genotyping rate per individual  $\geq 80\%$ , read coverage difference between reference and alternate SNP between 0.2 and 0.8, reproducibility scores  $\geq 95\%$ , read sequence similarity (hamming distance)  $< 25\%$ , SNP heterozygosity between 0.2 and 0.6 and minimum minor allele frequency  $\geq 0.3$ . Loci not in Hardy-Weinberg Equilibrium and those in Linkage Disequilibrium were removed. Where filtering rendered SNP loci monomorphic across the dataset, these were removed at the conclusion of each filtering step. A total of 74 SNP loci remained available for primer design following filtering.

We calculated the combined Probability of Identity ( $P_{ID}$ ) across the 74 loci using GENALEX v.6.5<sup>88</sup> to determine the minimum number of loci required to distinguish unique Ninu. We chose a  $P_{ID}$  threshold of 0.0001 equivalent to an exclusion probability  $> 99.9\%$  as suggested by Waits *et al.*<sup>89</sup>. This analysis indicated 10 markers were required to discriminate related (full-sibling) individuals ( $P_{IDsibs} = 19$ ).

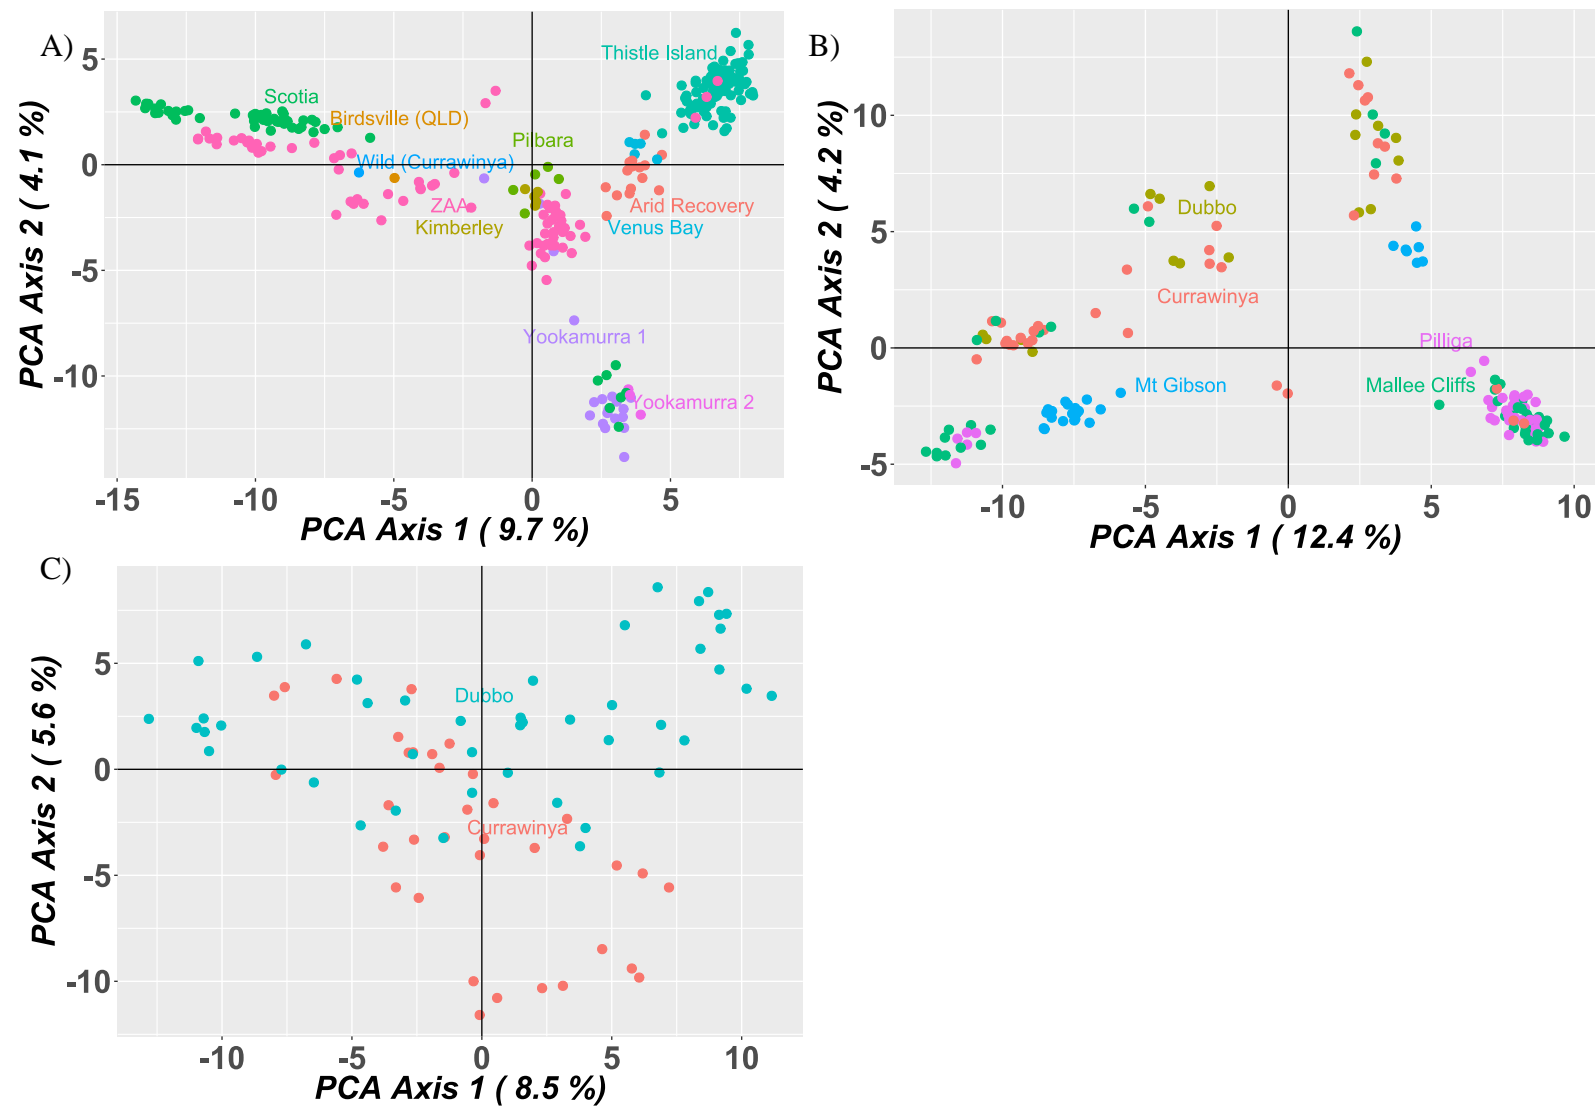

**Fig. S10:** PCoA from RRS data showing genetic variation of 363 Ninu across 13 populations of the managed metapopulation, separated into A) source populations, B) translocation population founders, and C) translocated population offspring (Table 1).



**Table S12.** Sample sizes of twelve populations included in the DArTseq dataset used for MassARRAY SNP panel design.

| Population                | No. of samples |
|---------------------------|----------------|
| Arid Recovery             | 16             |
| Currawinya                | 35             |
| Mallee Cliffs             | 49             |
| Mt Gibson                 | 26             |
| Pilbara                   | 6              |
| Kimberley                 | 3              |
| Pilliga                   | 36             |
| Scotia                    | 11             |
| Thistle Island            | 29             |
| Venus Bay                 | 5              |
| Yookamurra 1              | 20             |
| Yookamurra 2              | 3              |
| ZAA (captive populations) | 44             |

Using the male Ninu WGR data aligned to the reference genome (version 1.4.3), unmapped Y-chromosome contigs associated with seven marsupial Y genes (*HUWE1*, *KDM5D*, *MECP2*, *RBM10*, *UBE1Y*, *HCFC1* and *HSFY*) were identified through BLAST searches, totalling ~20 kb worth of Y-chromosome sequence. Contigs associated with three genes (*MECP2*, *RBM10* and *UBE1Y*) showed potential for some non-specific binding when BLASTed against the reference genome so were excluded from further analysis. Six primer sets were designed within intronic regions of the remaining four genes (*HUWE1*, *KDM5D*, *HCFC1* and *HSFY*; Table S13). The six markers were first tested on DNA extracted from tissue samples of eight known-sex individuals. PCRs were carried out using the Multiplex PCR Plus Kit (Qiagen, Catalogue 206152). Thermocycling conditions followed a protocol of 15 min at 95°C, then 35 cycles of 30 s at 94°C, 90 s at 60°C and 60 s at 72°C, with a final extension of 60°C for 30 min. Resultant fragments were run on a 3% agarose gel at 80V and stained with GelRed (Biotium) to be visualised under UV light. Presence of a distinct band indicated amplification of Y-chromosome sequence and therefore assigned males, while absence of a distinct band assigned females (Fig. S11a). The two best markers (*KDM5D.2* and *HCFC1.2*) were then tested on DNA extracted from scat samples of 10 known sex individuals and were found to successfully identify sex from these non-invasive samples (Fig. S11b).

**Table S13.** Primer information for the 6 Y-linked markers.

| Y Marker       | Forward Primer (5'-3')    | Reverse Primer (5'-3')     | Product Size (bp) | Optimal Annealing Temperature (°C) |
|----------------|---------------------------|----------------------------|-------------------|------------------------------------|
| <i>HUWE1</i>   | ACATGGGCTAAGG<br>GTGAATG  | TACTTCCTCGCCTA<br>AATAACAG | 170               | 49.9                               |
| <i>KDM5D.1</i> | AGTTGGGATATGG<br>AAACATTG | ATCTCCTGGATTG<br>GCTTCTG   | 226               | 49.6                               |
| <i>KDM5D.2</i> | TTGTCCCAAATGTT<br>CTAAGC  | GTTGGCAATACAG<br>AAAGAGG   | 155               | 47.2                               |
| <i>HCFC1.1</i> | TTGTTTGTGGAGC<br>AGGAGAG  | TTACCCTTCCCTAT<br>TCTTCC   | 152               | 48.5                               |
| <i>HCFC1.2</i> | ATCCTGCAATTATT<br>GTTTATG | TATGGTTATAAAC<br>TAGCATGTG | 132               | 46                                 |
| <i>HSFY</i>    | TAGGCAATAACAG<br>AGCTGTC  | ACTAACATAATGA<br>AAGGTATTC | 224               | 46.2                               |

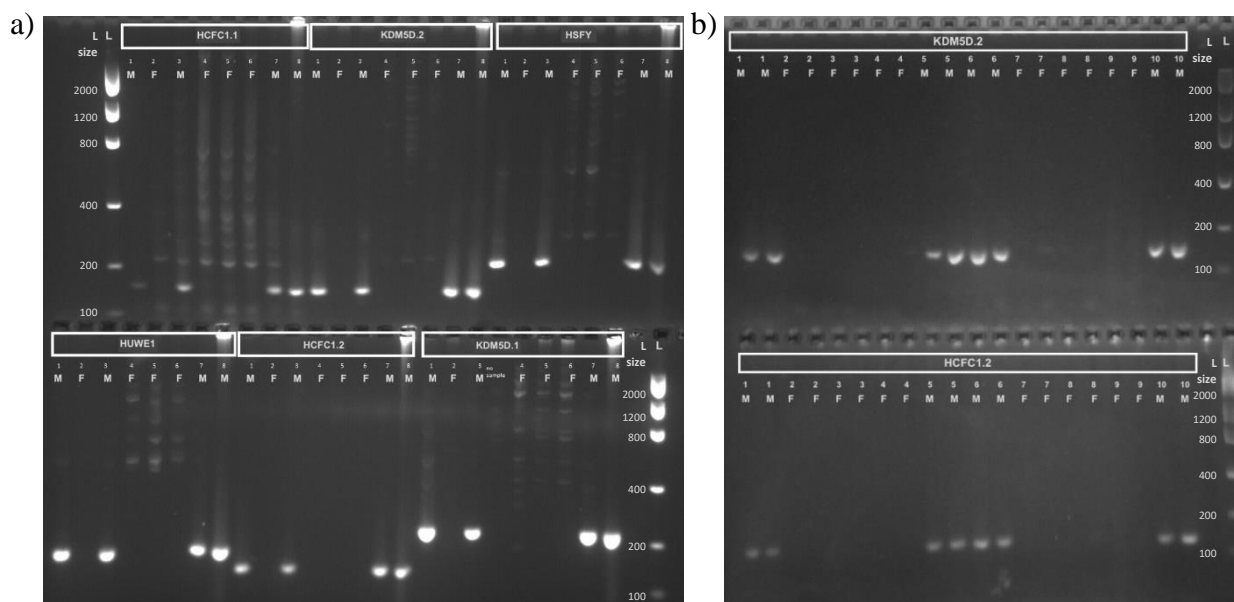**Fig. S11.** Gel electrophoresis of the Y-linked markers (*HUWE1*, *KDM5D.1*, *KDM5D.2*, *HCFC1.1*, *HCFC1.2*, *HSFY*) tested in a replicate experiment on DNA extracted from a) tissue samples from Western Australia, and b) scat samples of known sex individuals from Queensland in a single experiment (M = male, F = female). Numbers indicate different individuals. L: Low DNA mass ladder (Invitrogen). Refer to Table S13 for primer information.

We obtained the sequence information for the 74 identified SNP loci from the DArTseq output and combined this with the identified sex-linked markers. Sequences for loci of interest were sent to the Australian Genome Research Facility, Brisbane (AGRF) to undertake *in silico* multiplex assay design using the Assay Design Suite (v2.2, Agena Bioscience, San Diego, CA, USA). Agena MassARRAY accommodates highly multiplexed assay designs of up to 50 markers per panel. Following optimisation of assay design, 42 autosomal SNP and 5 sexing markers were included on the final panel (n = 47 markers total).

The Ninu SNP panel was tested first on a subset of high-quality tissue samples (Mt Gibson Sanctuary founders, N = 17) and faecal samples (scats) obtained from Mt Gibson Sanctuary (N = 26), the Pilbara (N = 10) and the Kimberley (N=10). Genomic DNA was extracted from tissue samples using a standard ‘salting out protocol’<sup>90</sup> with the addition of 3  $\mu$ L 10 mg/mL RNase A (Omega Biotek, Catalogue AC118) to the TNES buffer (50 mM Tris, pH 7.5, 400 mM NaCl, 20 mM EDTA, 0.5% SDS) to remove RNA contamination and re-suspension of DNA at the final step in low TE Buffer. Genomic DNA was extracted from scat samples using the Omega Biotek Mag-Bind Stool DNA 96 kit (Omega, USA, Cat No: M4016-01). Starting material for DNA extraction was obtained by briefly soaking and then gently washing scat samples in  $\sim$ 400  $\mu$ L of SLP buffer<sup>91</sup> to remove sloughed cells from the surface of the scat. Approximately 300  $\mu$ L of starting material was transferred to extraction tubes and DNA extraction carried out following the manufacturer’s instructions. At the final step, DNA was eluted using a 50% dilution of the elution buffer to reduce EDTA carryover and inhibition of downstream analyses. Samples were eluted in 100  $\mu$ L elution buffer. We subsampled 60  $\mu$ L of each DNA extract and further concentrated to 30  $\mu$ L for MassARRAY analysis.

SNP genotyping was carried out on the MassARRAY system (Agena Biosciences, San Diego, CA, USA). Amplification and extension reactions were performed using the iPLEX Gold Reagent Kit (Agena Bioscience, San Diego, CA, USA) according to the manufacturer’s protocols using 1  $\mu$ L of tissue or faecal DNA. Resultant SNP genotypes were identified by mass spectrometry and called using MassARRAY TyperAnalyzer 4.1 software (Agena Bioscience, San Diego, CA, USA) by AGRF. The genotypes identified from MassARRAY analysis were cross-checked with the expected genotypes from DArT data. We included  $\sim$ 10% repeats to ensure consistency across runs and to calculate the genotyping error rate.

Due to the poor performance of seven autosomal and one sex-linked marker in the initial trial, these loci were removed from the SNP panel. The remaining data was quality filtered and genotypes clustered to identify individuals from scats by the R package ‘ScatMatch’<sup>92</sup>. We only used samples and loci with  $\leq$  30% missing data. The clustering threshold ( $h$ ) used to group samples by genotypes was set to six that is any scats with less than six SNP differences were assigned to the same group or putative individual. From the trial results, we identified 3 Pilbara Ninu, 5 Kimberley Ninu, and 7 Mt Gibson Ninu from scats. All 17 Mt Gibson founders from tissue samples were identified as unique individuals.

Subsequently, we genotyped faecal samples from the Kiwirrkurra Ninu population case study using 35 autosomal and four sex-linked markers (note preliminary results indicated 19 markers were required to discriminate between related individuals with 99.9% certainty). Data quality filtering and genotype clustering were carried out in the R package ‘ScatMatch’<sup>92</sup>. Genotyping success rates at the sample level varied between years (76% in 2021, 49% in 2022) with locus amplification and genotyping error rates following QC also variable (amplification rate: 90% in 2021, 54% in 2022; allele error rate:  $0.001 \pm 0.000$  in 2021,  $0.014 \pm 0.004$  in 2022). Due to the variation in genotyping quality between years we used different QC thresholds retaining only samples and loci with  $\leq$  20% missing data in 2021 and retaining samples and loci with  $\leq$  30% missing data in 2022. Clustering thresholds used to group faecal samples by genotype to identify individuals varied also ( $h = 4$  in 2021,  $h = 6$  in 2022). Allowing more allelic mismatches for lower quality genotyping data reduces the impact of over-splitting genotypes, and therefore overestimating numbers of individuals, due to genotyping error.

Once scat samples were clustered (Fig. S12), we identified 12 unique Ninu across two colonies in 2021 (Table S3). In 2022, there appeared to be high turnover of individuals with only four of the 12 individuals from 2021 remaining in the population and detected again by the Kiwirrkurra Rangers. These included three females and one male (Table S3). A further 13 new

individuals were identified, including three individuals detected at two new sites where Ninu activity was not detected in 2021 (Ninu 23, 24, 25). All Ninu activity had shifted away from centres of activity in 2021 despite the collection locations being the same (Fig. 3B). In the case of the four ‘recaptured’ individuals, each was detected within the same general area they were detected in 2021, albeit with some small-scale movement between years. In 2021, one male individual was detected across two sites (MN & MU) with scats collected 6 weeks and 68km apart, and in 2022, a female was detected across two sites (NG & NAM) with scats collected two days and 37 km apart. The sex ratio appears to vary between collection years with more males represented in scat samples than females in 2021 (4F:7M:1U) and vice versa in 2022 (9F:5M:3U).

In order to undertake comparisons between the Kiwirrkurra Ninu and other locations in the managed metapopulation, we extracted the MassARRAY SNPs from the DArTseq dataset and unique genotypes from the trial, retained samples and loci with  $\leq 30\%$  missing data, and calculated genetic diversity statistics in the hierfstat R package v.0.5-11<sup>76</sup>. Cumulatively, the genetic diversity of the wild Ninu population at Kiwirrkurra is comparable to other wild populations (Extended Data Table 4).

The north-eastern and southern Ninu colonies are located approximately 70 km apart. To assess gene flow amongst populations, we visualised genetic relationships amongst individual Ninu detected in 2021 and 2022 using PCoA in GenAlEx and by calculating pairwise genetic relationships using the `gl.grm.network` function in `dartR`<sup>93</sup>. There was no obvious genetic structuring amongst Ninu sub-populations (colonies) identified in PCoA (Fig. S1A), although sample sizes are small, and our genetic markers are not overly sensitive to fine-scale structure. The pairwise genetic relatedness network indicates high genetic relatedness amongst individuals within the NAM sub-population and across collection years and that there are several close relationships (half-sibs and above) between individuals located in the northeastern MU sub-population and the southern NG, WW and WR sub-populations. Taken together, the lack of genetic structure and the movement of related individuals between northeastern and southern sub-populations indicates bilbies appear to be moving freely over the landscape.

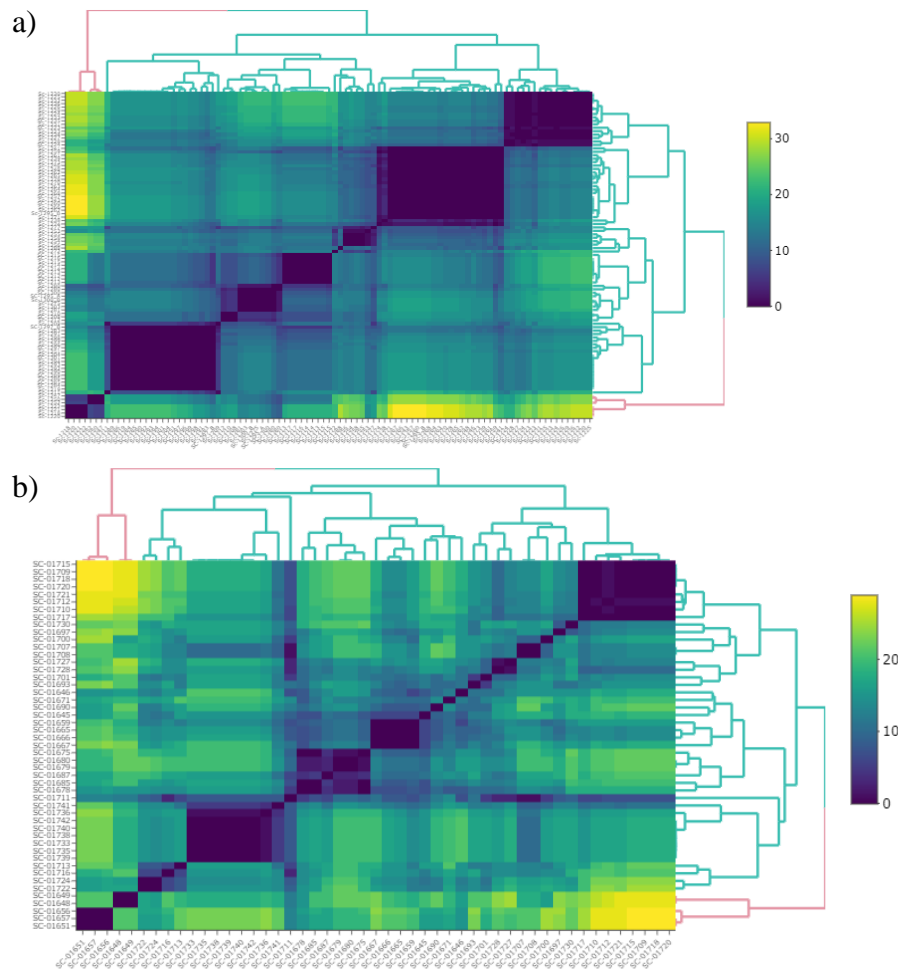

**Fig. S12.** Heat maps showing the number of allelic differences amongst scat samples collected in (a) 2021 and (b) 2022. Samples with similar genotypes are clustered on the diagonal. Sample IDs are shown on the X and Y axes.

## 2.6 Management Recommendations

For management of the metapopulation, the fastSTRUCTURE results show the optimum of  $k = 4$  clusters across the source Ninu populations whereby groups can be broadly separated into 1) Yookamurra group, 2) Scotia group, 3) ZAA/Arid Recovery/Pilbara group and 4) Thistle Island group (Fig. S2). It is anticipated as the newly established and existing populations continue to breed, further population differentiation within the metapopulation may occur. Based on the analysis of 363 Ninu across the metapopulation, the following recommendations have been provided to and implemented by the Bilby National Recovery Team Metapopulation Management Committee, since 2018, following the ‘research into management’ approach outlined in Hogg *et al.*<sup>94</sup>.

- Maximise genetic diversity across the metapopulation by sourcing individuals from the least similar population (as inferred from the  $F_{ST}$  and MK values) to the receiving population (Table 1; Table S10). That is, the more differentiated the populations the better in terms of long-term evolutionary potential and minimising effects of inbreeding.
- Maximise the value of the metapopulation by ensuring ongoing translocations are not using the same composition of individuals from the same source sites. That is, selection of individuals in different proportions from source sites will ensure that each location is somewhat genetically different from others in the metapopulation (Year 1 harvest: site A = 30, site B = 30; Year 2 harvest: site A = 20, site B = 40 – these two harvest events will

result in a genetic differentiation at the receiving sites due to the different proportions removed from the source sites). This will maintain, and potentially create genetic differentiation across the metapopulation providing for long-term maintenance of genetic diversity. It will also provide for future options when establishing new sites or augmenting existing sites. Due to the nature of the metapopulation, the natural processes of genetic drift will further facilitate genetic differentiation over time. See Table S10 for examples of this mixing the same source populations in different proportions in the releases undertaken after 2017.

- Populations that are genetically different but highly inbred (i.e. the mean inbreeding coefficient is higher than the founding groups/wild populations) should be mixed to reduce inbreeding effects (Table 2). Inbred populations that are genetically similar (show low  $F_{ST}$  values and high between population mean kinship) should not be mixed as this will potentially exacerbate inbreeding effects.
- Sourcing bilbies from wild sites to improve the current stock should be a priority. If possible, individuals from QLD should be sourced (either from QLD captive or wild) before individuals from WA/NT as the historic QLD management unit is under-represented in the current metapopulation.
- Collection and storage of genetic samples (ear biopsy in >80% ethanol stored in -20°C freezer) during translocation events and subsequent monitoring is essential to understanding the value of the translocations long-term, and our ability to monitor temporal changes.
- Another genetic survey from samples collected in 2024/25 (5-7 bilby generations) should be undertaken to assess the current translocations that are occurring. This will inform future translocation events and genetic management.
- A nationwide bilby survey that engages with Indigenous communities and uses scat sampling should be undertaken in 2024/25 to undertake a genetic assessment of wild populations and ascertain if the managed metapopulation is representative of the wild.

### **3 Ninu Genome Annotation and Gene Family Investigation**

#### **3.1 RNA extractions and transcriptome sequencing**

Total RNA was extracted from 25mg of each tissue (spleen, liver, lymph node, kidney, heart, tongue, ovary, uterus, pouch skin, mammary gland, salivary gland, and testes) using the RNeasy Mini Kit (Qiagen, Catalogue 74004) and from blood using the RNeasy Protect animal blood kit (Qiagen, Catalogue 73224). Contaminating genomic DNA was removed through an on-column digestion using the RNase-free DNase I set (Qiagen, Catalogue 79254). RNA was quantified using the Bioanalyzer RNA 6000 Nano Kit (Agilent Technologies, Catalogue 5067-1511) prior to TruSeq stranded total RNA library preparation, with ribosomal RNA depletion using the Illumina Ribo-zero gold kit at the Ramaciotti Centre for Genomics (RCG; UNSW). Tissue libraries (excluding blood) were sequenced as 150 bp PE reads across a single S1 flowcell on the Illumina NovaSeq 6000. The blood library was sequenced as 75 bp PE reads across four lanes of a HO flowcell on the Illumina NextSeq 500. The testis library was sequenced as 100 bp PE reads across a single S1 flowcell on the Illumina NovaSeq 6000.

#### **3.2 Transcriptome assembly**

Raw RNA-seq reads (~100M reads per sample) underwent quality and length trimming using Trimmomatic v.0.38<sup>73</sup> in paired-end mode, with the parameters ILLUMINACLIP:2:30:10, SLIDINGWINDOW:4:5, LEADING:5, TRAILING:5 and MINLEN:25. FastQC v.0.11.8<sup>95</sup> was used to assess sequence quality of both raw and trimmed reads. To generate the global transcriptome of 12 tissues (spleen, liver, lymph node, kidney, heart, tongue, ovary, uterus,

pouch skin, mammary gland, salivary gland and blood), trimmed reads from were then aligned to the genome v.1.5 using HISAT2 v.2.1.0<sup>96</sup> with default parameters and alignments were converted and sorted using samtools. Transcripts were assembled using StringTie v.2.1.3<sup>97</sup> and the resulting transcript models across the tissues were merged into a single global transcriptome using TAMA merge v.0.0<sup>98</sup> with a splice junction threshold of 3, a 3-prime threshold of 500 and the option to merge duplicate transcript groups. The resultant transcripts were then filtered by removing transcripts with weak evidence (only found in one tissue and FPKM < 0.1) or single-exon transcripts with either low read support or low coding potential. Coding potentials of transcripts were determined using CPC2 v.2.0<sup>99</sup>. Transcriptome completeness was assessed using BUSCO v.5.4.6 (mammalia\_odb10; n=9226) as above. TransDecoder v.2.0.1<sup>100</sup> was used to determine coding regions and open reading frames within transcripts. Following genome annotation, transcripts were assembled using StringTie v.2.1.3 with the GeMoMa genome annotation as a guide (see section 2.3) to generate FPKM counts for each transcript within the global transcriptome. The testis transcriptome was generated using the same methods as above.

In total 528 GB of raw sequencing data was produced across the 13 tissues, comprising 78 to 132 million read pairs per tissue. Over 99.36% of read pairs were retained post-trimming amongst the 13 tissues. The global transcriptome of 12 tissues was generated as above and aligned to v.1.5. The transcriptome (including non-coding transcripts) was composed of 39,106 genes and 303,420 isoforms with an average transcript length of 6,833 bp and an N50 of 13.4 kb (Extended Data Table 3). For all protein-coding transcripts, the longest open reading frame had an average transcript length of 1,010bp and N50 of 1,620bp. The global transcriptome contained 86.1% complete BUSCOs, with 3.0% fragmented and 10.9% missing mammalia\_odb10 genes (Extended Data Table 3). TransDecoder predicted 285,984 coding regions, of which 70.06% were complete (contained a start and stop codon) and 27,001 had unique hits to the Swiss-Prot non-redundant database. The testis transcriptome was generated as above and aligned to the reference genome v.1.5. The transcriptome was comprised on 37,034 genes and 82,964 isoforms with an average transcript length of 2,363 bp and an N50 of 3.93 kb (Extended Data Table 3). The testis transcriptome contained 75.5% complete BUSCOs, with 4.0% fragmented and 20.5% missing mammalia odb10 genes (Extended Data Table 3). TransDecoder predicted 75,224 coding regions, of which 64.58% were complete and 19,203 had unique hits to Swiss-Prot non-redundant database.

### 3.3 Genome annotation

Transcripts from the global transcriptome which represented isoforms which contained the longest complete ORF (16,316) were used as mRNA-based evidence for genome annotation. 49.44% of the genome was masked as repetitive and a total of 28,488 protein-coding genes were annotated in the genome of which 15,916 were based on mRNA evidence, 3,096 were based on protein homology evidence and the remaining were made *ab initio*.

A homology-based annotation was created using GeMoMa v.1.8<sup>101</sup> using the annotation from nine mammalian genomes (cow, human, opossum, mouse, Tammar wallaby, platypus, koala, Tasmanian devil, wombat). GeMoMa annotated 63,480 isoforms for 38,756 genes, with a median Ninu:opossum protein length ratio of 0.986 versus the *Monodelphis domestica* reference proteome. This was similar to the 39,106 genes in the global transcriptome and was rated as 96.0% complete by BUSCO v.5 (proteome mode). The average GeMoMa gene prediction was 1,120 bp (lacking UTRs) with an average of 6.32 exons per gene.

For the final repeat annotation, RepeatModeler v.2.0.1<sup>102</sup> was used to create a custom repeat database using the HiC-scaffolded genome with the repeat contigs added back (see above). RepeatMasker v.4.1.0 was used to identify and mask repeats from this library (excluding low

complexity regions and simple repeats) on the final version of the assembly<sup>103</sup> (see Supplementary Excel). In total, 47.87% of the assembly was annotated as interspersed repeats, with L1 LINEs being the dominant repeat type (20.91% assembly), and a further 6.22% as low complexity and simple repeats (Table S14). Additional annotation of RNA genes was performed with barrnap v.0.9<sup>104</sup> (rRNA) and Infernal v.1.1.3<sup>105</sup> (tRNA). Telomeres were predicted using Diploidocus v.1.3.1<sup>12</sup> with additional telomere repeat sequences predicted using tidk v.0.1.5 [<https://github.com/tolkit/telomeric-identifier>]. Nuclear mitochondrial DNA fragments (NUMTs) identified using NUMTFinder v.0.5.3<sup>25</sup> using the assembled Ninu mtDNA genome (above).

**Table S14:** Ninu reference genome repeat statistics

| Repeat Classes            |                  |                      |              |
|---------------------------|------------------|----------------------|--------------|
| Total Sequences           | 609              |                      |              |
| Total Length (bp)         | 3,655,732,724    |                      |              |
| Class                     | Count            | bp Masked            | % masked     |
| DNA                       | 298              | 31,092               | 0.00         |
| Ginger-1                  | 518              | 182,063              | 0.00         |
| TcMar-Mariner             | 2,024            | 313,297              | 0.01         |
| TcMar-Tc1                 | 10,759           | 936,058              | 0.03         |
| TcMar-Tigger              | 22,012           | 5,637,191            | 0.15         |
| hAT                       | 1,931            | 379,419              | 0.01         |
| hAT-Charlie               | 110,993          | 16,572,073           | 0.45         |
| hAT-Tip100                | 43,540           | 7,675,332            | 0.21         |
| LINE                      |                  |                      |              |
| CR1                       | 373,723          | 66,547,716           | 1.82         |
| Dong-R4                   | 9,918            | 31,56,447            | 0.09         |
| L1                        | 1,987,892        | 764,315,940          | 20.91        |
| L2                        | 836,612          | 173,028,625          | 4.73         |
| RTE                       | 11,138           | 1,986,365            | 0.05         |
| RTE-BovB                  | 87,021           | 42,912,194           | 1.17         |
| LTR (no subclass)         | 315              | 48,905               | 0.00         |
| ERV1                      | 8,427            | 4,724,499            | 0.13         |
| ERVK                      | 30,098           | 15,296,680           | 0.42         |
| ERVL                      | 4,293            | 2,198,823            | 0.06         |
| Gypsy                     | 2,566            | 1,062,056            | 0.03         |
| SINE                      |                  |                      |              |
| Alu                       | 10,384           | 2,105,586            | 0.06         |
| MIR                       | 2,657,873        | 401,388,147          | 10.98        |
| tRNA-RTE                  | 597              | 69,807               | 0.00         |
| Unknown                   | 1,222,700        | 239,347,740          | 6.55         |
| <i>Total Interspersed</i> | <i>7,435,632</i> | <i>1,749,916,055</i> | <i>47.87</i> |
|                           |                  |                      |              |
| Low complexity            | 129,569          | 968,757              | 0.27         |
| Simple repeat             | 1,155,394        | 211,868,487          | 5.80         |
| rRNA                      | 8,718            | 2,131,914            | 0.06         |
| snRNA                     | 1,297            | 100,347              | 0.00         |
| Total                     | 8730,610         | 1,973,706,560        | 53.99        |



### 3.4 Chromosome synteny plots

To further validate the chromosome-level assembly and investigate chromosomal rearrangements in the Ninu, high-level synteny was plotted against six other marsupial species (Table S15). GENESPACE v.1.3.1<sup>106</sup> was used to plot genomic synteny.

**Table S15.** Marsupial reference genomes used for chromosome synteny plots.

| Species                                                    | Genbank ID      | Assembly ID     | Reference               |
|------------------------------------------------------------|-----------------|-----------------|-------------------------|
| Mardo ( <i>Antechinus flavipes</i> )                       | GCA_016432865.1 | AdamAnt         | <sup>107</sup>          |
| Monito del Monito ( <i>Dromiciops gliroides</i> )          | GCF_019393635.1 | mDroGli1.pri    | VGP*                    |
| Short-tailed Opossum ( <i>Monodelphis domestica</i> )      | GCF_000002295.2 | MonDom5         | <sup>108</sup>          |
| Devil ( <i>Sarcophilus harrisi</i> )                       | GCF_902635505.1 | mSarHar1.11     | <sup>109</sup>          |
| Brush-tailed possum ( <i>Trichosurus vulpecula</i> )       | GCF_011100635.1 | mTriVul1.pri    | <sup>110</sup>          |
| Agile gracile mouse opossum ( <i>Gracilinanus agilis</i> ) | GCA_016433145.1 | AgileGrace      | <sup>111</sup>          |
| Koala ( <i>Phascolarctos cinereus</i> )                    | n/a             | 04Oct2019_BU56K | <i>Unpublished data</i> |

\* Provided by the Vertebrate Genome Project

### 3.5 X-chromosome read depth and meiotic immunofluorescence

#### *X chromosome read depth*

DeepTools bamCoverage was used to calculate read depth of male Illumina data in 20kb windows. A heatmap of the read depth ratios (versus the PAR mean) was plotted with the R package LSD<sup>112</sup>.

#### *Meiotic spreads and immunofluorescence (IF)*

Using the testis from the Ninu male, spermatocyte spreads were obtained as previously described<sup>113</sup>. Briefly, a piece of the testicular biopsy was carefully minced on a slide and treated with 1% Lipsol for 30 min at room temperature. Then, a fixative solution containing 4% paraformaldehyde was added, and slides were kept in a humid chamber for two hours. Slides were washed in 1% photo-flo solution and further processed for immunofluorescence, or frozen at  $-20^{\circ}\text{C}$  until use. Immuno-staining of meiocytes was performed using rabbit antibody against SYCP3 (Abcam, Catalogue #ab15093, 1:100) and rabbit antibody against SYCP1 (Abcam, Catalogue #ab15087) incubated overnight at  $4^{\circ}\text{C}$  in a humid chamber. Fluorochrome-conjugated secondary antibodies were diluted in PBST (Tween 0.05% in PBS) and incubated for 1 h at  $37^{\circ}\text{C}$  in a humid chamber. DNA was counterstained with anti-fade solution containing 8  $\mu\text{g/ml}$  DAPI (4',6'-diamidino-2-phenylindole).

### 3.6 Gene family investigation

To investigate the evolution of gene family size in Ninu, we compared the proteome with those of other marsupials (opossum, Tasmanian devil, koala, brown antechinus, and Tammar wallaby), eutherians (human, mouse, and cow), and a monotreme (platypus) (Table S16). These taxa were selected to elucidate whether changes in gene family sizes occurred specifically in the Ninu lineage or is shared across other marsupials. Protein sequences were re-annotated using GeMoMa v.1.8<sup>101</sup> using the same nine mammalian reference genomes as for the Ninu (above, Table S16) to minimise the impact of incomplete annotations on analyses of gene family sizes, in particular, to avoid inflated estimates of gene family contraction. To control

for pseudogenes, we removed genes annotated as "Predicted protein" or "Reverse transcriptase homologs" from further analyses. Orthologous genes were identified with OrthoFinder v.2.4.01 using default settings with the 10 annotated proteomes as inputs. Orthogroups were putatively assigned a gene according to the most commonly occurring annotation within the orthogroup.

**Table S16.** Assemblies used for GeMoMa annotation and gene expansion analyses

| Common name      | Scientific name                 | Assembly ID                                                 | Database                           | Reference |
|------------------|---------------------------------|-------------------------------------------------------------|------------------------------------|-----------|
| Brown antechinus | <i>Antechinus stuartii</i>      | antechinusM_pseudo hap2.1.proteins.fa <sup>#</sup>          | GigaScience Database <sup>20</sup> | 114       |
| Tasmanian devil  | <i>Sarcophilus harrisii</i>     | mSarHar1.11 <sup>*#</sup>                                   | Ensembl <sup>24</sup>              | 109       |
| Koala            | <i>Phascolarctos cinereus</i>   | phaCin_unsw_v4.1 <sup>*#</sup>                              | Ensembl <sup>23</sup>              | 115       |
| Wombat           | <i>Vombatus ursinus</i>         | bare-nosed_wombat_genome_assembly <sup>*</sup>              | Ensembl                            |           |
| Tammar wallaby   | <i>Notamacropus eugenii</i>     | Meug_1.0 <sup>*#</sup>                                      | Ensembl                            | 116       |
| Opossum          | <i>Monodelphis domestica</i>    | ASM229v1 <sup>*#</sup>                                      | Ensembl <sup>21</sup>              | 108       |
| Platypus         | <i>Ornithorhynchus anatinus</i> | mOrnAna1.p.v.a <sup>*</sup><br>mOrnAna1.pri.v4 <sup>#</sup> | RefSeq <sup>22</sup>               | 117       |
| Human            | <i>Homo sapiens</i>             | GRCh38.p13 <sup>*#</sup>                                    | Ensembl                            |           |
| Mouse            | <i>Mus musculus</i>             | GRCm39 <sup>*#</sup>                                        | Ensembl                            |           |
| Cow              | <i>Bos taurus</i>               | ARS-UCD1.2 <sup>*#</sup>                                    | Ensembl                            |           |

\* Used for GeMoMa annotation; <sup>#</sup>Used in gene expansion analysis.

A dated species tree was constructed using MCMCTree in PAML v.4.9<sup>118</sup> following Jeffares *et al.*<sup>119</sup>. We retrieved the species tree topology and prior distributions of the internal node ages, including the root<sup>120,121</sup> (Table S17). We aligned all single-copy orthogroups identified by OrthoFinder ( $n = 3,181$ ) using MAFFT v.7.407<sup>122</sup> with default settings and we filtered out poorly aligned regions using TrimAl v.1.4.15<sup>123</sup> with `--automated1`. Aligned and trimmed sequences were concatenated with AMAS v.1.0<sup>124</sup> and used as input to MCMCTree. First, MCMCTree estimated branch lengths with baseml, followed by divergence time estimation with approximate likelihood calculation. We used the F81 substitution model (`model=2`) and accounted for among-lineage rate variation using an independent-rates relaxed clock (`clock=2`). The posterior distribution was estimated by drawing 20,000 MCMC samples, with a thinning interval of 10 steps, after 2000 discarded burn-in samples.

**Table S17.** Secondary node calibrations used for the species tree.

| Node                                                                                      | Uniform calibration prior* (Myr) | Reference |
|-------------------------------------------------------------------------------------------|----------------------------------|-----------|
| Mammalia (root)                                                                           | 164.9–250.8                      | 121       |
| Theria<br>(Placentalia, Marsupialia)                                                      | 123.3–166.2                      | 121       |
| Placentalia<br>(Euarchontoglires, cow)                                                    | 73.2–77.4                        | 121       |
| Euarchontoglires<br>(mouse, human)                                                        | 69.6–73.8                        | 121       |
| Marsupialia<br>(Eomarsupialia, opossum)                                                   | 44.7–70.4                        | 121       |
| Eomarsupialia<br>(Diprotodontia, Agreodontia)                                             | 58.8–67.8                        | 120       |
| Diprotodontia<br>(koala, tammar wallaby)                                                  | 49.9–58.3                        | 120       |
| Agreodontia<br>(Ninu, Tasmanian devil, antechinus)                                        | 57.3–66.3                        | 120       |
| <i>Antechinus stuartii</i> - <i>Sarcophilus harrisii</i><br>(Tasmanian devil, antechinus) | 18.1–22.7                        | 120       |

We tested for expansions of gene families under a birth-death model using CAFE v.5.0<sup>125</sup>. The gene counts from OrthoFinder and dated species tree from MCMCTree were used as inputs for CAFE. To minimise the impact of gene families (orthogroups) with highly variable gene counts when estimating lambda, gene families with 100 or more genes in any one lineage were analysed separately. For both subsets of gene families, we estimated multiple lambdas for monotremes, marsupials, and eutherians (-y) using a Poisson root frequency distribution (-p) and a model to account for genome assembly and annotation errors (-e). First, we analysed gene families with fewer than 100 genes to estimate the optimal lambdas for each of the three lineages. The multiple estimated lambdas were then fixed per lineage (-m) for gene families with 100 or more genes in any lineage. Gene ontology (GO) term annotation was conducted on orthogroups deemed to be significantly expanded in Ninu. We used GOnet<sup>52</sup> with the biological process namespace and generic GO slim subset for humans.

Across all 10 species, 74,591 genes were annotated as a "Predicted protein" and 123,379 genes were annotated as a "Reverse transcriptase homolog". These were omitted from further analyses, leaving a total of 197,970 annotated genes (Table S18). In total, 185,847 annotated genes (93.9%; Table S18) were assigned into 17,082 orthogroups; 6350 orthogroups (37.2%) had all species present and 3181 were single-copy orthogroups (18.6%).

**Table S18.** Number of genes annotated and assigned to orthogroups. Genes annotated by GeMoMa as either “Predicted protein” or “Reverse transcriptase homologs” were omitted and orthology assignment was conducted on the remaining genes.

| Species          | Annotated genes (GeMoMa) |                    |                                |          | Orthology assignment (OrthoFinder) |                                       |
|------------------|--------------------------|--------------------|--------------------------------|----------|------------------------------------|---------------------------------------|
|                  | Total genes              | Predicted proteins | Reverse transcriptase homologs | Retained | Genes assigned to an orthogroup    | Genes in species-specific orthogroups |
| Brown antechinus | 32,500                   | 7044               | 11,624                         | 18,668   | 18,086                             | 199                                   |
| Ninu             | 38,417                   | 9948               | 13,000                         | 22,948   | 21,129                             | 464                                   |
| Cow              | 36,299                   | 7630               | 11,831                         | 19,461   | 18,165                             | 819                                   |
| Human            | 35,649                   | 9371               | 11,606                         | 20,977   | 19,564                             | 797                                   |
| Opossum          | 39,011                   | 4737               | 14,077                         | 18,814   | 17,552                             | 777                                   |
| Mouse            | 38,602                   | 9204               | 12,992                         | 22,196   | 20,520                             | 2082                                  |
| Tammar wallaby   | 31,166                   | 8587               | 10,582                         | 19,169   | 17,502                             | 207                                   |
| Platypus         | 28,540                   | 4600               | 11,946                         | 16,546   | 16,088                             | 1038                                  |
| Koala            | 37,264                   | 7571               | 13,753                         | 21,324   | 19,863                             | 240                                   |
| Tasmanian devil  | 32,514                   | 5899               | 11,968                         | 17,867   | 17,378                             | 67                                    |
| Total            | 349,962                  | 74,591             | 123,379                        | 197,970  | 185,847                            | 6690                                  |

The CAFE analysis successfully analysed 12,653 (74.07%) orthogroups (i.e., the gene family was present at the root of the tree in the most recent common ancestor of all mammals). Of these orthogroups, 1,206 consisted of one or more lineages that were considered significantly fast evolving by CAFE (Extended Data Fig. 3). We found 459 orthogroups that were significantly expanded in Ninu and successfully annotated 369/435 unique genes using GOnet. Missed GO term annotations were either due to genes lacking an annotation in humans (e.g., *CYP2A11* and *CYP2B4* from *Oryctolagus cuniculus*) or absent from UniProt altogether. Gene families putatively expanded in the Ninu were primarily involved in anatomical structure development (GO:0048856, GO:0009790, GO:0048646, GO:0000902), response to stress (GO:0006950, GO:0007165), and a range of metabolic processes (Table S5).

### 3.7 Olfactory receptor genes

Although adjustment of clustering parameters may impact orthology assignment and the outcome of gene family expansion tests, the Ninu remains with the highest number of annotated ORs<sup>126,127</sup>. In comparison to previously reported OR gene copy numbers of the cow, human, mouse, and platypus; the total number of annotated OR genes here were far smaller. However, the totals here correspond approximately to the number of intact OR genes. Between 17.3% and 59.4% of mammalian OR genes have become pseudogenes. These pseudogenes may have been discarded when “Predicted proteins” and “Reverse transcriptase homologs” were omitted prior to gene family expansion analyses. Assuming that only intact OR genes were annotated,

Ninu have more OR genes than some eutherian mammals such as cows and dogs, but considerably fewer than elephants. Targeted analysis of OR genes is needed to characterise the repertoire of ORs in the Ninu, particularly the classification of both functional genes and pseudogenes.

*ORID2* and *ORID5* orthogroups are presented in Supplementary Excel. Each orthogroup consists of the estimated likelihood that the orthogroup is 'real', the change of copy number in the Ninu lineage, and whether the change was deemed significant by CAFE. *ORID2* genes were assigned into 362 orthogroups, with 17 orthogroups deemed significantly expanding by CAFE (Supplementary Excel). *ORID5* genes were assigned into 165 orthogroups, with 10 significantly expanding (Supplementary Excel). Although adjustment of clustering parameters may affect orthology assignment and the outcome of gene family expansion tests, the Ninu remains with the highest number of annotated ORs. Although the total number of annotated OR genes in our dataset is smaller than those previously reported for cow, human, mouse, and platypus; our totals correspond approximately to the number of intact OR genes<sup>126</sup> and may be the consequence of discarding pseudogenes. Assuming that only intact OR genes were annotated, Ninu have more OR genes than some eutherian mammals, such as cow and mouse, but considerably fewer than elephants (1,948 intact OR genes<sup>128</sup>). Further targeted analysis of OR genes is needed to definitively characterise the repertoire of ORs in the Ninu, particularly the classification of both functional genes and pseudogenes.

### 3.8 Characterisation of Ninu immune genes

Immune genes were annotated using multiple search strategies. BLAST v.2.2.30<sup>129</sup> was used to search the Ninu reference assembly, associated annotation files and/or transcriptomes using published marsupial, monotreme and eutherian immune gene sequences as queries, with default parameters and an e-value threshold of 10 so as not to exclude any potential gene candidates. HMMER v.3.2<sup>130</sup> was also used to identify putative genes within immune families that are known to contain duplications in other marsupials<sup>131,132</sup>, such as NK receptors. Hidden Markov models (HMM) were constructed using ClustalW alignments of published marsupial and eutherian immune gene sequences, which were then used to search all genomes and transcriptomes using HMMER v.3.2 with an e-value threshold of 10. For variable segments of T cell receptor and Immunoglobulin families, recombination signal sequences (RSS) downloaded from the IMGT database<sup>133</sup> and published koala sequences<sup>134</sup>, were aligned using ClustalW and used to construct HMM. These RSS HMM were then used to search the Ninu genome (v1.5) using HMMER, to identify conserved RSS which flank each variable segment. For NK receptors, putative NKC and LRC sequences from BLAST and HMMER searches were queried against the Swiss-Prot nonredundant database, and any sequences with top hits to Swiss-Prot NK genes, marsupial-specific NK genes or the PFAM immunoglobulin domain PF00047 or C-type lectin domain PF00059 HMM model were retained. Immunoglobulin superfamily (IGSF) domains within putative NK sequences from each species were identified using the SMART database, and IGSF domains within 5kb were considered exons of a single LRC gene. Putative immune genes were named following the appropriate nomenclature for each family, with duplicated genes named according to their genomic location from the 5' to 3' end of the locus.

MHC Class I and II genes were named based on their evolutionary relationship with other marsupial MHC genes. Phylogenetic trees were constructed using the neighbour-joining method<sup>135</sup> with 1000 bootstraps<sup>136</sup> in MEGA11<sup>137</sup>. Genes with clear homologous relationships to marsupial MHC genes were assigned names based on their marsupial counterparts. Genes with no clear relationship were assigned species-specific names. Ninu MHC Class II genes were classified into three classical clusters; DA, DB and DC and one nonclassical cluster;

DM<sup>138,139</sup> based on their homology to marsupial genes (Fig. S3). For MHC Class I, rapid evolution means that clear orthologous relationships across marsupial genes are rarely observed. Classical class I genes are generally highly polymorphic in comparison to nonclassical class I<sup>140</sup>. Genetic variability within the  $\alpha 1$ ,  $\alpha 2$  and  $\alpha 3$  domains (exons 2, 3 and 4 respectively) were assessed for classification.

Class II genes were classified into classical and non-classical based on homology to other marsupial class II genes. Two genes were classified as non-classical (*DMA* and *DMB*) class II genes. For the MHC-I genes, clear homology and strong bootstrap support was shown between the UM gene of the Tasmanian devil (*Saha*), opossum and Ninu (*Mala*) (Fig. S3). Two class I genes showed characteristics of classical MHC genes based on genetic variability. Mala-*UA* and -*UB* had between five and 38 variants in each of the  $\alpha 1$ ,  $\alpha 2$  and  $\alpha 3$  domains, in comparison to the predicted non-classical genes that had between zero and six variants within a domain (Table S19).

**Table S19:** Genetic variability of the functional  $\alpha 1$ ,  $\alpha 2$  and  $\alpha 3$  domains of the identified MHC-I genes

| Gene            | # of SNPs at each domain |            |            |
|-----------------|--------------------------|------------|------------|
|                 | $\alpha 1$               | $\alpha 2$ | $\alpha 3$ |
| Mala- <i>UA</i> | 5                        | 15         | 15         |
| Mala- <i>UB</i> | 6                        | 38         | 18         |
| Mala- <i>UC</i> | 6                        | 1          | 0          |
| Mala- <i>UD</i> | 3                        | 0          | 2          |
| Mala- <i>UE</i> | 2                        | 1          | 2          |
| Mala- <i>UM</i> | 1                        | 1          | 2          |

#### 4 Supplementary References

1. Weisenfeld, N. I., Kumar, V., Shah, P., Church, D. M., & Jaffe, D. B. Direct determination of diploid genome sequences. *Genome Res.* **27**: 757-67 (2017).
2. Wenger, A. M., et al. Accurate circular consensus long-read sequencing improves variant detection and assembly of a human genome. *Nat. Biotechnol.* **37**: 1155-62 (2019).
3. Guan, D., et al. Identifying and removing haplotypic duplication in primary genome assemblies. *Bioinform.* **36**: 2896-98 (2020).
4. Zheng, G. X., et al. Haplotyping germline and cancer genomes with high-throughput linked-read sequencing. *Nat. Biotechnol.* **34**: 303-11 (2016).
5. Li, H. & Durbin, R. Fast and accurate short read alignment with Burrows–Wheeler transform. *Bioinform.* **25**: 1754-60 (2009).
6. Li, H., et al. The sequence alignment/map format and SAMtools. *Bioinform.* **25**: 2078-79 (2009).
7. Yeo, S., Coombe, L., Warren, R. L., Chu, J., & Birol, I. ARCS: Scaffolding genome drafts with linked reads. *Bioinform.* **34**: 725-31 (2018).
8. Warren, R. L., et al. LINKS: Scalable, alignment-free scaffolding of draft genomes with long reads. *GigaScience* **4**: s13742-015-0076-3 (2015).
9. English, A. C., et al. Mind the gap: Upgrading genomes with Pacific Biosciences RS long-read sequencing technology. *PLoS One* **7**: e47768 (2012).
10. Walker, B. J., et al. Pilon: An integrated tool for comprehensive microbial variant detection and genome assembly improvement. *PLoS One* **9**: e112963 (2014).
11. Bushnell, B. *BBTools*. 2014 23 August 2020]; Available from: <https://sourceforge.net/projects/bbmap/>.
12. Chen, S. H., et al. Chromosome-level de novo genome assembly of *Telopea speciosissima* (New South Wales waratah) using long-reads, linked-reads and Hi-C. *Mol. Ecol. Resour.* **22**: 1836-54 (2022).
13. Edwards, R. J. *GapSpanner: Genome assembly gap long read support and reassembly tool*. 2021.
14. Kolmogorov, M., Yuan, J., Lin, Y., & Pevzner, P. A. Assembly of long, error-prone reads using repeat graphs. *Nat. Biotechnol.* **37**: 540-46 (2019).
15. Kundu, R., Casey, J., & Sung, W.-K. HyPo: Super fast & amp; accurate polisher for long read genome assemblies. *bioRxiv*: 2019.12.19.882506 (2019).
16. Kokot, M., Długosz, M., & Deorowicz, S. KMC 3: Counting and manipulating k-mer statistics. *Bioinform.* **33**: 2759-61 (2017).
17. Li, H. Minimap2: Pairwise alignment for nucleotide sequences. *Bioinform.* **34**: 3094-100 (2018).
18. Putnam, N. H., et al. Chromosome-scale shotgun assembly using an in vitro method for long-range linkage. *Genome Res.* **26**: 342-50 (2016).
19. Li, H. Aligning sequence reads, clone sequences and assembly contigs with BWA-MEM. *arXiv* (2013).
20. Goloborodko, A., Abdennur, N., Venev, S., hbbrandao, & gfudenberg, mirnylab/pairtools: v0. 2.2. 2019, Zenodo.
21. Abdennur, N. & Mirny, L. A. Cooler: scalable storage for Hi-C data and other genomically labeled arrays. *Bioinform.* **36**: 311-16 (2020).
22. Ramírez, F., et al. High-resolution TADs reveal DNA sequences underlying genome organization in flies. *Nat. Comms.* **9**: 1-15 (2018).
23. Kerpedjiev, P., et al. HiGlass: Web-based visual exploration and analysis of genome interaction maps. *Genome Biol.* **19**: 1-12 (2018).
24. Xu, G.-C., et al. LR\_Gapcloser: A tiling path-based gap closer that uses long reads to complete genome assembly. *GigaScience* **8** (2018).

25. Edwards, R. J., et al. Chromosome-length genome assembly and structural variations of the primal Basenji dog (*Canis lupus familiaris*) genome. *BMC Genomics* **22**: 188 (2021).
26. Davey, N. E., Shields, D. C., & Edwards, R. J. SLiMDisc: SWhort, linear motif discovery, correcting for common evolutionary descent. *Nucleic Acids Res.* **34**: 3546-54 (2006).
27. Cheng, H., et al. Haplotype-resolved assembly of diploid genomes without parental data. *Nat. Biotechnol.* **40**: 1332-35 (2022).
28. Uliano-Silva, M., et al. MitoHiFi: a python pipeline for mitochondrial genome assembly from PacBio high fidelity reads. *BMC Bioinform.* **24**: 288 (2023).
29. Allio, R., et al. MitoFinder: Efficient automated large-scale extraction of mitogenomic data in target enrichment phylogenomics. *Mol. Ecol. Resour.* **20**: 892-905 (2020).
30. Meng, G., Li, Y., Yang, C., & Liu, S. MitoZ: a toolkit for animal mitochondrial genome assembly, annotation and visualization. *Nucleic Acids Res.* **47**: e63-e63 (2019).
31. Simao, F. A., Waterhouse, R. M., Ioannidis, P., Kriventseva, E. V., & Zdobnov, E. M. BUSCO: Assessing genome assembly and annotation completeness with single-copy orthologs. *Bioinform.* **31**: 3210-12 (2015).
32. Stuart, K. C., et al. Transcript- and annotation-guided genome assembly of the European starling. *Mol. Ecol. Resour.* **22**: 3141-60 (2022).
33. Rhie, A., Walenz, B. P., Koren, S., & Phillippy, A. M. Merqury: Reference-free quality, completeness, and phasing assessment for genome assemblies. *Genome Biol.* **21**: 245 (2020).
34. Patil, I. Visualizations with statistical details: The 'ggstatsplot' approach. *J. Open Source Softw.* **6**: 3167 (2021).
35. Fulton, T. L., Wagner, S. M., & Shapiro, B. Case study: Recovery of ancient nuclear DNA from toe pads of the extinct passenger pigeon. *Methods Mol. Biol.* **840**: 29-35 (2012).
36. Meyer, M. & Kircher, M. Illumina sequencing library preparation for highly multiplexed target capture and sequencing. *Cold Spring Harb. Protoc.* **2010**: pdb.prot5448 (2010).
37. Miller, N. A., et al. A 26-hour system of highly sensitive whole genome sequencing for emergency management of genetic diseases. *Genome Med.* **7**: 1-16 (2015).
38. Danecek, P., et al. Twelve years of SAMtools and BCFtools. *GigaScience* **10**: giab008 (2021).
39. Li, H. A statistical framework for SNP calling, mutation discovery, association mapping and population genetical parameter estimation from sequencing data. *Bioinform.* **27**: 2987-93 (2011).
40. Wang, K., Li, M., & Hakonarson, H. ANNOVAR: Functional annotation of genetic variants from high-throughput sequencing data. *Nucleic Acids Res.* **38**: e164-e64 (2010).
41. Purcell, S., et al. PLINK: a tool set for whole-genome association and population-based linkage analyses. *Am. J. Med. Genet.* **81**: 559-75 (2007).
42. Van der Auwera, G. A. & O'Connor, B. D. *Genomics in the cloud: using Docker, GATK, and WDL in Terra (1st Edition)*. O'Reilly Media.p. (2020).
43. Stamatakis, A. RAxML version 8: a tool for phylogenetic analysis and post-analysis of large phylogenies. *Bioinform.* **30**: 1312-13 (2014).
44. Ronquist, F., et al. MrBayes 3.2: Efficient Bayesian Phylogenetic Inference and Model Choice Across a Large Model Space. *Syst. Biol.* **61**: 539-42 (2012).
45. Feigin, C. Y., et al. Genome of the Tasmanian tiger provides insights into the evolution and demography of an extinct marsupial carnivore. *Nat. Ecol. Evol.* **2**: 182-92 (2018).
46. Bushnell, B. *BBTools*. 2014; Available from: [sourceforge.net/projects/bbmap/](https://sourceforge.net/projects/bbmap/).
47. Broad Institute, G. R. *Picard Toolkit*. 2019.
48. McKenna, A., et al. The Genome Analysis Toolkit: a MapReduce framework for analyzing next-generation DNA sequencing data. *Genome Res.* **20**: 1297-303 (2010).
49. Danecek, P., et al. The variant call format and VCFtools. *Bioinform.* **27**: 2156-58 (2011).



50. Batley, K. C., et al. Whole genomes reveal multiple candidate genes and pathways involved in the immune response of dolphins to a highly infectious virus. *Mol. Ecol.* **30**: 6434-48 (2021).
51. Quinlan, A. R. & Hall, I. M. BEDTools: a flexible suite of utilities for comparing genomic features. *Bioinform.* **26**: 841-42 (2010).
52. Pomaznoy, M., Ha, B., & Peters, B. GONet: a tool for interactive Gene Ontology analysis. *BMC Bioinform.* **19**: 1-8 (2018).
53. Supek, F., Bošnjak, M., Škunca, N., & Šmuc, T. REVIGO summarizes and visualizes long lists of gene ontology terms. *PLoS One* **6**: e21800 (2011).
54. Pedersen, B. S. & Quinlan, A. R. Mosdepth: Quick coverage calculation for genomes and exomes. *Bioinform.* **34**: 867-68 (2018).
55. Schiffels, S. & Wang, K. MSMC and MSMC2: The Multiple Sequentially Markovian Coalescent in *Statistical Population Genomics*, Dutheil, J. Y., Editor., Springer US: New York, NY. p. 147-66 (2020).
56. Lott, M. J., Wright, B. R., Kemp, L. F., Johnson, R. N., & Hogg, C. J. Genetic management of captive and reintroduced bilby populations. *J. Wildl. Manag.* **84**: 20-32 (2020).
57. Miller, E. J., Eldridge, M. D. B., Morris, K., Thomas, N., & Herbert, C. A. Captive management and the maintenance of genetic diversity in a vulnerable marsupial, the greater bilby. *Aust. Mammal.* **37**: 170-81 (2015).
58. Southgate, R. & Possingham, H. P. Modeling the reintroduction of the greater bilby *Macrotis lagotis* using the metapopulation model analysis of the likelihood of extinction (ALEX). *Biol. Conserv.* **73**: 151-60 (1995).
59. Woinarski, J., Burbidge, A., & Harrison, P. A review of the conservation status of Australian mammals. *Therya* **6**: 155-66 (2015).
60. Lynch, M., et al. Genetic drift, selection and the evolution of the mutation rate. *Nat. Rev. Genet.* **17**: 704-14 (2016).
61. Uchimura, A., et al. Germline mutation rates and the long-term phenotypic effects of mutation accumulation in wild-type laboratory mice and mutator mice. *Genome Res.* **25**: 1125-34 (2015).
62. Duntsch, L., Whibley, A., Brekke, P., Ewen, J. G., & Santure, A. W. Genomic data of different resolutions reveal consistent inbreeding estimates but contrasting homozygosity landscapes for the threatened Aotearoa New Zealand hihi. *Mol. Ecol.* (2021).
63. Curik, I., Ferenčaković, M., & Sölkner, J. Inbreeding and runs of homozygosity: a possible solution to an old problem. *Livest. Sci.* **166**: 26-34 (2014).
64. Meyermans, R., Gorssen, W., Buys, N., & Janssens, S. How to study runs of homozygosity using PLINK? A guide for analyzing medium density SNP data in livestock and pet species. *BMC Genomics* **21**: 1-14 (2020).
65. Christie, P. M., The Australasian Species Management Plan for Zoo Populations of the Greater Bilby, *Macrotis lagotis*. 1991, Species Management Co-ordinating Council (SMCC), ARAZPA: Sydney, Australia. p. 40.
66. ZAA, Greater bilby annual report and recommendations. 2016, Zoo and Aquarium Association Australasia: Mosman, NSW.
67. Bradley, K., Lees, C., & Lundie-Jenkins, G. *Greater bilby recovery summit 2015: Report and interim conservation plan*, Apple Valley, USA: IUCN Species Survival Commission (SSC), Conservation Breeding Specialist Group (CBSG).p. 125 (2015).
68. Wright, B., et al. Impact of reduced-representation sequencing protocols on detecting population structure in a threatened marsupial. *Mol. Biol. Rep.* **46**: 5575-80 (2019).
69. Dziminski, M. A., Carpenter, F. M., & Morris, F. Range of the greater bilby (*Macrotis lagotis*) in the Pilbara Region, Western Australia. *J. Royal. Soc. WA* **103**: 97-102 (2020).

70. Wright, B., et al. From reference genomes to population genomics: comparing three reference-aligned reduced-representation sequencing pipelines in two wildlife species. *From reference genomes to population genomics: comparing three reference-aligned reduced-representation sequencing pipelines in two wildlife species* **20**: 1-10 (2019).
71. Catchen, J., Hohenlohe, P. A., Bassham, S., Amores, A., & Cresko, W. A. Stacks: an analysis tool set for population genomics. *Mol. Ecol.* **22**: 3124-40 (2013).
72. Catchen, J. M., Amores, A., Hohenlohe, P., Cresko, W., & Postlethwait, J. H. Stacks: Building and genotyping loci de novo from short-read sequences. *G3* **1**: 171-82 (2011).
73. Bolger, A. M., Lohse, M., & Usadel, B. Trimmomatic: a flexible trimmer for Illumina sequence data. *Bioinform.* **30**: 2114-20 (2014).
74. Langmead, B. & Salzberg, S. L. Fast gapped-read alignment with Bowtie2. *Nat. Methods* **9**: 357-59 (2012).
75. R Core Team, R: a language and environment for statistical computing. 2021, R Foundation for Statistical Computing: Vienna (Austria).
76. Goudet, J. HIERFSTAT, a package for R to compute and test hierarchical F-statistics. *Mol. Ecol. Notes* **5**: 184-86 (2005).
77. Gruber, B., Unmack, P. J., Berry, O. F., & Georges, A. dartr: An r package to facilitate analysis of SNP data generated from reduced representation genome sequencing. *Mol. Ecol. Resour.* **18**: 691-99 (2018).
78. Keenan, K., McGinnity, P., Cross, T. F., Crozier, W. W., & Prodöhl, P. A. diveRsity: An R package for the estimation and exploration of population genetics parameters and their associated errors. *MEE* **4**: 782-88 (2013).
79. Kardos, M., Taylor, H. R., Ellegren, H., Luikart, G., & Allendorf, F. W. Genomics advances the study of inbreeding depression in the wild. *Evol. Appl.* **9**: 1205-18 (2016).
80. Wang, J. Coancestry: A program for simulating, estimating and analysing relatedness and inbreeding coefficients. *Mol. Ecol. Resour.* **11**: 141-45 (2011).
81. Pembleton, L. W., Cogan, N. O., & Forster, J. W. StAMPP: an R package for calculation of genetic differentiation and structure of mixed-ploidy level populations. *Mol. Ecol. Resour.* **13**: 946-52 (2013).
82. Do, C., et al. NeEstimator v2: Re-implementation of software for the estimation of contemporary effective population size ( $N_e$ ) from genetic data. *Mol. Ecol. Resour.* **14**: 209-14 (2014).
83. Peel, D., Waples, R. S., Macbeth, G. M., Do, C., & Ovenden, J. R. Accounting for missing data in the estimation of contemporary genetic effective population size ( $N_e$ ). *Mol. Ecol. Resour.* **13**: 243-53 (2013).
84. Waples, R. K., Larson, W. A., & Waples, R. S. Estimating contemporary effective population size in non-model species using linkage disequilibrium across thousands of loci. *Heredity* **117**: 233-40 (2016).
85. Jones, A. T., Ovenden, J. R., & Wang, Y. G. Improved confidence intervals for the linkage disequilibrium method for estimating effective population size. *Heredity* **117**: 217-23 (2016).
86. Raj, A., Stephens, M., & Pritchard, J. K. fastSTRUCTURE: variational inference of population structure in large SNP data sets. *Genet.* **197**: 573-89 (2014).
87. Zheng, X., et al. A high-performance computing toolset for relatedness and principal component analysis of SNP data. *Bioinform.* **28**: 3326-28 (2012).
88. Peakall, R. & Smouse, P. E. GenAIEx 6.5: genetic analysis in Excel. Population genetic software for teaching and research—an update. *Bioinform.* **28**: 2537-39 (2012).
89. Waits, L. P., Luikart, G., & Taberlet, P. Estimating the probability of identity among genotypes in natural populations: Cautions and guidelines. *Mol. Ecol.* **10**: 249-56 (2001).

90. Sunnucks, P. & Hales, D. F. Numerous transposed sequences of mitochondrial cytochrome oxidase I-II in aphids of the genus *Sitobion* (Hemiptera: Aphididae). *MBE* **13**: 510-24 (1996).
91. Piggott, M. P. & Taylor, A. C. Extensive evaluation of faecal preservation and DNA extraction methods in Australian native and introduced species. *Aust. J. Zool.* **51**: 341-55 (2003).
92. Huntley, B., ScatMatch: Functions to aid with processing mass array data. 2022.
93. Mijangos, J. L., Gruber, B., Berry, O., Pacioni, C., & Georges, A. dartR v2: An accessible genetic analysis platform for conservation, ecology and agriculture. *MEE* **13**: 2150-58 (2022).
94. Hogg, C. J., et al. “Devil Tools & Tech”: a synergy of conservation research and management practice. *Conserv. Lett.* **10**: 133-38 (2017).
95. Andrews, S. *FastQC A quality control tool for high throughput sequence data*. 2014 21 September 2020]; Available from: <http://www.bioinformatics.babraham.ac.uk/projects/fastqc>.
96. Kim, D., Paggi, J. M., Park, C., Bennett, C., & Salzberg, S. L. Graph-based genome alignment and genotyping with HISAT2 and HISAT-genotype. *Nat. Biotechnol.* **37**: 907-15 (2019).
97. Pertea, M., et al. StringTie enables improved reconstruction of a transcriptome from RNA-seq reads. *Nat. Biotechnol.* **33**: 290-95 (2015).
98. Kuo, R. I., et al. Illuminating the dark side of the human transcriptome with long read transcript sequencing. *BMC Genomics* **21**: 1-22 (2020).
99. Kang, Y.-J., et al. CPC2: a fast and accurate coding potential calculator based on sequence intrinsic features. *Nucleic Acids Res.* **45**: W12-W16 (2017).
100. Haas, B. J., et al. *De novo* transcript sequence reconstruction from RNA-seq using the Trinity platform for reference generation and analysis. *Nat. Protoc.* **8**: 1494-512 (2013).
101. Keilwagen, J., Hartung, F., & Grau, J. GeMoMa: Homology-based gene prediction utilizing intron position conservation and RNA-seq data. *Methods Mol. Biol.* **1962**: 161-77 (2019).
102. Smit, A., Hubley, R., & Green, P. *RepeatModeler Open-1.0*. 2008-2015 19 December 2019]; Available from: <http://www.repeatmasker.org>.
103. Smit, A., Hubley, R., & Green, P. *RepeatMasker Open-4.0*. 2013-2015 19 December 2019]; Available from: <http://www.repeatmasker.org>.
104. Seemann, T. barrnap 0.9: Rapid ribosomal RNA prediction. *barrnap 0.9: Rapid ribosomal RNA prediction* (2013).
105. Nawrocki, E. P. & Eddy, S. R. Infernal 1.1: 100-fold faster RNA homology searches. *Bioinform.* **29**: 2933-35 (2013).
106. Lovell, J. T., et al. GENESPACE tracks regions of interest and gene copy number variation across multiple genomes. *eLife* **11**: e78526 (2022).
107. Tian, R., et al. A chromosome-level genome of *Antechinus flavipes* provides a reference for an Australian marsupial genus with male death after mating. *Mol. Ecol. Resour.* **22**: 740-54 (2022).
108. Mikkelsen, T. S., et al. Genome of the marsupial *Monodelphis domestica* reveals innovation in non-coding sequences. *Nature* **447**: 167-77 (2007).
109. Stammnitz, M. R., et al. The evolution of two transmissible cancers in Tasmanian devils. *Science* **380**: 283-93 (2023).
110. Bond, D. M., et al. The admixed brushtail possum genome reveals invasion history in New Zealand and novel imprinted genes. *Nat. Comms.* **14**: 6364 (2023).
111. Tian, R., et al. A Chromosome-Level Genome of the Agile Gracile Mouse Opossum (*Gracilinanus agilis*). *Genome Biol. Evol.* **13** (2021).
112. Schwalb, B., et al., LSD: Lots of Superior Depictions. 2020.

113. Marín-Gual, L., et al. Strategies for meiotic sex chromosome dynamics and telomeric elongation in Marsupials. *PLoS Genet.* **18** (2022).
114. Brandies, P. A., Tang, S., Johnson, R. S., Hogg, C. J., & Belov, K. The first antechinus reference genome provides a resource for investigating the genetic basis of semelparity and age-related neuropathologies. *GigaByte*: 1-22 (2020).
115. Johnson, R. N., et al. Adaptation and conservation insights from the koala genome. *Nat. Genet.* **50**: 1102-11 (2018).
116. Renfree, M. B., et al. Genome sequence of an Australian kangaroo, *Macropus eugenii*, provides insight into the evolution of mammalian reproduction and development. *Genome Biol.* **12**: 1-26 (2011).
117. Zhou, Y., et al. Platypus and echidna genomes reveal mammalian biology and evolution. *Nature* **592**: 756-62 (2021).
118. Yang, Z. PAML 4: Phylogenetic analysis by maximum likelihood. *MBE* **24**: 1586-91 (2007).
119. Jeffares, D. C., Tomiczek, B., Sojo, V., & dos Reis, M. A beginners guide to estimating the non-synonymous to synonymous rate ratio of all protein-coding genes in a genome. *Parasite Gen. Prot.:* 65-90 (2015).
120. Duchêne, D. A., et al. Analysis of phylogenomic tree space resolves relationships among marsupial families. *Syst. Biol.* **67**: 400-12 (2018).
121. Álvarez-Carretero, S., et al. A species-level timeline of mammal evolution integrating phylogenomic data. *Nature* **602**: 263-67 (2022).
122. Katoh, K. & Standley, D. M. MAFFT multiple sequence alignment software version 7: improvements in performance and usability. *MBE* **30**: 772-80 (2013).
123. Capella-Gutiérrez, S., Silla-Martínez, J. M., & Gabaldón, T. trimAl: a tool for automated alignment trimming in large-scale phylogenetic analyses. *Bioinform.* **25**: 1972-73 (2009).
124. Borowiec, M. L. AMAS: a fast tool for alignment manipulation and computing of summary statistics. *PeerJ* **4**: e1660 (2016).
125. Mendes, F. K., Vanderpool, D., Fulton, B., & Hahn, M. W. CAFE 5 models variation in evolutionary rates among gene families. *Bioinform.* **36**: 5516-18 (2020).
126. Niimura, Y. & Nei, M. Extensive gains and losses of olfactory receptor genes in mammalian evolution. *PLoS One* **2**: e708 (2007).
127. Niimura, Y., Matsui, A., & Touhara, K. Extreme expansion of the olfactory receptor gene repertoire in African elephants and evolutionary dynamics of orthologous gene groups in 13 placental mammals. *Genome Res.* **24**: 1485-96 (2014).
128. Niimura, Y., Matsui, A., & Touhara, K. Extreme expansion of the olfactory receptor gene repertoire in African elephants and evolutionary dynamics of orthologous gene groups in 13 placental mammals. *Genome Res.* **24**: 1485-96 (2014).
129. Altschul, S. F., Gish, W., Miller, W., Myers, E. W., & Lipman, D. J. Basic local alignment search tool. *J. Mol. Biol.* **215**: 403-10 (1990).
130. Eddy, S. R. Accelerated profile HMM searches. *PLoS Comput. Biol.* **7**: e1002195 (2011).
131. Morris, K. M., Cheng, Y., Warren, W., Papenfuss, A. T., & Belov, K. Identification and analysis of divergent immune gene families within the Tasmanian devil genome. *BMC Genomics* **16**: 1-12 (2015).
132. Peel, E., et al. Best genome sequencing strategies for annotation of complex immune gene families in wildlife. *GigaScience* **11** (2022).
133. Lefranc, M.-P., et al. IMGT®, the international ImMunoGeneTics information system® 25 years on. *Nucleic Acids Res.* **43**: D413-D22 (2015).
134. Johnson, R. N., et al. Adaptation and conservation insights from the koala genome. *Nat. Genet.* **50**: 1102-11 (2018).

135. Saitou, N. & Nei, M. The neighbor-joining method: a new method for reconstructing phylogenetic trees. *MBE* **4**: 406-25 (1987).
136. Felsenstein, J. Confidence limits on phylogenies: an approach using the bootstrap. *Evol.* **39**: 783-91 (1985).
137. Tamura, K., Stecher, G., & Kumar, S. MEGA11: Molecular evolutionary genetics analysis version 11. *MBE* **38**: 3022-27 (2021).
138. Belov, K., et al. Reconstructing an ancestral mammalian immune supercomplex from a marsupial major histocompatibility complex. *PLoS Bio.* **4**: e46 (2006).
139. Belov, K., Lam, M.-P., & Colgan, D. Marsupial MHC class II  $\beta$  genes are not orthologous to the eutherian  $\beta$  gene families. *J. Hered.* **95**: 338-45 (2004).
140. Braud, V. M., Allan, D. S., & McMichael, A. J. Functions of nonclassical MHC and non-MHC-encoded class I molecules. *Curr.Opin.Immunol.* **11**: 100-08 (1999).
