# Supplementary material for: Extant and extinct bilby genomes combined with Indigenous knowledge improve conservation of a unique Australian marsupial
Source: Nat Ecol Evol. 2024 Jul 1;8(7):1311–26. doi: 10.1038/s41559-024-02436-2 (PMC11239497; doi:10.1038/s41559-024-02436-2)
Supplement: Supplementary file 4 — This workbook contains three tables. Table 1 Olfactory Receptor CAFE: OR1D2 and OR1D5 orthogroups. Each orthogroup consists of the estimated likelihood that the orthogroup is ‘real’, the change of copy number in the Ninu lineage and whether the change was deemed significant by CAFE. Table 2 Core placenta gene names: core placenta gene names used for the chorioallantoic conserved gene expression analysis (taken from Armstrong et al. 2017). Table 3 Genome assembly versions: statistical overview of each ninu genome version including tools used for assembly. [file 41559_2024_2436_MOESM4_ESM.xlsx]

## Sheet: Olfactory Receptor CAFE
OR1D2 and OR1D5 orthogroups. Each orthogroup consists of the estimated likelihood that the orthogroup is ‘real’, the change of copy number in the Ninu lineage, and whether the change was deemed significant by CAFE.
Orthogroup	GO	bilby_sig	bilby_change	lnL
OG0000003	OR1D2	FALSE	-3	-9.94253
OG0000005	OR1D2	TRUE	11	-11.1946
OG0000012	OR1D2	NA	NA	-6.81354
OG0000014	OR1D2	TRUE	14	-3.65167
OG0000018	OR1D2	TRUE	12	-8.3062
OG0000035	OR1D2	TRUE	8	-3.65167
OG0000043	OR1D2	FALSE	2	-3.65167
OG0000047	OR1D2	NA	NA	-7.73134
OG0000048	OR1D2	NA	NA	-10.8378
OG0000052	OR1D2	FALSE	3	-6.01784
OG0000055	OR1D2	TRUE	9	-11.7927
OG0000056	OR1D2	TRUE	9	-12.9296
OG0000063	OR1D2	NA	NA	-7.99584
OG0000070	OR1D2	NA	NA	-9.35672
OG0000078	OR1D2	NA	NA	-3.65167
OG0000089	OR1D2	FALSE	0	-18.0603
OG0000090	OR1D2	NA	NA	-27.566
OG0000102	OR1D2	NA	NA	-3.65167
OG0000106	OR1D2	NA	NA	-3.65167
OG0000112	OR1D2	FALSE	-1	-3.65167
OG0000113	OR1D2	TRUE	5	-5.86287
OG0000118	OR1D2	FALSE	-1	-7.82037
OG0000119	OR1D2	NA	NA	-3.65167
OG0000127	OR1D2	FALSE	1	-5.86287
OG0000131	OR1D2	NA	NA	-13.0693
OG0000137	OR1D2	NA	NA	-5.86287
OG0000141	OR1D2	FALSE	2	-6.85047
OG0000143	OR1D2	FALSE	2	-8.43679
OG0000147	OR1D2	TRUE	6	-14.0432
OG0000159	OR1D2	TRUE	3	-5.86287
OG0000166	OR1D2	NA	NA	-3.65167
OG0000170	OR1D2	TRUE	-2	-3.65167
OG0000219	OR1D2	NA	NA	-5.86287
OG0000223	OR1D2	NA	NA	-38.5264
OG0000228	OR1D2	NA	NA	-10.5486
OG0000241	OR1D2	NA	NA	-10.3164
OG0000250	OR1D2	FALSE	-1	-10.2184
OG0000253	OR1D2	NA	NA	-10.7301
OG0000254	OR1D2	FALSE	0	-3.65167
OG0000288	OR1D2	TRUE	4	-3.65167
OG0000290	OR1D2	NA	NA	-3.65167
OG0000310	OR1D2	NA	NA	-15.5862
OG0000315	OR1D2	NA	NA	-3.65167
OG0000341	OR1D2	FALSE	0	-3.65167
OG0000357	OR1D2	NA	NA	-7.82037
OG0000362	OR1D2	FALSE	-1	-3.65167
OG0000381	OR1D2	NA	NA	-3.65167
OG0000385	OR1D2	FALSE	-1	-5.86287
OG0000390	OR1D2	FALSE	0	-5.80506
OG0000392	OR1D2	NA	NA	-6.09505
OG0000401	OR1D2	FALSE	1	-7.23819
OG0000402	OR1D2	FALSE	0	-3.65167
OG0000423	OR1D2	TRUE	5	-7.23819
OG0000447	OR1D2	NA	NA	-6.02697
OG0000448	OR1D2	FALSE	0	-3.65167
OG0000474	OR1D2	TRUE	3	-3.65167
OG0000479	OR1D2	FALSE	2	-7.94504
OG0000510	OR1D2	FALSE	0	-8.01626
OG0000526	OR1D2	FALSE	-1	-5.89409
OG0000534	OR1D2	NA	NA	-3.65167
OG0000555	OR1D2	FALSE	1	-8.23817
OG0000556	OR1D2	FALSE	-1	-3.65167
OG0000576	OR1D2	FALSE	0	-6.81354
OG0000586	OR1D2	FALSE	-1	-3.65167
OG0000592	OR1D2	NA	NA	-5.57795
OG0000608	OR1D2	NA	NA	-6.85047
OG0000663	OR1D2	NA	NA	-3.65167
OG0000688	OR1D2	NA	NA	-27.7361
OG0000701	OR1D2	NA	NA	-3.65167
OG0000702	OR1D2	NA	NA	-3.65167
OG0000714	OR1D2	FALSE	-1	-6.85047
OG0000750	OR1D2	NA	NA	-16.1494
OG0000756	OR1D2	NA	NA	-3.65167
OG0000757	OR1D2	NA	NA	-13.2583
OG0000800	OR1D2	TRUE	2	-3.65167
OG0000812	OR1D2	NA	NA	-5.80506
OG0000817	OR1D2	FALSE	-1	-3.65167
OG0000844	OR1D2	FALSE	0	-8.77675
OG0000847	OR1D2	NA	NA	-3.65167
OG0000848	OR1D2	FALSE	0	-5.89409
OG0000923	OR1D2	FALSE	1	-3.65167
OG0000924	OR1D2	NA	NA	-6.85047
OG0000936	OR1D2	FALSE	0	-9.00386
OG0000948	OR1D2	NA	NA	-5.95615
OG0000949	OR1D2	NA	NA	-3.65167
OG0000951	OR1D2	FALSE	0	-12.3717
OG0001039	OR1D2	NA	NA	-5.95615
OG0001069	OR1D2	NA	NA	-7.93769
OG0001071	OR1D2	FALSE	-1	-5.57795
OG0001163	OR1D2	NA	NA	-5.80506
OG0001164	OR1D2	FALSE	0	-3.65167
OG0001188	OR1D2	NA	NA	-3.65167
OG0001288	OR1D2	FALSE	-1	-3.65167
OG0001316	OR1D2	FALSE	1	-3.65167
OG0001356	OR1D2	NA	NA	-3.65167
OG0001419	OR1D2	FALSE	0	-3.65167
OG0001455	OR1D2	FALSE	0	-5.86287
OG0001456	OR1D2	NA	NA	-3.65167
OG0001457	OR1D2	NA	NA	-7.95327
OG0001462	OR1D2	FALSE	0	-5.86287
OG0001479	OR1D2	NA	NA	-6.81354
OG0001504	OR1D2	NA	NA	-5.86287
OG0001544	OR1D2	FALSE	0	-9.06167
OG0001566	OR1D2	NA	NA	-3.65167
OG0001598	OR1D2	NA	NA	-5.86287
OG0001638	OR1D2	NA	NA	-5.86287
OG0001662	OR1D2	NA	NA	-3.65167
OG0001663	OR1D2	FALSE	0	-3.65167
OG0001725	OR1D2	NA	NA	-5.86287
OG0001764	OR1D2	NA	NA	-13.5002
OG0001815	OR1D2	NA	NA	-3.65167
OG0001838	OR1D2	NA	NA	-10.0316
OG0001839	OR1D2	FALSE	1	-8.85529
OG0001840	OR1D2	NA	NA	-6.01784
OG0001859	OR1D2	FALSE	0	-3.65167
OG0001860	OR1D2	NA	NA	-39.0774
OG0001861	OR1D2	FALSE	0	-3.65167
OG0001862	OR1D2	NA	NA	-3.65167
OG0001882	OR1D2	TRUE	1	-31.4852
OG0001904	OR1D2	FALSE	0	-5.80506
OG0001905	OR1D2	FALSE	0	-3.65167
OG0001927	OR1D2	NA	NA	-3.65167
OG0001981	OR1D2	NA	NA	-5.89409
OG0001992	OR1D2	FALSE	0	-3.65167
OG0002009	OR1D2	NA	NA	-9.00386
OG0002020	OR1D2	FALSE	0	-6.85047
OG0002021	OR1D2	NA	NA	-26.616
OG0002023	OR1D2	FALSE	0	-12.3252
OG0002035	OR1D2	NA	NA	-10.6979
OG0002114	OR1D2	NA	NA	-5.89409
OG0002127	OR1D2	NA	NA	-3.65167
OG0002138	OR1D2	NA	NA	-6.02697
OG0002171	OR1D2	FALSE	0	-8.23817
OG0002199	OR1D2	NA	NA	-12.7218
OG0002220	OR1D2	NA	NA	-6.01784
OG0002240	OR1D2	NA	NA	-11.3558
OG0002260	OR1D2	NA	NA	-12.1164
OG0002281	OR1D2	FALSE	0	-3.65167
OG0002282	OR1D2	NA	NA	-5.57795
OG0002284	OR1D2	FALSE	0	-8.39307
OG0002285	OR1D2	NA	NA	-5.57795
OG0002357	OR1D2	FALSE	0	-3.65167
OG0002382	OR1D2	NA	NA	-13.859
OG0002458	OR1D2	NA	NA	-6.85047
OG0002524	OR1D2	FALSE	0	-5.86287
OG0002630	OR1D2	FALSE	0	-7.01163
OG0002631	OR1D2	FALSE	0	-13.7613
OG0002639	OR1D2	NA	NA	-3.65167
OG0002640	OR1D2	NA	NA	-6.85047
OG0002729	OR1D2	FALSE	-1	-6.93938
OG0002738	OR1D2	NA	NA	-11.3754
OG0002782	OR1D2	NA	NA	-16.8898
OG0002784	OR1D2	NA	NA	-3.65167
OG0002786	OR1D2	FALSE	1	-5.80506
OG0002788	OR1D2	NA	NA	-3.65167
OG0002789	OR1D2	NA	NA	-5.57795
OG0002793	OR1D2	FALSE	0	-5.57795
OG0002946	OR1D2	NA	NA	-5.86287
OG0002956	OR1D2	FALSE	-1	-5.86287
OG0003160	OR1D2	NA	NA	-5.80506
OG0003174	OR1D2	NA	NA	-3.65167
OG0003175	OR1D2	FALSE	0	-5.86287
OG0003375	OR1D2	NA	NA	-7.33027
OG0003396	OR1D2	NA	NA	-6.02697
OG0003420	OR1D2	NA	NA	-13.856
OG0003719	OR1D2	NA	NA	-3.65167
OG0003822	OR1D2	NA	NA	-8.42828
OG0004134	OR1D2	FALSE	0	-7.88245
OG0004157	OR1D2	FALSE	0	-5.80506
OG0004314	OR1D2	NA	NA	-5.89409
OG0004648	OR1D2	FALSE	1	-3.65167
OG0004654	OR1D2	NA	NA	-8.74006
OG0005904	OR1D2	NA	NA	-5.86287
OG0006451	OR1D2	NA	NA	-3.65167
OG0006836	OR1D2	NA	NA	-10.452
OG0007452	OR1D2	NA	NA	-9.56227
OG0008015	OR1D2	FALSE	0	-9.16185
OG0008016	OR1D2	NA	NA	-7.94504
OG0008344	OR1D2	NA	NA	-3.65167
OG0008402	OR1D2	FALSE	0	-3.65167
OG0008527	OR1D2	NA	NA	-8.74006
OG0008534	OR1D2	NA	NA	-3.65167
OG0008551	OR1D2	NA	NA	-3.65167
OG0008595	OR1D2	NA	NA	-5.89409
OG0008630	OR1D2	NA	NA	-12.5855
OG0008913	OR1D2	NA	NA	-6.02697
OG0009335	OR1D2	NA	NA	-8.15845
OG0009569	OR1D2	FALSE	0	-6.85047
OG0009997	OR1D2	NA	NA	-17.3001
OG0010003	OR1D2	NA	NA	-3.65167
OG0010004	OR1D2	NA	NA	-5.89409
OG0010005	OR1D2	FALSE	0	-5.86287
OG0010039	OR1D2	NA	NA	-12.5138
OG0010040	OR1D2	NA	NA	-7.99584
OG0010648	OR1D2	NA	NA	-16.9161
OG0010650	OR1D2	NA	NA	-7.95327
OG0010768	OR1D2	NA	NA	-6.85047
OG0010893	OR1D2	NA	NA	-25.7032
OG0011276	OR1D2	NA	NA	-5.86287
OG0011375	OR1D2	NA	NA	-7.73134
OG0011385	OR1D2	TRUE	1	-3.65167
OG0011387	OR1D2	NA	NA	-3.65167
OG0011398	OR1D2	NA	NA	-9.06167
OG0011399	OR1D2	NA	NA	-12.1333
OG0011403	OR1D2	NA	NA	-3.65167
OG0011404	OR1D2	NA	NA	-5.80506
OG0011407	OR1D2	NA	NA	-3.65167
OG0011541	OR1D2	NA	NA	-3.65167
OG0011542	OR1D2	NA	NA	-8.19524
OG0011705	OR1D2	NA	NA	-3.65167
OG0011706	OR1D2	NA	NA	-5.57795
OG0011725	OR1D2	NA	NA	-8.26027
OG0011817	OR1D2	NA	NA	-10.9301
OG0011876	OR1D2	NA	NA	-5.57795
OG0011983	OR1D2	NA	NA	-3.65167
OG0011987	OR1D2	NA	NA	-3.65167
OG0012232	OR1D2	NA	NA	-3.65167
OG0012235	OR1D2	NA	NA	-7.82037
OG0012500	OR1D2	FALSE	0	-3.65167
OG0012538	OR1D2	NA	NA	-3.65167
OG0012649	OR1D2	NA	NA	-3.65167
OG0012674	OR1D2	NA	NA	-6.85047
OG0012678	OR1D2	NA	NA	-5.86287
OG0012697	OR1D2	NA	NA	-11.0192
OG0012698	OR1D2	NA	NA	-11.5015
OG0012727	OR1D2	NA	NA	-3.65167
OG0012742	OR1D2	NA	NA	-5.80506
OG0012755	OR1D2	NA	NA	-8.01626
OG0012803	OR1D2	NA	NA	-10.9984
OG0012812	OR1D2	NA	NA	-9.22578
OG0012823	OR1D2	NA	NA	-10.9261
OG0012880	OR1D2	NA	NA	-5.57795
OG0012925	OR1D2	NA	NA	-3.65167
OG0013028	OR1D2	NA	NA	-3.65167
OG0013029	OR1D2	NA	NA	-6.85047
OG0013083	OR1D2	NA	NA	-3.65167
OG0013084	OR1D2	NA	NA	-3.65167
OG0013090	OR1D2	NA	NA	-5.80506
OG0013091	OR1D2	NA	NA	-7.38369
OG0013169	OR1D2	FALSE	0	-3.65167
OG0013295	OR1D2	NA	NA	-14.0928
OG0013334	OR1D2	NA	NA	-3.65167
OG0013398	OR1D2	NA	NA	-6.02697
OG0013450	OR1D2	NA	NA	-6.85047
OG0013454	OR1D2	NA	NA	-7.73134
OG0013474	OR1D2	TRUE	2	-3.65167
OG0013486	OR1D2	NA	NA	-9.00386
OG0013492	OR1D2	FALSE	0	-3.65167
OG0013553	OR1D2	NA	NA	-5.86287
OG0013572	OR1D2	NA	NA	-3.65167
OG0013614	OR1D2	NA	NA	-6.6613
OG0013635	OR1D2	NA	NA	-9.23628
OG0013636	OR1D2	NA	NA	-3.65167
OG0013666	OR1D2	NA	NA	-5.86287
OG0013683	OR1D2	NA	NA	-13.3203
OG0013685	OR1D2	NA	NA	-10.9879
OG0013690	OR1D2	NA	NA	-3.65167
OG0013691	OR1D2	NA	NA	-5.86287
OG0013707	OR1D2	NA	NA	-9.92212
OG0013744	OR1D2	NA	NA	-9.21668
OG0013843	OR1D2	NA	NA	-3.65167
OG0013902	OR1D2	NA	NA	-5.57795
OG0013915	OR1D2	FALSE	1	-5.89409
OG0013923	OR1D2	NA	NA	-8.77675
OG0013973	OR1D2	NA	NA	-7.12958
OG0013990	OR1D2	NA	NA	-8.39307
OG0014006	OR1D2	NA	NA	-5.86287
OG0014050	OR1D2	NA	NA	-5.57795
OG0014073	OR1D2	NA	NA	-8.18405
OG0014079	OR1D2	NA	NA	-14.0025
OG0014093	OR1D2	NA	NA	-13.417
OG0014094	OR1D2	NA	NA	-3.65167
OG0014131	OR1D2	NA	NA	-7.82037
OG0014137	OR1D2	NA	NA	-10.0885
OG0014148	OR1D2	NA	NA	-3.65167
OG0014156	OR1D2	NA	NA	-9.79969
OG0014187	OR1D2	NA	NA	-10.9301
OG0014189	OR1D2	NA	NA	-5.86287
OG0014190	OR1D2	NA	NA	-3.65167
OG0014285	OR1D2	NA	NA	-5.57795
OG0014317	OR1D2	NA	NA	-5.2033
OG0014339	OR1D2	NA	NA	-3.65167
OG0014340	OR1D2	NA	NA	-11.1982
OG0014382	OR1D2	NA	NA	-3.65167
OG0014383	OR1D2	NA	NA	-6.85047
OG0014384	OR1D2	NA	NA	-5.57795
OG0014397	OR1D2	NA	NA	-3.65167
OG0014405	OR1D2	NA	NA	-8.77675
OG0014436	OR1D2	NA	NA	-5.78429
OG0014457	OR1D2	NA	NA	-6.02697
OG0014476	OR1D2	NA	NA	-3.65167
OG0014498	OR1D2	NA	NA	-3.65167
OG0014515	OR1D2	NA	NA	-9.09289
OG0014549	OR1D2	NA	NA	-8.08726
OG0014577	OR1D2	NA	NA	-6.85047
OG0014593	OR1D2	NA	NA	-3.65167
OG0014630	OR1D2	FALSE	0	-3.65167
OG0014645	OR1D2	NA	NA	-11.8668
OG0014660	OR1D2	NA	NA	-10.8472
OG0014751	OR1D2	NA	NA	-6.85047
OG0014767	OR1D2	NA	NA	-8.23817
OG0014772	OR1D2	NA	NA	-12.4463
OG0014785	OR1D2	NA	NA	-29.5597
OG0014794	OR1D2	NA	NA	-10.8472
OG0014935	OR1D2	NA	NA	-3.65167
OG0014973	OR1D2	NA	NA	-6.01784
OG0015033	OR1D2	NA	NA	-3.65167
OG0015061	OR1D2	NA	NA	-3.65167
OG0015079	OR1D2	NA	NA	-3.65167
OG0015091	OR1D2	NA	NA	-6.01784
OG0015109	OR1D2	NA	NA	-4.20854
OG0015186	OR1D2	NA	NA	-3.65167
OG0015187	OR1D2	NA	NA	-3.65167
OG0015255	OR1D2	NA	NA	-9.06167
OG0015297	OR1D2	NA	NA	-7.99584
OG0015344	OR1D2	NA	NA	-3.65167
OG0015349	OR1D2	NA	NA	-5.78429
OG0015350	OR1D2	NA	NA	-10.9301
OG0015358	OR1D2	FALSE	0	-10.9879
OG0015375	OR1D2	NA	NA	-9.45409
OG0015388	OR1D2	NA	NA	-5.95615
OG0015440	OR1D2	NA	NA	-5.86287
OG0015451	OR1D2	NA	NA	-5.57795
OG0015528	OR1D2	NA	NA	-5.55288
OG0015529	OR1D2	NA	NA	-5.89409
OG0015532	OR1D2	NA	NA	-3.65167
OG0015542	OR1D2	NA	NA	-3.65167
OG0015633	OR1D2	NA	NA	-3.65167
OG0015685	OR1D2	NA	NA	-5.86287
OG0015695	OR1D2	NA	NA	-5.86287
OG0015701	OR1D2	NA	NA	-7.73134
OG0015708	OR1D2	NA	NA	-8.36933
OG0015735	OR1D2	NA	NA	-8.74006
OG0015736	OR1D2	NA	NA	-6.85047
OG0015758	OR1D2	NA	NA	-3.65167
OG0015759	OR1D2	NA	NA	-6.81354
OG0015767	OR1D2	NA	NA	-123.238
OG0015861	OR1D2	NA	NA	-7.95327
OG0016078	OR1D2	NA	NA	-5.86287
OG0016119	OR1D2	NA	NA	-16.71
OG0016177	OR1D2	NA	NA	-12.0421
OG0016243	OR1D2	NA	NA	-10.1958
OG0016259	OR1D2	NA	NA	-3.65167
OG0016463	OR1D2	NA	NA	-11.1439
OG0016477	OR1D2	NA	NA	-3.65167
OG0016487	OR1D2	NA	NA	-6.85047
OG0016604	OR1D2	NA	NA	-3.65167
OG0016605	OR1D2	NA	NA	-3.65167
OG0016606	OR1D2	NA	NA	-3.65167
OG0016655	OR1D2	NA	NA	-5.89409
OG0016660	OR1D2	NA	NA	-8.10529
OG0016661	OR1D2	NA	NA	-8.10529
OG0016668	OR1D2	NA	NA	-9.30997
OG0016693	OR1D2	NA	NA	-9.631
OG0016694	OR1D2	NA	NA	-11.2973
OG0016846	OR1D2	NA	NA	-8.43679
OG0016930	OR1D2	NA	NA	-3.65167
OG0016967	OR1D2	NA	NA	-5.86287
OG0016971	OR1D2	NA	NA	-6.02697
OG0017006	OR1D2	NA	NA	-7.78914
OG0017008	OR1D2	NA	NA	-5.89409
OG0000017	OR1D5	TRUE	6	-6.85047
OG0000028	OR1D5	FALSE	0	-3.65167
OG0000041	OR1D5	TRUE	4	-3.65167
OG0000097	OR1D5	TRUE	19	-5.86287
OG0000103	OR1D5	TRUE	26	-5.89409
OG0000105	OR1D5	TRUE	4	-7.99603
OG0000142	OR1D5	FALSE	1	-8.15845
OG0000160	OR1D5	NA	NA	-5.57795
OG0000185	OR1D5	FALSE	0	-8.69179
OG0000187	OR1D5	NA	NA	-7.95327
OG0000195	OR1D5	TRUE	12	-5.57795
OG0000196	OR1D5	NA	NA	-9.16185
OG0000204	OR1D5	NA	NA	-10.0316
OG0000280	OR1D5	TRUE	3	-10.5038
OG0000281	OR1D5	FALSE	0	-7.76424
OG0000291	OR1D5	TRUE	5	-15.6423
OG0000309	OR1D5	NA	NA	-12.6115
OG0000338	OR1D5	NA	NA	-3.65167
OG0000360	OR1D5	FALSE	1	-8.10529
OG0000403	OR1D5	TRUE	2	-6.02697
OG0000422	OR1D5	FALSE	0	-7.95327
OG0000484	OR1D5	NA	NA	-3.65167
OG0000485	OR1D5	FALSE	1	-6.48018
OG0000525	OR1D5	FALSE	0	-6.01784
OG0000575	OR1D5	NA	NA	-5.86287
OG0000590	OR1D5	TRUE	2	-6.6613
OG0000595	OR1D5	FALSE	2	-3.65167
OG0000651	OR1D5	FALSE	0	-3.65167
OG0000699	OR1D5	NA	NA	-5.86287
OG0000720	OR1D5	NA	NA	-7.64669
OG0000769	OR1D5	NA	NA	-6.02697
OG0000806	OR1D5	NA	NA	-5.80506
OG0000813	OR1D5	NA	NA	-3.65167
OG0000875	OR1D5	NA	NA	-5.86287
OG0000877	OR1D5	NA	NA	-4.20854
OG0000966	OR1D5	NA	NA	-10.2605
OG0001040	OR1D5	NA	NA	-3.65167
OG0001160	OR1D5	FALSE	1	-5.86287
OG0001161	OR1D5	NA	NA	-17.4956
OG0001201	OR1D5	NA	NA	-7.78914
OG0001436	OR1D5	NA	NA	-3.65167
OG0001458	OR1D5	NA	NA	-3.65167
OG0001585	OR1D5	NA	NA	-3.65167
OG0001657	OR1D5	FALSE	-1	-3.65167
OG0001658	OR1D5	NA	NA	-8.17123
OG0001659	OR1D5	FALSE	0	-5.57795
OG0002022	OR1D5	FALSE	-1	-8.77675
OG0002074	OR1D5	FALSE	1	-10.1958
OG0002077	OR1D5	NA	NA	-5.86287
OG0002143	OR1D5	NA	NA	-3.65167
OG0002250	OR1D5	NA	NA	-9.21668
OG0002283	OR1D5	NA	NA	-3.65167
OG0002385	OR1D5	FALSE	1	-5.80506
OG0002500	OR1D5	FALSE	0	-3.65167
OG0002632	OR1D5	NA	NA	-8.01626
OG0002792	OR1D5	NA	NA	-3.65167
OG0002998	OR1D5	NA	NA	-24.7656
OG0003061	OR1D5	NA	NA	-6.4509
OG0003064	OR1D5	FALSE	0	-20.7669
OG0003161	OR1D5	NA	NA	-10.6296
OG0003931	OR1D5	NA	NA	-5.57795
OG0003932	OR1D5	NA	NA	-5.2033
OG0004135	OR1D5	FALSE	-1	-12.8677
OG0004156	OR1D5	NA	NA	-3.65167
OG0004466	OR1D5	NA	NA	-3.65167
OG0004678	OR1D5	NA	NA	-5.86287
OG0004681	OR1D5	NA	NA	-13.6886
OG0005141	OR1D5	NA	NA	-11.3041
OG0005905	OR1D5	FALSE	1	-8.56326
OG0006217	OR1D5	NA	NA	-3.65167
OG0006837	OR1D5	NA	NA	-3.65167
OG0006838	OR1D5	NA	NA	-3.65167
OG0006839	OR1D5	NA	NA	-3.65167
OG0006840	OR1D5	FALSE	0	-3.65167
OG0006897	OR1D5	FALSE	0	-8.50064
OG0008619	OR1D5	NA	NA	-6.65958
OG0009103	OR1D5	FALSE	0	-7.78914
OG0009576	OR1D5	NA	NA	-6.48018
OG0009577	OR1D5	NA	NA	-5.86287
OG0010001	OR1D5	NA	NA	-3.65167
OG0010002	OR1D5	NA	NA	-6.01784
OG0010006	OR1D5	NA	NA	-3.65167
OG0010803	OR1D5	FALSE	0	-3.65167
OG0011262	OR1D5	FALSE	0	-3.65167
OG0011263	OR1D5	NA	NA	-3.65167
OG0011349	OR1D5	NA	NA	-3.65167
OG0011818	OR1D5	NA	NA	-5.86287
OG0011819	OR1D5	NA	NA	-10.0316
OG0011820	OR1D5	NA	NA	-3.65167
OG0011986	OR1D5	NA	NA	-5.86287
OG0011988	OR1D5	NA	NA	-3.65167
OG0011989	OR1D5	NA	NA	-3.65167
OG0012233	OR1D5	NA	NA	-3.65167
OG0012311	OR1D5	NA	NA	-5.89409
OG0012341	OR1D5	NA	NA	-11.849
OG0012342	OR1D5	NA	NA	-11.0192
OG0012747	OR1D5	FALSE	0	-5.57795
OG0012881	OR1D5	NA	NA	-3.65167
OG0013006	OR1D5	NA	NA	-7.01163
OG0013007	OR1D5	NA	NA	-8.56326
OG0013085	OR1D5	NA	NA	-8.32222
OG0013283	OR1D5	FALSE	0	-9.16479
OG0013364	OR1D5	NA	NA	-3.65167
OG0013378	OR1D5	NA	NA	-5.57795
OG0013421	OR1D5	NA	NA	-6.4509
OG0013547	OR1D5	NA	NA	-5.40246
OG0013648	OR1D5	NA	NA	-10.9879
OG0013686	OR1D5	NA	NA	-5.86287
OG0013687	OR1D5	NA	NA	-15.6911
OG0013689	OR1D5	NA	NA	-3.65167
OG0013972	OR1D5	NA	NA	-5.86287
OG0014041	OR1D5	FALSE	0	-6.02697
OG0014132	OR1D5	FALSE	0	-3.65167
OG0014157	OR1D5	NA	NA	-9.70013
OG0014226	OR1D5	NA	NA	-13.8154
OG0014227	OR1D5	NA	NA	-3.65167
OG0014275	OR1D5	NA	NA	-3.65167
OG0014380	OR1D5	NA	NA	-3.65167
OG0014407	OR1D5	NA	NA	-3.65167
OG0014438	OR1D5	FALSE	0	-5.86287
OG0014470	OR1D5	NA	NA	-7.99584
OG0014493	OR1D5	NA	NA	-3.65167
OG0014496	OR1D5	NA	NA	-5.95615
OG0014578	OR1D5	NA	NA	-5.89409
OG0014589	OR1D5	NA	NA	-29.6192
OG0014604	OR1D5	NA	NA	-24.9816
OG0014659	OR1D5	NA	NA	-3.65167
OG0014715	OR1D5	NA	NA	-11.2151
OG0014770	OR1D5	NA	NA	-11.1783
OG0014771	OR1D5	NA	NA	-7.78914
OG0014819	OR1D5	NA	NA	-5.57795
OG0014820	OR1D5	NA	NA	-3.65167
OG0014848	OR1D5	NA	NA	-3.65167
OG0015031	OR1D5	NA	NA	-3.65167
OG0015032	OR1D5	NA	NA	-3.65167
OG0015179	OR1D5	NA	NA	-5.57795
OG0015185	OR1D5	NA	NA	-5.80506
OG0015348	OR1D5	FALSE	0	-5.2033
OG0015364	OR1D5	FALSE	0	-6.85047
OG0015387	OR1D5	NA	NA	-3.65167
OG0015389	OR1D5	NA	NA	-8.01626
OG0015437	OR1D5	NA	NA	-14.2146
OG0015438	OR1D5	NA	NA	-10.6602
OG0015441	OR1D5	NA	NA	-3.65167
OG0015525	OR1D5	NA	NA	-22.8606
OG0015573	OR1D5	NA	NA	-9.00386
OG0015632	OR1D5	NA	NA	-6.6613
OG0015727	OR1D5	NA	NA	-11.7495
OG0015737	OR1D5	NA	NA	-6.02697
OG0015763	OR1D5	NA	NA	-8.10529
OG0016168	OR1D5	NA	NA	-5.86287
OG0016292	OR1D5	NA	NA	-9.30997
OG0016308	OR1D5	NA	NA	-3.65167
OG0016357	OR1D5	NA	NA	-3.65167
OG0016488	OR1D5	NA	NA	-3.65167
OG0016533	OR1D5	NA	NA	-6.85047
OG0016534	OR1D5	NA	NA	-6.65958
OG0016548	OR1D5	NA	NA	-6.02697
OG0016632	OR1D5	NA	NA	-5.57795
OG0016644	OR1D5	NA	NA	-11.1687
OG0016654	OR1D5	NA	NA	-7.73134
OG0016736	OR1D5	NA	NA	-3.65167
OG0016954	OR1D5	NA	NA	-3.65167
OG0017037	OR1D5	NA	NA	-3.65167
OG0017047	OR1D5	NA	NA	-5.86287

## Sheet: Core placenta gene names
Core placenta gene names used for the chorioallantoic conserved gene expression analysis (taken from Armstrong et al 2017)
ACTN1
ACTR2
ACTR3
ADAM9
AHNAK
ANXA1
ANXA2
ANXA5
APLP2
APP
ARF4
ARL6IP5
ARPC5
ATP6AP2
BHLHE40
BZW2
CAP1
CAPN2
CAV1
CCT2
CD9
CFL1
CNN3
CTSB
CYB5A
DAZAP2
DCN
DSTN
EIF4EBP2
EPAS1
ERP29
F11R
F3
FN1
FUCA1
GLUL
GNAS
GOT2
GRB2
HM13
HSP90B1
HSPH1
ILK
IMPDH2
KRTCAP2
LAMC1
LGALS1
LMAN2
LUM
MAGED2
MAPRE1
MAT2A
MFGE8
MYH9
NCKAP1
NDRG1
NET1
OSTC
OSTF1
P4HA1
PDIA3
PEA15
PERP
PLP2
PPM1G
PPP1CB
PPT1
PRKCSH
PTTG1IP
PXDC1
RAB8A
RAC1
RALB
RNPS1
RPL22
RPL28
RPS3A
RPS7
RRBP1
S100A10
S100A11
SAT1
SDC4
SEPT2
SERPINE2
SERPINH1
SLC3A2
SLC44A2
SNX1
SPARC
SPCS2
SPINT2
SQSTM1
SRI
SRSF9
TAGLN2
TAX1BP3
TES
TIMP2
TIMP3
TLN1
TMEM109
TPM4
TRAM1
UBXN1
UQCRH
VAT1
VDAC1
VDAC2
VIM
VPS35
WLS
WSB1
XBP1
YWHAQ

## Sheet: Genome assembly versions
Label	V	Description	SeqNum	CtgNum	TotLength	MinLength	MaxLength	MeanLength	MedLength	N50Length	L50Count	N50Ctg	L50Ctg	NG50Length	LG50Count	GapLength	GapCount	GC	BUSCON	Complete	Duplicated	Fragmented	Missing	BUSCOMP	Ident	Comp	Sing	Dupl	Frag	Part	Ghost	Miss	BUSCO	NoBUSCO	NoBUSCOMP	UniqBUSCO	UniqBUSCOMP	Completeness	QV	ErrorRate
denovo	v1.0	IPA assembly	15001	15001	4589803327	49552	5062189	305966	164073	543659	2278	543659	2278	543659	2278	0	0	38.42	9226	6053	2447	165	561	8273	14.98	96.86	67.28	29.58	2.345	0.7132	0.06044	0.02418	92.13	6.081	0.08462	41	31	92.6071	36.2096	0.000239353
purgedups	v1.1	Purge duplicates	8173	8203	3647887268	11521	5062189	446334	296938	706527	1537	706486	1538	517831	2320	690	30	37.49	9226	7886	516	185	639	8273	14.66	95.81	87.6	8.207	2.913	0.9187	0.133	0.2297	91.07	6.926	0.3627	2	0	90.8558	36.4547	0.000226218
arcs10x	v1.2	ARCS 10X scaffolding	3388	8203	3698282548	11521	13068723	1.09158e+06	559344	2173366	493	692671	1574	1622629	730	50395970	4815	37.49	9226	8007	510	134	575	8273	14.71	98.6	90.37	8.232	0.5681	0.4956	0.1088	0.2297	92.32	6.232	0.3385	0	0	90.8558	36.4547	0.000226218
pbjelly	v1.3	PB Jelly HiFi gap-filling	3348	6873	3692047655	11521	13015073	1.10276e+06	566493	2228689	485	868145	1253	1626992	721	32921380	3525	37.49	9226	8023	508	133	562	8273	14.66	98.75	90.49	8.268	0.556	0.3747	0.08461	0.2297	92.47	6.091	0.31431	0	0	91.0819	36.3791	0.000230192
pilon	v1.4.0	Pilon-corrected assembly	3348	6668	3687920528	11506	12995542	1.10153e+06	564960	2221433	485	900404	1191	1624251	722	32095445	3320	37.49	9226	8090	487	123	526	8273	14.26	98.75	90.52	8.232	0.556	0.3626	0.0967	0.2297	92.97	5.701	0.3264	0	0	91.6062	39.8053	0.000104586
core	v1.4.1a	Diploidocus tidy - core assembly for scaffolding	2850	6119	3570200940	11506	12995542	1.2527e+06	746232	2317679	459	930823	1129	1623881	722	31454451	3269	36.98	9226	8093	483	123	527	8273	14.25	98.74	90.54	8.207	0.556	0.3747	0.0967	0.2297	92.95	5.712	0.3264	0	0	91.3415	39.7347	0.000106299
gapspanner	v1.4.2	GapSpanner filled core assembly	2850	6067	3570346125	11506	12995542	1.25275e+06	746232	2317679	459	949798	1114	1623881	722	31266506	3217	36.98	9226	8093	483	123	527	8273	14.25	98.74	90.54	8.207	0.556	0.3747	0.0967	0.2297	92.95	5.712	0.3264	0	0	91.3425	39.7267	0.000106496
hypo	v1.4.3	HyPo-corrected tidied core assembly	2850	5929	3570047626	11502	12994148	1.25265e+06	746212	2317414	459	967247	1088	1623800	722	31233640	3079	36.99	9226	8113	474	122	517	8273	13.13	98.74	90.54	8.207	0.556	0.3747	0.0967	0.2297	93.07	5.604	0.3264	0	0	91.5794	40.2985	9.33576e-05
hirise	v1.5	HiRise HiC-scaffolded core assembly	296	5955	3569745066	36036	934426298	1.20599e+07	232274	343869464	3	964720	1093	279334954	5	31474470	5659	36.99	9226	8149	446	123	508	8273	13.19	99.3	92.86	6.443	0.01209	0.3626	0.0967	0.2297	93.16	5.506	0.3264	0	0	91.5793	40.3733	9.1763e-05
gapclosed	v1.6	Gap-closed HiC-scaffolded assembly with full debris	665	5102	3663559961	36161	469040693	5.50911e+06	229546	343853051	5	1220749	874	279321257	7	12572392	4437	37.38	9226	8170	455	105	496	8273	13.2	99.63	92.84	6.781	0.01209	0.1088	0.06044	0.1934	93.49	5.376	0.25384	0	0	92.2187	40.4139	9.09092e-05
tidy2	v1.7	Diploidocus tidy of HiC-scaffolded assembly	610	5028	3655747077	39698	469040693	5.99303e+06	241038	343853051	5	1224214	871	279321257	7	12524414	4418	37.35	9226	8170	455	105	496	8273	13.2	99.63	92.84	6.781	0.01209	0.1088	0.06044	0.1934	93.49	5.376	0.25384	0	0	92.2088	40.4156	9.08741e-05
numtfix	v1.8	Manual curation of Scaffold 2 NUMT	610	5027	3655715067	39698	469040693	5.99298e+06	241038	343853051	5	1224214	871	279321257	7	12523654	4417	37.35	9226	8170	455	105	496	8273	13.2	99.63	92.84	6.781	0.01209	0.1088	0.06044	0.1934	93.49	5.376	0.25384	0	0	92.2085	40.4156	9.08749e-05
final	v1.9	Final Bilby v1.9 genome assembly	609	5028	3655732724	17457	934355570	6.00285e+06	238662	343853051	3	1224214	871	279321257	5	12523854	4419	37.35	9226	8173	452	106	495	8273	13.2	99.63	93.15	6.479	0.01209	0.1088	0.06044	0.1934	93.49	5.365	0.25384	0	0	92.2088	40.4156	9.08744e-05
chrom	v1.9	Final Bilby v1.9 genome assembly - chromosomes only	10	4429	3495292005	17457	934355570	3.49529e+08	2.76588e+08	343853051	3	1285308	808	279321257	5	12523854	4419	36.61	9226	8174	449	106	497	8273	13.2	99.63	93.18	6.443	0.01209	0.1088	0.06044	0.1934	93.46	5.387	0.25384	0	0	91.9241	40.3317	9.2647e-05
